# Supplementary material for: Independent Membrane Binding Properties of the Caspase Generated Fragments of the Beaded Filament Structural Protein 1 (BFSP1) Involves an Amphipathic Helix
Source: MDPI journal article supplement (doi:10.3390/cells12121580), 2023-06-07
Supplement: s1 [file s1]

Supplementary File for the submission “An amphipathic helix facilitates the membrane binding properties of BFSP1 and its caspase-generated C-terminal domain.” by Jarrin et al.

|                                                                                                                                                                                                                                                                                                                                                                              |     |                                                                                    |     |
|------------------------------------------------------------------------------------------------------------------------------------------------------------------------------------------------------------------------------------------------------------------------------------------------------------------------------------------------------------------------------|-----|------------------------------------------------------------------------------------|-----|
| Human                                                                                                                                                                                                                                                                                                                                                                        | 1   | MYRRSYVFQTRKEQYEHAEASRAAEPEPAdEGWAGATSLAALQGLGERVAAHVQRARALEQRHAGLRRQLDAFQRLGE     | 80  |
| Cow                                                                                                                                                                                                                                                                                                                                                                          | 1   | MYRRSYVFQTRKEQYERAEAPRAAEPDRLA-EARAAAPNLAALQGLGERVAAHVQRARALEQRHAVLRRQLDAFQRLDE    | 79  |
| Rat                                                                                                                                                                                                                                                                                                                                                                          | 1   | MYRRSYVFQARQERYERAQAPGPTAQPG-----GTAPGLAALQAGLGERVAAQVQRARAIQQRHAGLRRQLYAFQRLGE    | 73  |
| <b>Coil 1A conserved motif</b>                                                                                                                                                                                                                                                                                                                                               |     |                                                                                    |     |
| Human                                                                                                                                                                                                                                                                                                                                                                        | 81  | LAGPEDALARQVESNRQVRDLEAEFARLERQGTAEQRALDEFRSKYENECQCQLLKEMLERLNKEADEALLHNLRLQL     | 160 |
| Cow                                                                                                                                                                                                                                                                                                                                                                          | 80  | LAGPEDALARHVEGNRQARDLAAERTRLERQGAEAQRALDEFRSKYENECQCQLLKEMLERLNKEADEALLRNLRQLI     | 159 |
| Rat                                                                                                                                                                                                                                                                                                                                                                          | 74  | QPGPEEALARHVEANLQARDLAAEHARLERQEAEAQRALDEFRSKYENECQCQLVLKEMLERLNKEADEALLRNHLQL     | 153 |
| Human                                                                                                                                                                                                                                                                                                                                                                        | 161 | EAQFLQDDISAAKDRHKKNLLEVQTYISILQQIIHTTPPASIVTSGMREEKLLTEREVAALRSQLEEGREVLSHLQAQRV   | 240 |
| Cow                                                                                                                                                                                                                                                                                                                                                                          | 160 | EAQFLQDDISAAKDRYKKNLLEIQTYVTILQQIIQTTPQAAITSGMREEKLLTEREAAALQCQLEDGREMICLLQAQRT    | 239 |
| Rat                                                                                                                                                                                                                                                                                                                                                                          | 154 | EAQFLQADISVAKDRYKKNLLEIQTYITILQQIIQTAPQVSLVTGGMREEKLLTEREVAALRNQLDEGREAVTHLQAQKA   | 233 |
| Human                                                                                                                                                                                                                                                                                                                                                                        | 241 | ELQAQTTTLEQAIKSAHECYDDEIQLYNEQIETLRKEIEETERVLEKSSYDCRQLAVAQQTILKNELRYHRIETIEGNRL   | 320 |
| Cow                                                                                                                                                                                                                                                                                                                                                                          | 240 | ELQAQTAALQAIKSAHECYDDEIQLYNEQIDTLRKEIEEAERSLERSYDCRQLVAVQQTILKNELRYHRIETIEGNRL     | 319 |
| Rat                                                                                                                                                                                                                                                                                                                                                                          | 234 | ELQAQTTALEQAIKSAHECYDDEIQLYNGQIENLRKEIEEAERSLERSYDCRQLAVAQQTILKNELRYHRIETIEGNRL    | 313 |
| <b>Coil 2 conserved motif</b>                                                                                                                                                                                                                                                                                                                                                |     |                                                                                    |     |
| Human                                                                                                                                                                                                                                                                                                                                                                        | 321 | TSAFIETPIPLFTQSHGVSLSLTSGGKDLTRALQDITAAKPRQKALPKNVPRRKEIITKDKTNGALEDAPLKGLEDTKLV   | 400 |
| Cow                                                                                                                                                                                                                                                                                                                                                                          | 320 | SSAFIETPIPLFTQSHGVSLSLTSGGKDLTRAVQDITAAKPRQLKGLPKNLPKRKEMVAKDRADEILEETLLRGPEDMKPG  | 399 |
| Rat                                                                                                                                                                                                                                                                                                                                                                          | 314 | SSVFIETPIPLFTQSHGVSLSLTSGGKDLTRAVQDITAAKPRQKALPKSLPKRKEIIAQDKVDETLEDAPLKTLPQEPKAV  | 393 |
| Human                                                                                                                                                                                                                                                                                                                                                                        | 401 | QVVLKEESESKEFESES-KEVSPLTQEGAPEDVDPGGQISKAFGKLYRKVKKEKVRSPKE--PETPTELYTKERHVLVTGDA | 477 |
| Cow                                                                                                                                                                                                                                                                                                                                                                          | 400 | RVVIKEEGESKLEPGD-EEASPTTQEGAPEDVDPGGKISKAFGKLGKMIKEKVKGPKE--PEPPADLYTKGRYVMVSGDG   | 476 |
| Rat                                                                                                                                                                                                                                                                                                                                                                          | 394 | QGELTGDGDSQLGAGGgHEVSP-TQEGGPEVDPDSSQISKAFGKLCVKVKERVSGHKEpvPEPPADLFTKGRHILVTGES   | 472 |
| <div style="display: flex; justify-content: center; align-items: center;"> <div style="text-align: center;"> <p><b>N-Terminal Domain</b> ←</p> </div> <div style="text-align: center;"> <p>Caspase site</p> </div> <div style="text-align: center;"> <p>Myristoylation Sequence</p> </div> <div style="text-align: center;"> <p>→ <b>C-Terminal Domain</b></p> </div> </div> |     |                                                                                    |     |
| Human                                                                                                                                                                                                                                                                                                                                                                        | 478 | NYVDPRFYVSSITAKGGVAVSVAEDSVLYDGQVEPSPESPKEPPLENGQVGLQEKEDGQPIDQQPIDKEIEP-----DGAE  | 552 |
| Cow                                                                                                                                                                                                                                                                                                                                                                          | 477 | SFVDPGFCVFSVPKAGGVVSKGDDSVPPDSGVEPSPQQPEPPLLEGQGGPQEKEDGLKEEGGPPEGKGEppegkgDSVK    | 556 |
| Rat                                                                                                                                                                                                                                                                                                                                                                          | 473 | SFVDPEFYSSSIPARGGVVVSIEEDSMHHDGHVEPSPGQPMPPVENGQGVFQGREGAHNSHQVTDK-----NGIR        | 543 |
| Human                                                                                                                                                                                                                                                                                                                                                                        | 553 | LEGP---EEKREGEERDEES-RRPCAMVTPGAEEPSIPEPPKPAADQDGAEVLGTRSRSLPEKGP-----             | 613 |
| Cow                                                                                                                                                                                                                                                                                                                                                                          | 557 | EEGGPP-EGKGDGVK--EEG-GPPEGKGDGVKEEGGPPEGKGDGVKKEGEPPEGKGEGLKEEEGPlqkkedgrpptphpa   | 632 |
| Rat                                                                                                                                                                                                                                                                                                                                                                          | 544 | AKEPKDLEEKDDDSRKDDAaRRPCFVIIIPGPDGPSTTHSQTSGSNQGGPEGPGSKSSSLAKSP-----              | 608 |
| Human                                                                                                                                                                                                                                                                                                                                                                        | 614 | -----PKALAYKTVE                                                                    | 623 |
| Cow                                                                                                                                                                                                                                                                                                                                                                          | 633 | dkgdeknakelkg1qgkqddqkeegargpcpmvapgpegpstprsqgpqvilggseghgarsgsrlarspPRKLAYEKVE   | 712 |
| Rat                                                                                                                                                                                                                                                                                                                                                                          | 609 | -----SKALSFKKVE                                                                    | 618 |
| Human                                                                                                                                                                                                                                                                                                                                                                        | 624 | VVESIEKISTESIQTYEETAVIVETMIGTKSDKKKSGEKSS-----                                     | 665 |
| Cow                                                                                                                                                                                                                                                                                                                                                                          | 713 | VMESIEKFSTESIQTYEETAVIVETMIEKTKANKKKLGEKGSSEA--                                    | 757 |
| Rat                                                                                                                                                                                                                                                                                                                                                                          | 619 | VVESIEKISTESIQTYEETSVIVETVIGTKGNKKP-GEKSSNAka                                      | 664 |

Figure S1: Alignment of BFSP1 protein sequences.

A

| Species | GraBCas PREDICTION<br>(Responsible Caspase)                       | CasCleave 2.0<br>PREDICTION          | CONSENSUS            |
|---------|-------------------------------------------------------------------|--------------------------------------|----------------------|
| Human   | DVPD (2, 3, 7, 8)<br>IEPD (1, 2, 4, 5, 8)<br>EERD (2, 4, 6, 8, 9) | DVPD<br>EKED<br>IEPD<br>EERD<br>ADQD | DVPD<br>IEPD<br>EERD |
| Bovine  | DVPD (2, 3, 7, 8)<br>SFVD (7)                                     | DVPD<br>SFVD<br>EKED<br>DKGD         | DVPD<br>SFVD         |
| Rat     | DVPD (1, 2, 4, 5, 8)<br>SFVD (7)<br>IEED (4, 5, 8, 9)<br>EEKD (8) | DVPD<br>IEED<br>MHHD                 | DVPD                 |

B

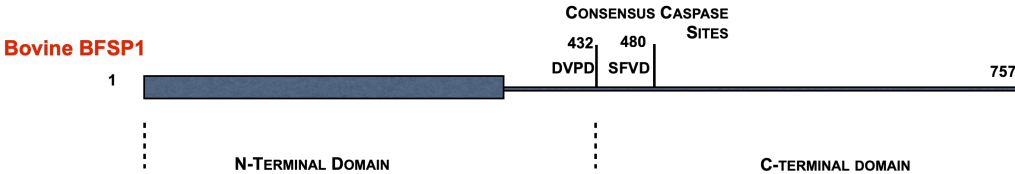

C

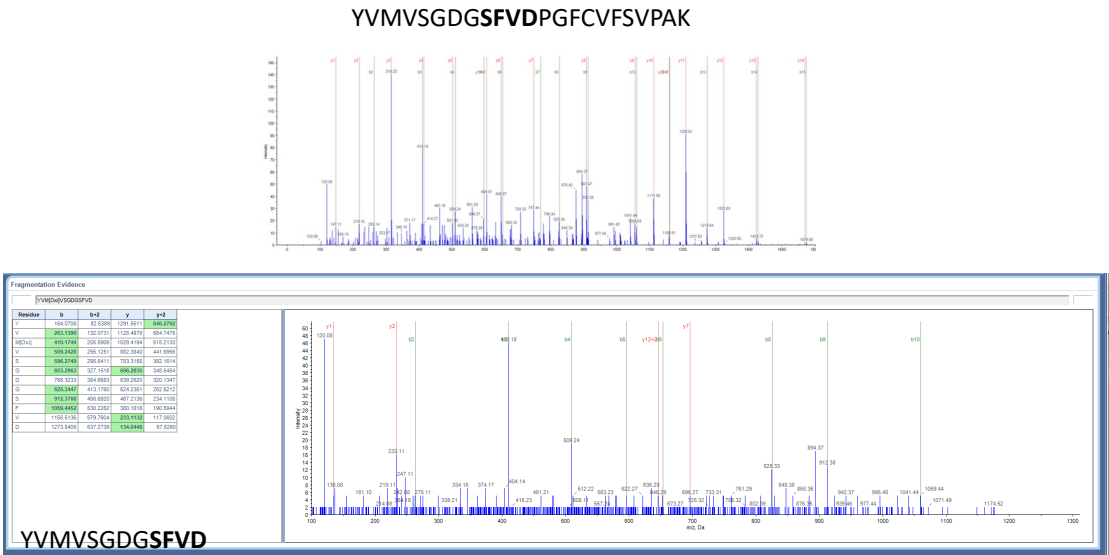



*Supplementary Figure S2: Identification of a second Caspase Cleavage Site (SVFD) in bovine BFSP1.*

- A) Identification and conservation of potential caspase recognition sites in the C-terminal sequences distal to the myristoylation sequence in human and bovine BFSP1 using GrabCas [55] and CasCleave 2 [56].
- B) Schematic comparing the predicted human and bovine caspase cleavage sites and the proteomic strategy to identify the bovine BFSP1 434 and 480 sites.
- C) Identification of a second caspase cleavage site in the C-terminal sequences of bovine BFSP1 at residue 480. Bovine lens membranes from the lens cortex were subjected to trypsin cleavage, removal of SDS and then MS-MS identification of the peptides eluted in ReX-Buffer 4 [52]. The search focused on tryptic peptides lacking a C-terminal arginine or lysine. The analysis identified a new caspase site at residues 477-480 (SFVD) in bovine BFSP1.

**T** Helix type: alpha

**Q** Full sequence:

**D** MYRRSYVFQTRKEQYEHAEASRAAEPPERPADEGWAGATSLAALQGLGERVAHVQRRARALEQRHAGLRRQLDAFQRLGE  
**E** LAGPEDALARQVESNRQVRDLEAERARLERQGTAEQALDEFRSKYENECQQLLKEMLERLNKEADEALLHNLRLQL  
**E** EAQFLQDDISAAKDRHKKNLLEVQTYISILQOIHTTTPASIVTSGMREEKLLTEREVAALRSQLEEGREVLSHLQAQRV  
**S** ELQAQTTTLEQAIIKSAHECYDDEIQLYNEQIETLRKEIEETERVLEKSSYDCRQLAVAQQTTLKNELDRYHRIEIEGNRL  
**A** TSAFIETPIPLFTQSHGVSLSTGSGGKDLTRALQDITAAKPRQKALPKNVPRRKEIITKDKTNGALEDAPLKGLEDTKL  
 QVVLKEESESKFESESKVSPLTQEGAPEDVDPGGQISKGFGKLYRKVKEKVRSPKEPETPTELYTKERHVLVTGDANYV  
 DPRFYVSSITAKGGVAVSVSAEDSVLYDGQVEPSPSPKPPLENGQVGLQEKEDGQPIDQQPIDKEIEPDGAELEGPEEKR  
 EGEERDEESRRPCAMVTPGAEEPSIPEPPKPAADQDGAEVLGTRSRSLPEKGPPKALAYKTVEVVESIEKISTESIQTYE  
 ETAVIVETMIGTKTKSDKKKSSEKSS

Sequence length: 665 a.a.

Analysis window: 18 a.a.

| 434GGQISKGFGKLYRKVKEK451    |                                |                           |
|-----------------------------|--------------------------------|---------------------------|
| Physico-chemical properties | Polar residues + GLY           | Nonpolar residues         |
| Hydrophobicity <H>          | Polar residues + GLY (n / %)   | Nonpolar residues (n / %) |
| 0.034                       | 13 / 72.22                     | 5 / 27.78                 |
| Hydrophobic moment <μH>     | Uncharged residues + GLY       | Aromatic residues         |
| 0.539                       | GLN 1, SER 1, GLY 4            | TYR 1, PHE 1,             |
| Net charge z                | Charged residues               | Special residues          |
| 5                           | LYS 5, ARG 1, GLU 1,           | CYS 0, PRO 0              |
|                             | Hydrophobic face : L I V F G Y |                           |

[Go to screening](#)

[Manual mutation](#)

[GA mutation](#)

[Click to enlarge](#)

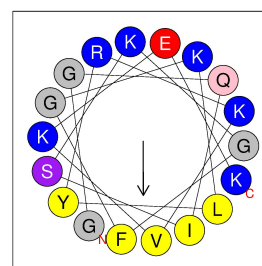

| 435GQISKGFGKLYRKVKEKV452    |                              |                           |
|-----------------------------|------------------------------|---------------------------|
| Physico-chemical properties | Polar residues + GLY         | Nonpolar residues         |
| Hydrophobicity <H>          | Polar residues + GLY (n / %) | Nonpolar residues (n / %) |
| 0.102                       | 12 / 66.67                   | 6 / 33.33                 |

[Click to enlarge](#)

*Supplementary Figure S3: Output from the HeliQuest analysis for the human BFSP1 sequence spanning residues 434-665.*

**Hydrophobic moment  $\langle \mu_H \rangle$**   
0.598  
**Net charge  $z$**   
5

**Uncharged residues + GLY**  
GLN 1, SER 1, GLY 3  
**Charged residues**  
LYS 5, ARG 1, GLU 1,  
**Hydrophobic face : L I V F V Y**

**Aromatic residues**  
TYR 1, PHE 1,  
**Special residues**  
CYS 0, PRO 0

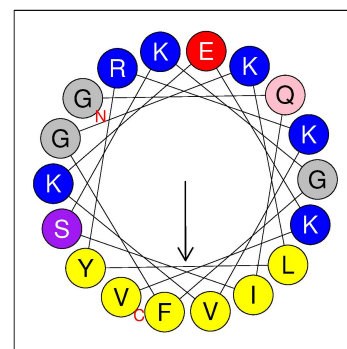

[Go to screening](#)

[Manual mutation](#)

[GA mutation](#)

436 **QISKGFGKLYRKVKEKVR** 453

**Physico-chemical properties**

**Hydrophobicity  $\langle H \rangle$**

0.046

**Hydrophobic moment  $\langle \mu_H \rangle$**

0.634

**Net charge  $z$**

6

**Polar residues + GLY**

**Polar residues + GLY (n / %)**

12 / 66.67

**Uncharged residues + GLY**

GLN 1, SER 1, GLY 2

**Charged residues**

LYS 5, ARG 2, GLU 1,

**Hydrophobic face : L I V F V Y**

**Nonpolar residues**

**Nonpolar residues (n / %)**

6 / 33.33

**Aromatic residues**

TYR 1, PHE 1,

**Special residues**

CYS 0, PRO 0

[Click to enlarge](#)

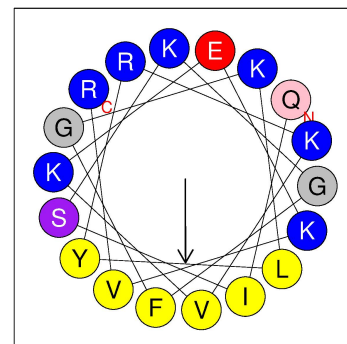

[Go to screening](#)

[Manual mutation](#)

[GA mutation](#)

437 **ISKGFGKLYRKVKEKVR** 454

**Physico-chemical properties**

**Hydrophobicity  $\langle H \rangle$**

0.056

**Hydrophobic moment  $\langle \mu_H \rangle$**

0.628

**Net charge  $z$**

6

**Polar residues + GLY**

**Polar residues + GLY (n / %)**

12 / 66.67

**Uncharged residues + GLY**

SER 2, GLY 2

**Charged residues**

LYS 5, ARG 2, GLU 1,

**Hydrophobic face : L I V F V Y**

**Nonpolar residues**

**Nonpolar residues (n / %)**

6 / 33.33

**Aromatic residues**

TYR 1, PHE 1,

**Special residues**

CYS 0, PRO 0

[Click to enlarge](#)

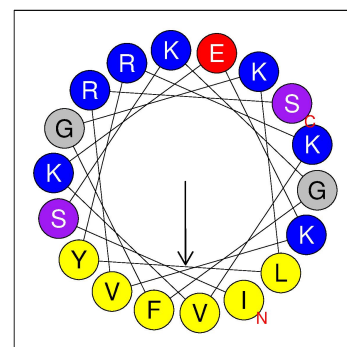

[Go to screening](#)

[Manual mutation](#)

[GA mutation](#)

438 **SKGFGKLYRKVKEKVRSP** 455

**Physico-chemical properties**

**Hydrophobicity  $\langle H \rangle$**

-0.004

**Hydrophobic moment  $\langle \mu_H \rangle$**

0.575

**Net charge  $z$**

6

**Polar residues + GLY**

**Polar residues + GLY (n / %)**

12 / 66.67

**Uncharged residues + GLY**

SER 2, GLY 2

**Charged residues**

LYS 5, ARG 2, GLU 1,

**Hydrophobic face : L P V F V Y**

**Nonpolar residues**

**Nonpolar residues (n / %)**

6 / 33.33

**Aromatic residues**

TYR 1, PHE 1,

**Special residues**

CYS 0, PRO 1

[Click to enlarge](#)

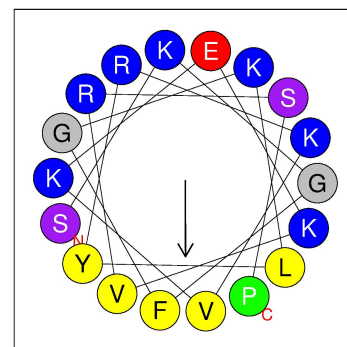

[Go to screening](#)

[Manual mutation](#)

[GA mutation](#)

439 **KGFGKLYRKVKEKVRSPK** 456

**Physico-chemical properties**

**Hydrophobicity  $\langle H \rangle$**

-0.057

**Polar residues + GLY**

**Polar residues + GLY (n / %)**

12 / 66.67

**Nonpolar residues**

**Nonpolar residues (n / %)**

6 / 33.33

[Click to enlarge](#)

**Hydrophobic moment  $\langle \mu_H \rangle$**   
0.560  
**Net charge  $z$**   
7

**Uncharged residues + GLY**  
SER 1, GLY 2  
**Charged residues**  
LYS 6, ARG 2, GLU 1,  
**Hydrophobic face : L P V F V Y**

**Aromatic residues**  
TYR 1, PHE 1,  
**Special residues**  
CYS 0, PRO 1

[Go to screening](#)

[Manual mutation](#)

[GA mutation](#)

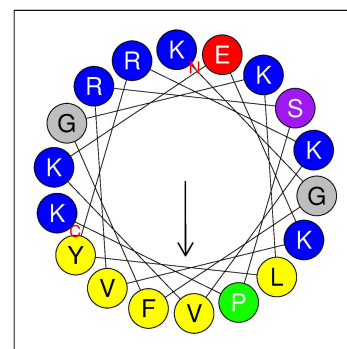

440 **GFGKLYRKVKKEKVRSPKE**<sub>457</sub>

**Physico-chemical properties**  
**Hydrophobicity  $\langle H \rangle$**   
-0.038  
**Hydrophobic moment  $\langle \mu_H \rangle$**   
0.541  
**Net charge  $z$**   
5

**Polar residues + GLY**  
**Polar residues + GLY (n / %)**  
12 / 66.67  
**Uncharged residues + GLY**  
SER 1, GLY 2  
**Charged residues**  
LYS 5, ARG 2, GLU 2,  
**Hydrophobic face : L P V F V Y**

**Nonpolar residues**  
**Nonpolar residues (n / %)**  
6 / 33.33  
**Aromatic residues**  
TYR 1, PHE 1,  
**Special residues**  
CYS 0, PRO 1

[Go to screening](#)

[Manual mutation](#)

[GA mutation](#)

[Click to enlarge](#)

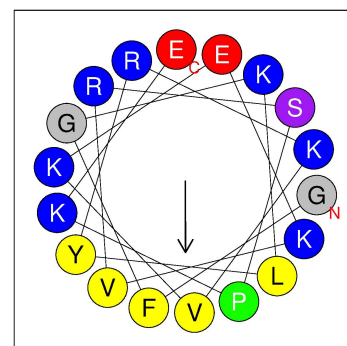

441 **FGKLYRKVKKEKVRSPKEP**<sub>458</sub>

**Physico-chemical properties**  
**Hydrophobicity  $\langle H \rangle$**   
0.002  
**Hydrophobic moment  $\langle \mu_H \rangle$**   
0.547  
**Net charge  $z$**   
5

**Polar residues + GLY**  
**Polar residues + GLY (n / %)**  
11 / 61.11  
**Uncharged residues + GLY**  
SER 1, GLY 1  
**Charged residues**  
LYS 5, ARG 2, GLU 2,  
**Hydrophobic face : L P V F V Y**

**Nonpolar residues**  
**Nonpolar residues (n / %)**  
7 / 38.89  
**Aromatic residues**  
TYR 1, PHE 1,  
**Special residues**  
CYS 0, PRO 2

[Go to screening](#)

[Manual mutation](#)

[GA mutation](#)

[Click to enlarge](#)

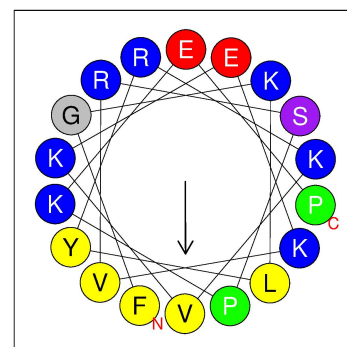

442 **GKLYRKVKKEKVRSPKEPE**<sub>459</sub>

**Physico-chemical properties**  
**Hydrophobicity  $\langle H \rangle$**   
-0.133  
**Hydrophobic moment  $\langle \mu_H \rangle$**   
0.423  
**Net charge  $z$**   
4

**Polar residues + GLY**  
**Polar residues + GLY (n / %)**  
12 / 66.67  
**Uncharged residues + GLY**  
SER 1, GLY 1  
**Charged residues**  
LYS 5, ARG 2, GLU 3,  
**Hydrophobic face : none**

**Nonpolar residues**  
**Nonpolar residues (n / %)**  
6 / 33.33  
**Aromatic residues**  
TYR 1,  
**Special residues**  
CYS 0, PRO 2

[Go to screening](#)

[Manual mutation](#)

[GA mutation](#)

[Click to enlarge](#)

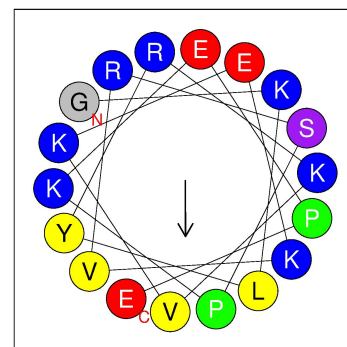

443 **KLYRKVKKEKVRSPKEPET**<sub>460</sub>

**Physico-chemical properties**  
**Hydrophobicity  $\langle H \rangle$**   
-0.118

**Polar residues + GLY**  
**Polar residues + GLY (n / %)**  
12 / 66.67

**Nonpolar residues**  
**Nonpolar residues (n / %)**  
6 / 33.33

[Click to enlarge](#)

**Hydrophobic moment  $\langle \mu_H \rangle$** 

0.414

**Net charge  $z$** 

4

**Uncharged residues + GLY**

SER 1, THR 1, GLY 0

**Charged residues**

LYS 5, ARG 2, GLU 3,

**Hydrophobic face : none****Aromatic residues**

TYR 1,

**Special residues**

CYS 0, PRO 2

[Go to screening](#)[Manual mutation](#)[GA mutation](#)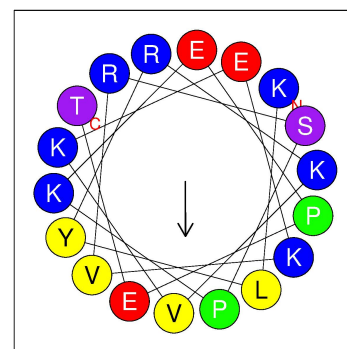

444LYRKVKEKVRSPKEPETP461

**Physico-chemical properties****Hydrophobicity  $\langle H \rangle$** 

-0.023

**Hydrophobic moment  $\langle \mu_H \rangle$** 

0.353

**Net charge  $z$** 

3

**Polar residues + GLY****Polar residues + GLY (n / %)**

11 / 61.11

**Uncharged residues + GLY**

SER 1, THR 1, GLY 0

**Charged residues**

LYS 4, ARG 2, GLU 3,

**Hydrophobic face : none****Nonpolar residues****Nonpolar residues (n / %)**

7 / 38.89

**Aromatic residues**

TYR 1,

**Special residues**

CYS 0, PRO 3

[Click to enlarge](#)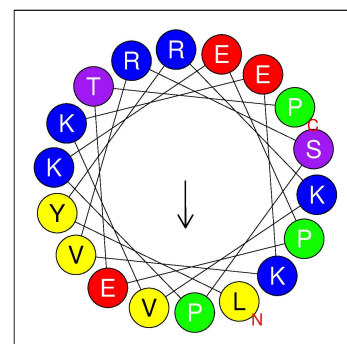[Go to screening](#)[Manual mutation](#)[GA mutation](#)

445YRKVKEKVRSPKEPETPT462

**Physico-chemical properties****Hydrophobicity  $\langle H \rangle$** 

-0.103

**Hydrophobic moment  $\langle \mu_H \rangle$** 

0.282

**Net charge  $z$** 

3

**Polar residues + GLY****Polar residues + GLY (n / %)**

12 / 66.67

**Uncharged residues + GLY**

SER 1, THR 2, GLY 0

**Charged residues**

LYS 4, ARG 2, GLU 3,

**Hydrophobic face : none****Nonpolar residues****Nonpolar residues (n / %)**

6 / 33.33

**Aromatic residues**

TYR 1,

**Special residues**

CYS 0, PRO 3

[Click to enlarge](#)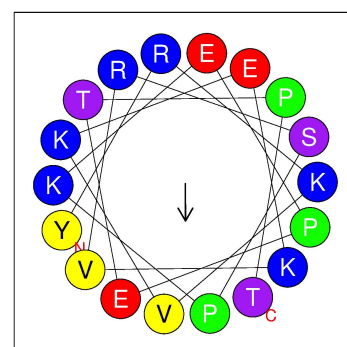[Go to screening](#)[Manual mutation](#)[GA mutation](#)

446RKVKEKVRSPKEPETPTE463

**Physico-chemical properties****Hydrophobicity  $\langle H \rangle$** 

-0.192

**Hydrophobic moment  $\langle \mu_H \rangle$** 

0.264

**Net charge  $z$** 

2

**Polar residues + GLY****Polar residues + GLY (n / %)**

13 / 72.22

**Uncharged residues + GLY**

SER 1, THR 2, GLY 0

**Charged residues**

LYS 4, ARG 2, GLU 4,

**Hydrophobic face : none****Nonpolar residues****Nonpolar residues (n / %)**

5 / 27.78

**Aromatic residues****Special residues**

CYS 0, PRO 3

[Click to enlarge](#)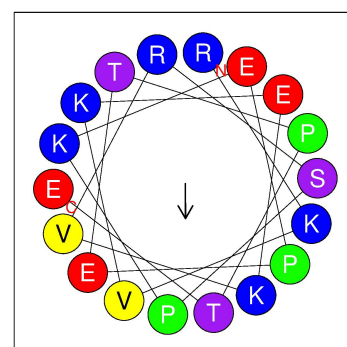[Go to screening](#)[Manual mutation](#)[GA mutation](#)

447KVKEKVRSPKEPETPTTEL464

**Physico-chemical properties****Hydrophobicity  $\langle H \rangle$** 

-0.042

**Polar residues + GLY****Polar residues + GLY (n / %)**

12 / 66.67

**Nonpolar residues****Nonpolar residues (n / %)**

6 / 33.33

[Click to enlarge](#)

**Hydrophobic moment <math>\langle \mu\_H \rangle</math>**

0.117

**Net charge  $z$** 

1

**Uncharged residues + GLY**

SER 1, THR 2, GLY 0

**Charged residues**

LYS 4, ARG 1, GLU 4,

**Hydrophobic face : none****Aromatic residues****Special residues**

CYS 0, PRO 3

[Go to screening](#)[Manual mutation](#)[GA mutation](#)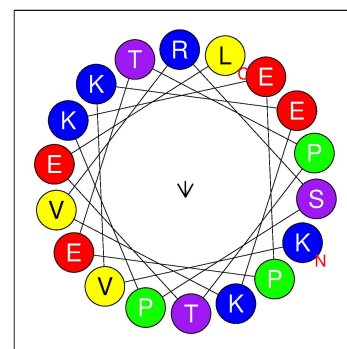

448VKEKVRSPKEPETPTELY465

**Physico-chemical properties****Hydrophobicity <math>\langle H \rangle</math>**

0.067

**Hydrophobic moment <math>\langle \mu\_H \rangle</math>**

0.193

**Net charge  $z$** 

0

**Polar residues + GLY****Polar residues + GLY (n / %)**

11 / 61.11

**Uncharged residues + GLY**

SER 1, THR 2, GLY 0

**Charged residues**

LYS 3, ARG 1, GLU 4,

**Hydrophobic face : none****Nonpolar residues****Nonpolar residues (n / %)**

7 / 38.89

**Aromatic residues**

TYR 1,

**Special residues**

CYS 0, PRO 3

[Click to enlarge](#)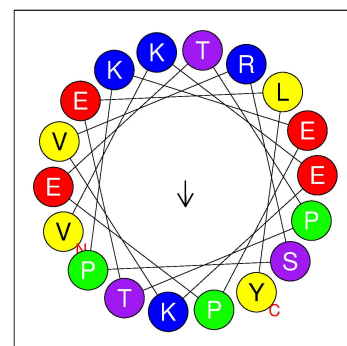[Go to screening](#)[Manual mutation](#)[GA mutation](#)

449KEKVRSPKEPETPTELYT466

**Physico-chemical properties****Hydrophobicity <math>\langle H \rangle</math>**

0.013

**Hydrophobic moment <math>\langle \mu\_H \rangle</math>**

0.179

**Net charge  $z$** 

0

**Polar residues + GLY****Polar residues + GLY (n / %)**

12 / 66.67

**Uncharged residues + GLY**

SER 1, THR 3, GLY 0

**Charged residues**

LYS 3, ARG 1, GLU 4,

**Hydrophobic face : none****Nonpolar residues****Nonpolar residues (n / %)**

6 / 33.33

**Aromatic residues**

TYR 1,

**Special residues**

CYS 0, PRO 3

[Click to enlarge](#)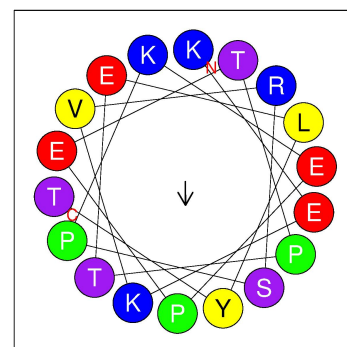[Go to screening](#)[Manual mutation](#)[GA mutation](#)

450EKVRSPKEPETPTELYTK467

**Physico-chemical properties****Hydrophobicity <math>\langle H \rangle</math>**

0.013

**Hydrophobic moment <math>\langle \mu\_H \rangle</math>**

0.179

**Net charge  $z$** 

0

**Polar residues + GLY****Polar residues + GLY (n / %)**

12 / 66.67

**Uncharged residues + GLY**

SER 1, THR 3, GLY 0

**Charged residues**

LYS 3, ARG 1, GLU 4,

**Hydrophobic face : none****Nonpolar residues****Nonpolar residues (n / %)**

6 / 33.33

**Aromatic residues**

TYR 1,

**Special residues**

CYS 0, PRO 3

[Click to enlarge](#)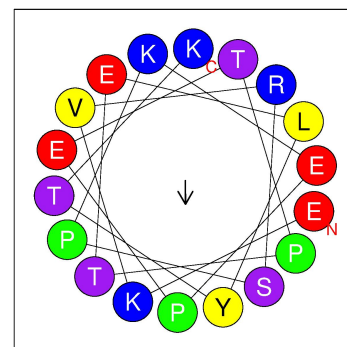[Go to screening](#)[Manual mutation](#)[GA mutation](#)

451KVRSPKEPETPTELYTKE468

**Physico-chemical properties****Hydrophobicity <math>\langle H \rangle</math>**

0.013

**Polar residues + GLY****Polar residues + GLY (n / %)**

12 / 66.67

**Nonpolar residues****Nonpolar residues (n / %)**

6 / 33.33

[Click to enlarge](#)



**Hydrophobic moment  $\langle \mu_H \rangle$** 

0.179

**Net charge  $z$** 

0

**Uncharged residues + GLY**

SER 1, THR 3, GLY 0

**Charged residues**

LYS 3, ARG 1, GLU 4,

**Hydrophobic face : none****Aromatic residues**

TYR 1,

**Special residues**

CYS 0, PRO 3

[Go to screening](#)[Manual mutation](#)[GA mutation](#)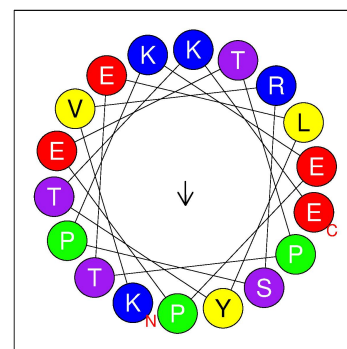

452VRSPKEPETPTELYTKER469

**Physico-chemical properties****Hydrophobicity  $\langle H \rangle$** 

0.012

**Hydrophobic moment  $\langle \mu_H \rangle$** 

0.178

**Net charge  $z$** 

0

**Polar residues + GLY****Polar residues + GLY (n / %)**

12 / 66.67

**Uncharged residues + GLY**

SER 1, THR 3, GLY 0

**Charged residues**

LYS 2, ARG 2, GLU 4,

**Hydrophobic face : none****Nonpolar residues****Nonpolar residues (n / %)**

6 / 33.33

**Aromatic residues**

TYR 1,

**Special residues**

CYS 0, PRO 3

[Go to screening](#)[Manual mutation](#)[GA mutation](#)[Click to enlarge](#)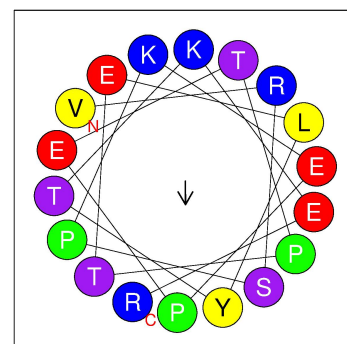

453RSPKEPETPTELYTKERH470

**Physico-chemical properties****Hydrophobicity  $\langle H \rangle$** 

-0.048

**Hydrophobic moment  $\langle \mu_H \rangle$** 

0.217

**Net charge  $z$** 

0

**Polar residues + GLY****Polar residues + GLY (n / %)**

13 / 72.22

**Uncharged residues + GLY**

HIS 1, SER 1, THR 3, GLY 0

**Charged residues**

LYS 2, ARG 2, GLU 4,

**Hydrophobic face : none****Nonpolar residues****Nonpolar residues (n / %)**

5 / 27.78

**Aromatic residues**

TYR 1,

**Special residues**

CYS 0, PRO 3

[Go to screening](#)[Manual mutation](#)[GA mutation](#)[Click to enlarge](#)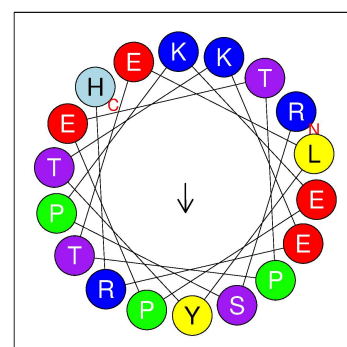

454SPKEPETPTELYTKERHV471

**Physico-chemical properties****Hydrophobicity  $\langle H \rangle$** 

0.076

**Hydrophobic moment  $\langle \mu_H \rangle$** 

0.182

**Net charge  $z$** 

-1

**Polar residues + GLY****Polar residues + GLY (n / %)**

12 / 66.67

**Uncharged residues + GLY**

HIS 1, SER 1, THR 3, GLY 0

**Charged residues**

LYS 2, ARG 1, GLU 4,

**Hydrophobic face : none****Nonpolar residues****Nonpolar residues (n / %)**

6 / 33.33

**Aromatic residues**

TYR 1,

**Special residues**

CYS 0, PRO 3

[Go to screening](#)[Manual mutation](#)[GA mutation](#)[Click to enlarge](#)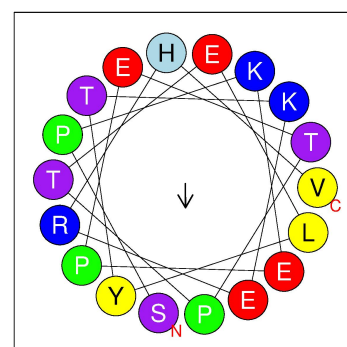

455PKEPETPTELYTKERHVL472

**Physico-chemical properties****Hydrophobicity  $\langle H \rangle$** 

0.172

**Polar residues + GLY****Polar residues + GLY (n / %)**

11 / 61.11

**Nonpolar residues****Nonpolar residues (n / %)**

7 / 38.89

**Hydrophobic moment  $\langle\mu_H\rangle$**   
0.278  
**Net charge  $z$**   
-1

**Uncharged residues + GLY**  
HIS 1, THR 3, GLY 0  
**Charged residues**  
LYS 2, ARG 1, GLU 4,  
**Hydrophobic face : none**

**Aromatic residues**  
TYR 1,  
**Special residues**  
CYS 0, PRO 3

[Go to screening](#)

[Manual mutation](#)

[GA mutation](#)

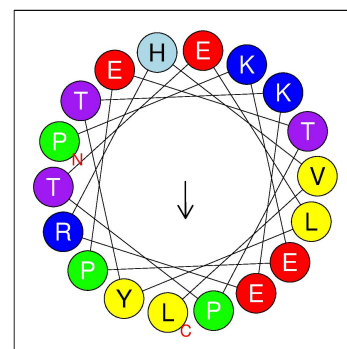

456 **KEPETPTELYTKERHVLV** 473

**Physico-chemical properties**  
**Hydrophobicity  $\langle H \rangle$**   
0.200  
**Hydrophobic moment  $\langle\mu_H\rangle$**   
0.271  
**Net charge  $z$**   
-1

**Polar residues + GLY**  
**Polar residues + GLY (n / %)**  
11 / 61.11  
**Uncharged residues + GLY**  
HIS 1, THR 3, GLY 0  
**Charged residues**  
LYS 2, ARG 1, GLU 4,  
**Hydrophobic face : none**

**Nonpolar residues**  
**Nonpolar residues (n / %)**  
7 / 38.89  
**Aromatic residues**  
TYR 1,  
**Special residues**  
CYS 0, PRO 2

[Go to screening](#)

[Manual mutation](#)

[GA mutation](#)

[Click to enlarge](#)

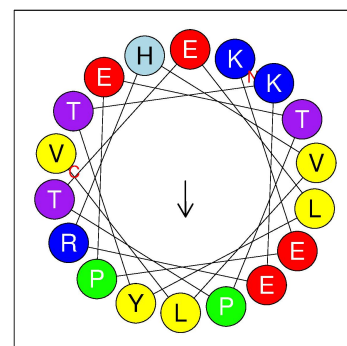

457 **EPETPTELYTKERHVLVT** 474

**Physico-chemical properties**  
**Hydrophobicity  $\langle H \rangle$**   
0.269  
**Hydrophobic moment  $\langle\mu_H\rangle$**   
0.208  
**Net charge  $z$**   
-2

**Polar residues + GLY**  
**Polar residues + GLY (n / %)**  
11 / 61.11  
**Uncharged residues + GLY**  
HIS 1, THR 4, GLY 0  
**Charged residues**  
LYS 1, ARG 1, GLU 4,  
**Hydrophobic face : none**

**Nonpolar residues**  
**Nonpolar residues (n / %)**  
7 / 38.89  
**Aromatic residues**  
TYR 1,  
**Special residues**  
CYS 0, PRO 2

[Go to screening](#)

[Manual mutation](#)

[GA mutation](#)

[Click to enlarge](#)

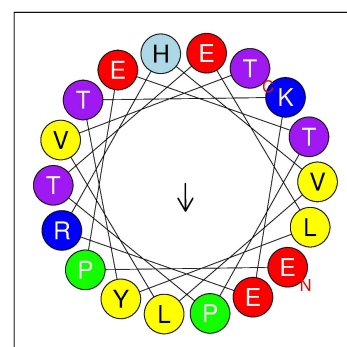

458 **PETPTELYTKERHVLVTG** 475

**Physico-chemical properties**  
**Hydrophobicity  $\langle H \rangle$**   
0.305  
**Hydrophobic moment  $\langle\mu_H\rangle$**   
0.232  
**Net charge  $z$**   
-1

**Polar residues + GLY**  
**Polar residues + GLY (n / %)**  
11 / 61.11  
**Uncharged residues + GLY**  
HIS 1, THR 4, GLY 1  
**Charged residues**  
LYS 1, ARG 1, GLU 3,  
**Hydrophobic face : none**

**Nonpolar residues**  
**Nonpolar residues (n / %)**  
7 / 38.89  
**Aromatic residues**  
TYR 1,  
**Special residues**  
CYS 0, PRO 2

[Go to screening](#)

[Manual mutation](#)

[GA mutation](#)

[Click to enlarge](#)

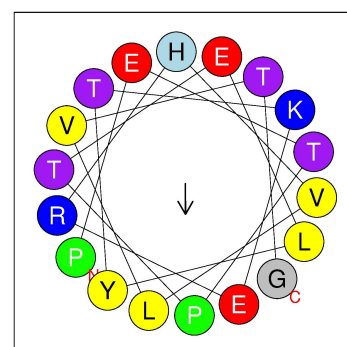

459 **ETPTELYTKERHVLVTGD** 476

**Physico-chemical properties**  
**Hydrophobicity  $\langle H \rangle$**   
0.222

**Polar residues + GLY**  
**Polar residues + GLY (n / %)**  
12 / 66.67

**Nonpolar residues**  
**Nonpolar residues (n / %)**  
6 / 33.33

[Click to enlarge](#)



**Hydrophobic moment <math>\langle \mu\_H \rangle</math>**

0.198

**Net charge  $z$** 

-2

**Uncharged residues + GLY**

HIS 1, THR 4, GLY 1

**Charged residues**

LYS 1, ARG 1, GLU 3, ASP 1,

**Hydrophobic face : none****Aromatic residues**

TYR 1,

**Special residues**

CYS 0, PRO 1

[Go to screening](#)[Manual mutation](#)[GA mutation](#)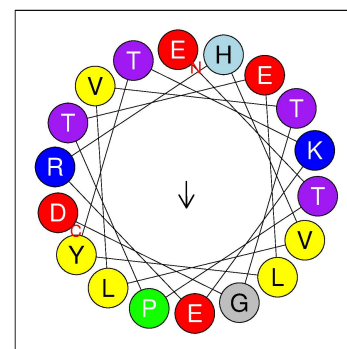

460TPTELYTKERHVLVTGDA477

**Physico-chemical properties****Hydrophobicity <math>\langle H \rangle</math>**

0.275

**Hydrophobic moment <math>\langle \mu\_H \rangle</math>**

0.145

**Net charge  $z$** 

-1

**Polar residues + GLY****Polar residues + GLY (n / %)**

11 / 61.11

**Uncharged residues + GLY**

HIS 1, THR 4, GLY 1

**Charged residues**

LYS 1, ARG 1, GLU 2, ASP 1,

**Hydrophobic face : none****Nonpolar residues****Nonpolar residues (n / %)**

7 / 38.89

**Aromatic residues**

TYR 1,

**Special residues**

CYS 0, PRO 1

[Click to enlarge](#)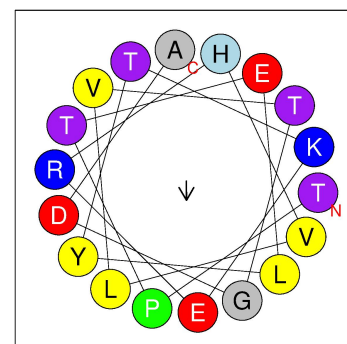[Go to screening](#)[Manual mutation](#)[GA mutation](#)

461PTELYTKERHVLVTGDAN478

**Physico-chemical properties****Hydrophobicity <math>\langle H \rangle</math>**

0.227

**Hydrophobic moment <math>\langle \mu\_H \rangle</math>**

0.149

**Net charge  $z$** 

-1

**Polar residues + GLY****Polar residues + GLY (n / %)**

11 / 61.11

**Uncharged residues + GLY**

HIS 1, THR 3, ASN 1, GLY 1

**Charged residues**

LYS 1, ARG 1, GLU 2, ASP 1,

**Hydrophobic face : none****Nonpolar residues****Nonpolar residues (n / %)**

7 / 38.89

**Aromatic residues**

TYR 1,

**Special residues**

CYS 0, PRO 1

[Click to enlarge](#)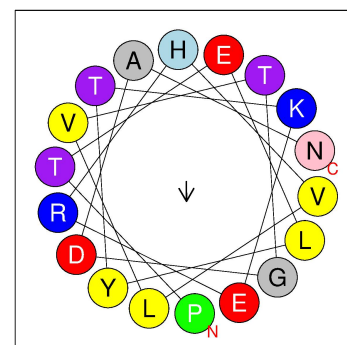[Go to screening](#)[Manual mutation](#)[GA mutation](#)

462TELYTKERHVLVTGDANY479

**Physico-chemical properties****Hydrophobicity <math>\langle H \rangle</math>**

0.241

**Hydrophobic moment <math>\langle \mu\_H \rangle</math>**

0.162

**Net charge  $z$** 

-1

**Polar residues + GLY****Polar residues + GLY (n / %)**

11 / 61.11

**Uncharged residues + GLY**

HIS 1, THR 3, ASN 1, GLY 1

**Charged residues**

LYS 1, ARG 1, GLU 2, ASP 1,

**Hydrophobic face : none****Nonpolar residues****Nonpolar residues (n / %)**

7 / 38.89

**Aromatic residues**

TYR 2,

**Special residues**

CYS 0, PRO 0

[Click to enlarge](#)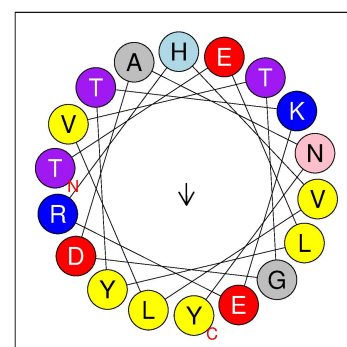[Go to screening](#)[Manual mutation](#)[GA mutation](#)

463ELYTKERHVLVTGDANYV480

**Physico-chemical properties****Hydrophobicity <math>\langle H \rangle</math>**

0.294

**Polar residues + GLY****Polar residues + GLY (n / %)**

10 / 55.56

**Nonpolar residues****Nonpolar residues (n / %)**

8 / 44.44

[Click to enlarge](#)

**Hydrophobic moment <math>\langle \mu\_H \rangle</math>**

0.165

**Net charge  $z$** 

-1

**Uncharged residues + GLY**

HIS 1, THR 2, ASN 1, GLY 1

**Charged residues**

LYS 1, ARG 1, GLU 2, ASP 1,

**Hydrophobic face : none****Aromatic residues**

TYR 2,

**Special residues**

CYS 0, PRO 0

[Go to screening](#)[Manual mutation](#)[GA mutation](#)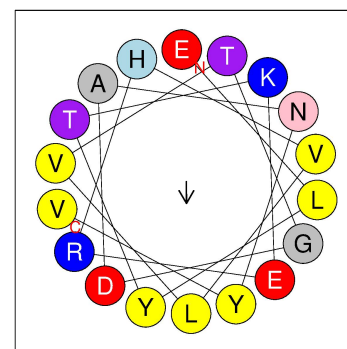464 **LYTKERHVLVTGDANYVD** 481**Physico-chemical properties****Hydrophobicity <math>\langle H \rangle</math>**

0.287

**Hydrophobic moment <math>\langle \mu\_H \rangle</math>**

0.172

**Net charge  $z$** 

-1

**Polar residues + GLY****Polar residues + GLY (n / %)**

10 / 55.56

**Uncharged residues + GLY**

HIS 1, THR 2, ASN 1, GLY 1

**Charged residues**

LYS 1, ARG 1, GLU 1, ASP 2,

**Hydrophobic face : none****Nonpolar residues****Nonpolar residues (n / %)**

8 / 44.44

**Aromatic residues**

TYR 2,

**Special residues**

CYS 0, PRO 0

[Click to enlarge](#)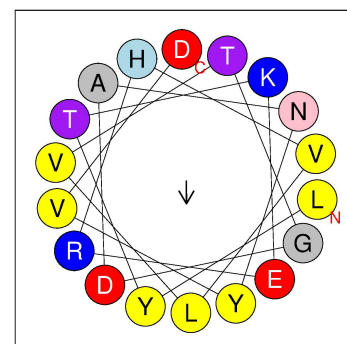[Go to screening](#)[Manual mutation](#)[GA mutation](#)465 **YTKERHVLVTGDANYVDP** 482**Physico-chemical properties****Hydrophobicity <math>\langle H \rangle</math>**

0.232

**Hydrophobic moment <math>\langle \mu\_H \rangle</math>**

0.173

**Net charge  $z$** 

-1

**Polar residues + GLY****Polar residues + GLY (n / %)**

10 / 55.56

**Uncharged residues + GLY**

HIS 1, THR 2, ASN 1, GLY 1

**Charged residues**

LYS 1, ARG 1, GLU 1, ASP 2,

**Hydrophobic face : none****Nonpolar residues****Nonpolar residues (n / %)**

8 / 44.44

**Aromatic residues**

TYR 2,

**Special residues**

CYS 0, PRO 1

[Click to enlarge](#)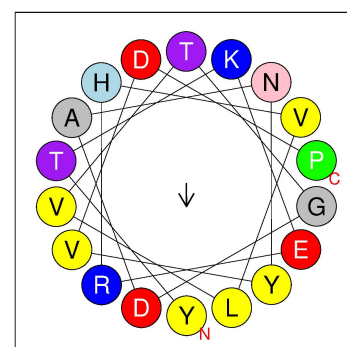[Go to screening](#)[Manual mutation](#)[GA mutation](#)466 **TKERHVLVTGDANYVDPR** 483**Physico-chemical properties****Hydrophobicity <math>\langle H \rangle</math>**

0.123

**Hydrophobic moment <math>\langle \mu\_H \rangle</math>**

0.064

**Net charge  $z$** 

0

**Polar residues + GLY****Polar residues + GLY (n / %)**

11 / 61.11

**Uncharged residues + GLY**

HIS 1, THR 2, ASN 1, GLY 1

**Charged residues**

LYS 1, ARG 2, GLU 1, ASP 2,

**Hydrophobic face : none****Nonpolar residues****Nonpolar residues (n / %)**

7 / 38.89

**Aromatic residues**

TYR 1,

**Special residues**

CYS 0, PRO 1

[Click to enlarge](#)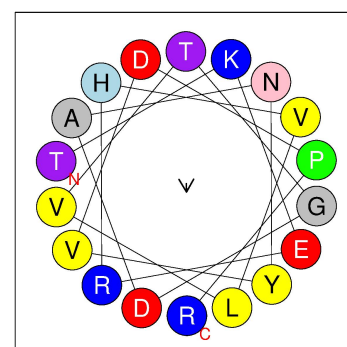[Go to screening](#)[Manual mutation](#)[GA mutation](#)467 **KERHVLVTGDANYVDPRF** 484**Physico-chemical properties****Hydrophobicity <math>\langle H \rangle</math>**

0.208

**Polar residues + GLY****Polar residues + GLY (n / %)**

10 / 55.56

**Nonpolar residues****Nonpolar residues (n / %)**

8 / 44.44

[Click to enlarge](#)

# O

**Hydrophobic face :** none

CYS 0, PRO 1

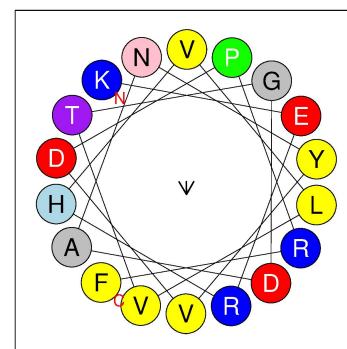

## GA mutation

-1

**Hydrophobic face :** none

CYS 0, PRO 1

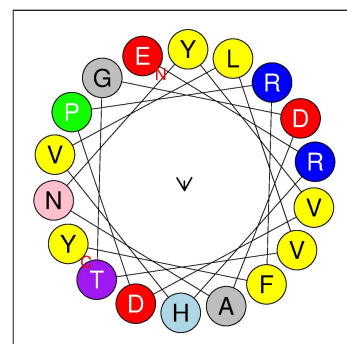

## GA mutation

O

**Hydrophobic face : V P G V Y L**

CYS 0, PRO 1

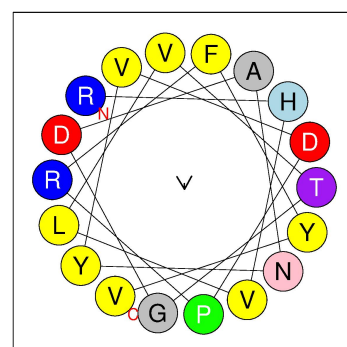

## GA mutation

-1

**Hydrophobic face : V P G V Y L**

CYS 0, PRO 1

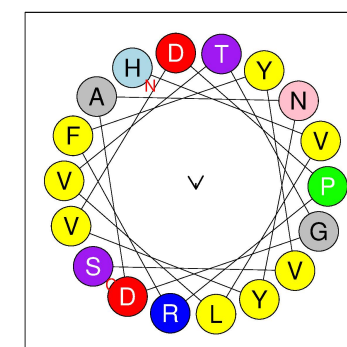

## GA mutation

10 / 55.56

Click to enlarge

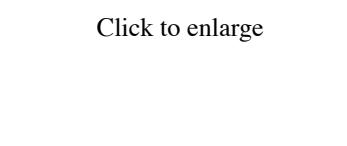

**Hydrophobic moment** < $\mu H$ >      **Uncharged residues + GLY**  
0.049      SER 2, THR 1, ASN 1, GLY 1  
**Net charge**  $z$       **Charged residues**  
-1      ARG 1, ASP 2,  
**Hydrophobic face** : V P G V Y L

**Aromatic residues**  
TYR 2, PHE 1,  
**Special residues**  
CYS 0, PRO 1

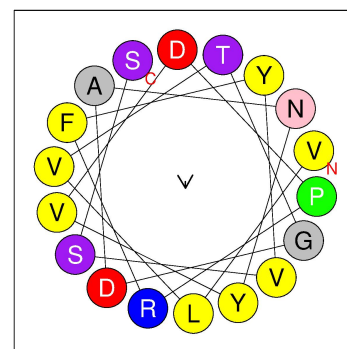

[Go to screening](#)

[Manual mutation](#)

[GA mutation](#)

472 LVTGDANYVDPRFYVSSI 489

**Physico-chemical properties**  
**Hydrophobicity** < $H$ >  
0.496  
**Hydrophobic moment** < $\mu H$ >  
0.052  
**Net charge**  $z$   
-1  
**Polar residues + GLY**  
**Polar residues + GLY (n / %)**  
8 / 44.44  
**Uncharged residues + GLY**  
SER 2, THR 1, ASN 1, GLY 1  
**Charged residues**  
ARG 1, ASP 2,  
**Hydrophobic face** : I P G V Y L

**Nonpolar residues**  
**Nonpolar residues (n / %)**  
10 / 55.56  
**Aromatic residues**  
TYR 2, PHE 1,  
**Special residues**  
CYS 0, PRO 1

[Click to enlarge](#)

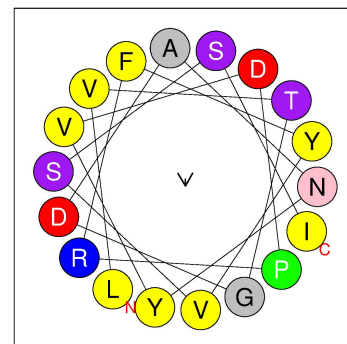

[Go to screening](#)

[Manual mutation](#)

[GA mutation](#)

473 VTGDANYVDPRFYVSSIT 490

**Physico-chemical properties**  
**Hydrophobicity** < $H$ >  
0.416  
**Hydrophobic moment** < $\mu H$ >  
0.046  
**Net charge**  $z$   
-1  
**Polar residues + GLY**  
**Polar residues + GLY (n / %)**  
9 / 50.00  
**Uncharged residues + GLY**  
SER 2, THR 2, ASN 1, GLY 1  
**Charged residues**  
ARG 1, ASP 2,  
**Hydrophobic face** : I P G V Y

**Nonpolar residues**  
**Nonpolar residues (n / %)**  
9 / 50.00  
**Aromatic residues**  
TYR 2, PHE 1,  
**Special residues**  
CYS 0, PRO 1

[Click to enlarge](#)

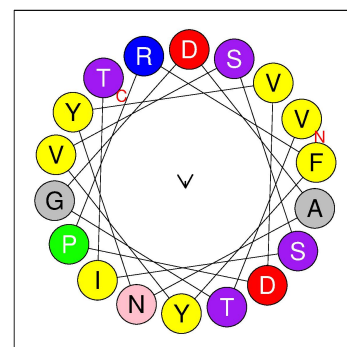

[Go to screening](#)

[Manual mutation](#)

[GA mutation](#)

474 TGDANYVDPRFYVSSITA 491

**Physico-chemical properties**  
**Hydrophobicity** < $H$ >  
0.366  
**Hydrophobic moment** < $\mu H$ >  
0.083  
**Net charge**  $z$   
-1  
**Polar residues + GLY**  
**Polar residues + GLY (n / %)**  
9 / 50.00  
**Uncharged residues + GLY**  
SER 2, THR 2, ASN 1, GLY 1  
**Charged residues**  
ARG 1, ASP 2,  
**Hydrophobic face** : I P G V Y

**Nonpolar residues**  
**Nonpolar residues (n / %)**  
9 / 50.00  
**Aromatic residues**  
TYR 2, PHE 1,  
**Special residues**  
CYS 0, PRO 1

[Click to enlarge](#)

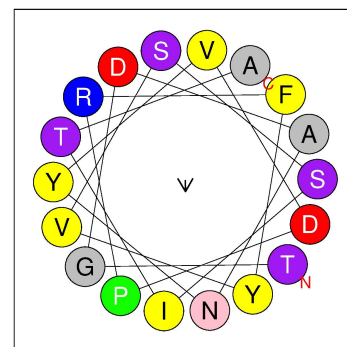

[Go to screening](#)

[Manual mutation](#)

[GA mutation](#)

475 GDANYVDPRFYVSSITAK 492

**Physico-chemical properties**  
**Hydrophobicity** < $H$ >  
0.296  
**Polar residues + GLY**  
**Polar residues + GLY (n / %)**  
9 / 50.00

**Nonpolar residues**  
**Nonpolar residues (n / %)**  
9 / 50.00

[Click to enlarge](#)

**Hydrophobic moment  $\langle \mu_H \rangle$**   
0.066  
**Net charge  $z$**   
0

**Uncharged residues + GLY**  
SER 2, THR 1, ASN 1, GLY 1  
**Charged residues**  
LYS 1, ARG 1, ASP 2,  
**Hydrophobic face : I P G V Y**

**Aromatic residues**  
TYR 2, PHE 1,  
**Special residues**  
CYS 0, PRO 1

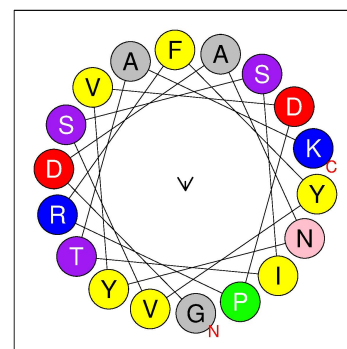

[Go to screening](#)

[Manual mutation](#)

[GA mutation](#)

476DANYVDPRFYVSSITAKG493

**Physico-chemical properties**  
**Hydrophobicity  $\langle H \rangle$**   
0.296  
**Hydrophobic moment  $\langle \mu_H \rangle$**   
0.066  
**Net charge  $z$**   
0

**Polar residues + GLY**  
**Polar residues + GLY (n / %)**  
9 / 50.00  
**Uncharged residues + GLY**  
SER 2, THR 1, ASN 1, GLY 1  
**Charged residues**  
LYS 1, ARG 1, ASP 2,  
**Hydrophobic face : I P G V Y**

**Nonpolar residues**  
**Nonpolar residues (n / %)**  
9 / 50.00  
**Aromatic residues**  
TYR 2, PHE 1,  
**Special residues**  
CYS 0, PRO 1

[Click to enlarge](#)

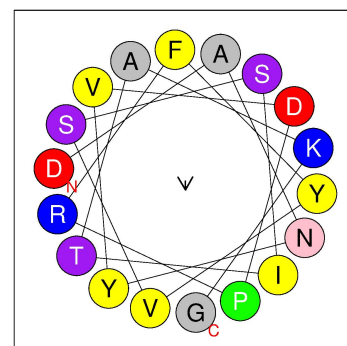

[Go to screening](#)

[Manual mutation](#)

[GA mutation](#)

477ANYVDPRFYVSSITAKGG494

**Physico-chemical properties**  
**Hydrophobicity  $\langle H \rangle$**   
0.339  
**Hydrophobic moment  $\langle \mu_H \rangle$**   
0.076  
**Net charge  $z$**   
1

**Polar residues + GLY**  
**Polar residues + GLY (n / %)**  
9 / 50.00  
**Uncharged residues + GLY**  
SER 2, THR 1, ASN 1, GLY 2  
**Charged residues**  
LYS 1, ARG 1, ASP 1,  
**Hydrophobic face : I P G V Y**

**Nonpolar residues**  
**Nonpolar residues (n / %)**  
9 / 50.00  
**Aromatic residues**  
TYR 2, PHE 1,  
**Special residues**  
CYS 0, PRO 1

[Click to enlarge](#)

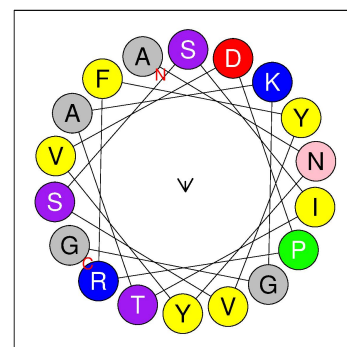

[Go to screening](#)

[Manual mutation](#)

[GA mutation](#)

478NYVDPRFYVSSITAKGGV495

**Physico-chemical properties**  
**Hydrophobicity  $\langle H \rangle$**   
0.389  
**Hydrophobic moment  $\langle \mu_H \rangle$**   
0.032  
**Net charge  $z$**   
1

**Polar residues + GLY**  
**Polar residues + GLY (n / %)**  
9 / 50.00  
**Uncharged residues + GLY**  
SER 2, THR 1, ASN 1, GLY 2  
**Charged residues**  
LYS 1, ARG 1, ASP 1,  
**Hydrophobic face : I P G V Y**

**Nonpolar residues**  
**Nonpolar residues (n / %)**  
9 / 50.00  
**Aromatic residues**  
TYR 2, PHE 1,  
**Special residues**  
CYS 0, PRO 1

[Click to enlarge](#)

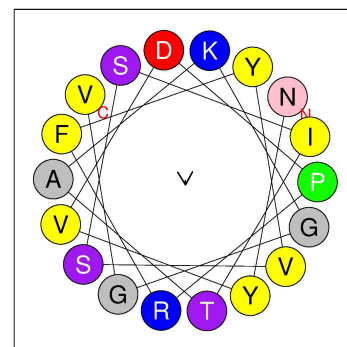

[Go to screening](#)

[Manual mutation](#)

[GA mutation](#)

479YVDPRFYVSSITAKGGVA496

**Physico-chemical properties**  
**Hydrophobicity  $\langle H \rangle$**   
0.440

**Polar residues + GLY**  
**Polar residues + GLY (n / %)**  
8 / 44.44

**Nonpolar residues**  
**Nonpolar residues (n / %)**  
10 / 55.56

[Click to enlarge](#)



**Hydrophobic moment**  $\langle \mu_H \rangle$  0.039  
**Net charge**  $z$  1

**Uncharged residues + GLY**  
 SER 2, THR 1, GLY 2

**Charged residues**  
 LYS 1, ARG 1, ASP 1,

**Hydrophobic face** : Y A I P G V Y

[Go to screening](#)

[Manual mutation](#)

**Aromatic residues**  
 TYR 2, PHE 1,

**Special residues**  
 CYS 0, PRO 1

[GA mutation](#)

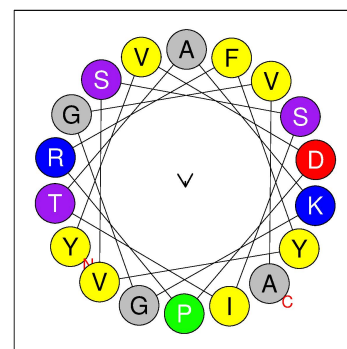

480 **VDPRFYVSSITAKGGVAV** 497

**Physico-chemical properties**  
**Hydrophobicity**  $\langle H \rangle$  0.454  
**Hydrophobic moment**  $\langle \mu_H \rangle$  0.048  
**Net charge**  $z$  1

**Polar residues + GLY**  
**Polar residues + GLY (n / %)** 8 / 44.44

**Uncharged residues + GLY**  
 SER 2, THR 1, GLY 2

**Charged residues**  
 LYS 1, ARG 1, ASP 1,

**Hydrophobic face** : Y A I P G V V

[Go to screening](#)

[Manual mutation](#)

**Nonpolar residues**  
**Nonpolar residues (n / %)** 10 / 55.56

**Aromatic residues**  
 TYR 1, PHE 1,

**Special residues**  
 CYS 0, PRO 1

[GA mutation](#)

[Click to enlarge](#)

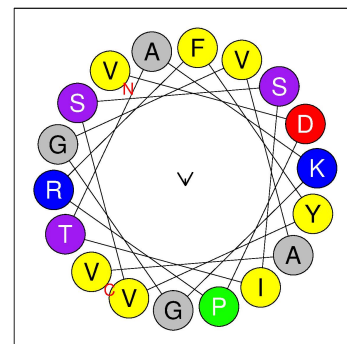

481 **DPRFYVSSITAKGGVAVS** 498

**Physico-chemical properties**  
**Hydrophobicity**  $\langle H \rangle$  0.384  
**Hydrophobic moment**  $\langle \mu_H \rangle$  0.113  
**Net charge**  $z$  1

**Polar residues + GLY**  
**Polar residues + GLY (n / %)** 9 / 50.00

**Uncharged residues + GLY**  
 SER 3, THR 1, GLY 2

**Charged residues**  
 LYS 1, ARG 1, ASP 1,

**Hydrophobic face** : Y A I P G V V

[Go to screening](#)

[Manual mutation](#)

**Nonpolar residues**  
**Nonpolar residues (n / %)** 9 / 50.00

**Aromatic residues**  
 TYR 1, PHE 1,

**Special residues**  
 CYS 0, PRO 1

[GA mutation](#)

[Click to enlarge](#)

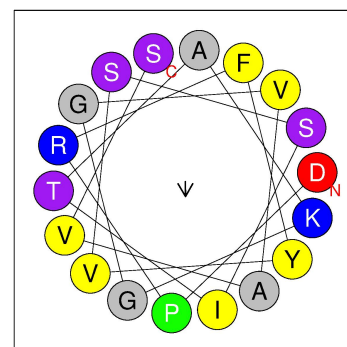

482 **PRFYVSSITAKGGVAVSV** 499

**Physico-chemical properties**  
**Hydrophobicity**  $\langle H \rangle$  0.495  
**Hydrophobic moment**  $\langle \mu_H \rangle$  0.152  
**Net charge**  $z$  2

**Polar residues + GLY**  
**Polar residues + GLY (n / %)** 8 / 44.44

**Uncharged residues + GLY**  
 SER 3, THR 1, GLY 2

**Charged residues**  
 LYS 1, ARG 1,

**Hydrophobic face** : Y A I P G V V

[Go to screening](#)

[Manual mutation](#)

**Nonpolar residues**  
**Nonpolar residues (n / %)** 10 / 55.56

**Aromatic residues**  
 TYR 1, PHE 1,

**Special residues**  
 CYS 0, PRO 1

[GA mutation](#)

[Click to enlarge](#)

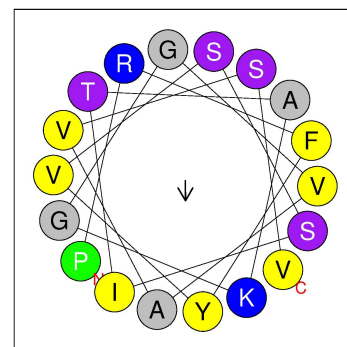

483 **RFYVSSITAKGGVAVSVA** 500

**Physico-chemical properties**  
**Hydrophobicity**  $\langle H \rangle$  0.472

**Polar residues + GLY**  
**Polar residues + GLY (n / %)** 8 / 44.44

[Click to enlarge](#)

**Nonpolar residues**  
**Nonpolar residues (n / %)** 10 / 55.56

|                                                            |                                         |                          |
|------------------------------------------------------------|-----------------------------------------|--------------------------|
| <b>Hydrophobic moment <math>\langle\mu_H\rangle</math></b> | <b>Uncharged residues + GLY</b>         | <b>Aromatic residues</b> |
| 0.140                                                      | SER 3, THR 1, GLY 2                     | TYR 1, PHE 1,            |
| <b>Net charge <math>z</math></b>                           | <b>Charged residues</b>                 | <b>Special residues</b>  |
| 2                                                          | LYS 1, ARG 1,                           | CYS 0, PRO 0             |
|                                                            | <b>Hydrophobic face : Y A I A G V V</b> |                          |

[Go to screening](#)
[Manual mutation](#)
[GA mutation](#)
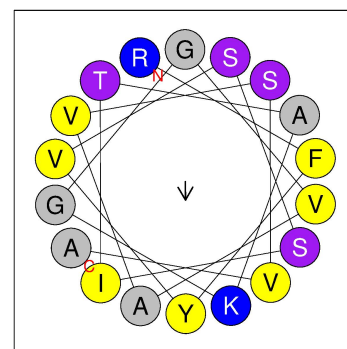

|                                                            |                                         |                                  |
|------------------------------------------------------------|-----------------------------------------|----------------------------------|
| 484 <b>FYVSSITAKGGVAVSVAE</b> 501                          |                                         |                                  |
| <b>Physico-chemical properties</b>                         | <b>Polar residues + GLY</b>             | <b>Nonpolar residues</b>         |
| <b>Hydrophobicity <math>\langle H \rangle</math></b>       | <b>Polar residues + GLY (n / %)</b>     | <b>Nonpolar residues (n / %)</b> |
| 0.493                                                      | 8 / 44.44                               | 10 / 55.56                       |
| <b>Hydrophobic moment <math>\langle\mu_H\rangle</math></b> | <b>Uncharged residues + GLY</b>         | <b>Aromatic residues</b>         |
| 0.120                                                      | SER 3, THR 1, GLY 2                     | TYR 1, PHE 1,                    |
| <b>Net charge <math>z</math></b>                           | <b>Charged residues</b>                 | <b>Special residues</b>          |
| 0                                                          | LYS 1, GLU 1,                           | CYS 0, PRO 0                     |
|                                                            | <b>Hydrophobic face : Y A I A G V V</b> |                                  |

[Click to enlarge](#)
[Go to screening](#)
[Manual mutation](#)
[GA mutation](#)
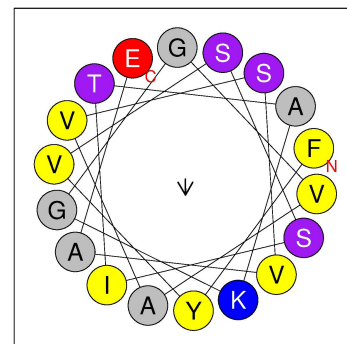

|                                                            |                                         |                                  |
|------------------------------------------------------------|-----------------------------------------|----------------------------------|
| 485 <b>YVSSITAKGGVAVSVAED</b> 502                          |                                         |                                  |
| <b>Physico-chemical properties</b>                         | <b>Polar residues + GLY</b>             | <b>Nonpolar residues</b>         |
| <b>Hydrophobicity <math>\langle H \rangle</math></b>       | <b>Polar residues + GLY (n / %)</b>     | <b>Nonpolar residues (n / %)</b> |
| 0.351                                                      | 9 / 50.00                               | 9 / 50.00                        |
| <b>Hydrophobic moment <math>\langle\mu_H\rangle</math></b> | <b>Uncharged residues + GLY</b>         | <b>Aromatic residues</b>         |
| 0.207                                                      | SER 3, THR 1, GLY 2                     | TYR 1,                           |
| <b>Net charge <math>z</math></b>                           | <b>Charged residues</b>                 | <b>Special residues</b>          |
| -1                                                         | LYS 1, GLU 1, ASP 1,                    | CYS 0, PRO 0                     |
|                                                            | <b>Hydrophobic face : Y A I A G V V</b> |                                  |

[Click to enlarge](#)
[Go to screening](#)
[Manual mutation](#)
[GA mutation](#)
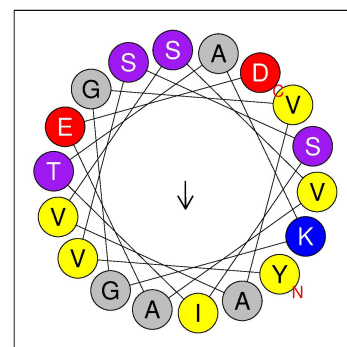

|                                                            |                                       |                                  |
|------------------------------------------------------------|---------------------------------------|----------------------------------|
| 486 <b>VSSITAKGGVAVSVAEDS</b> 503                          |                                       |                                  |
| <b>Physico-chemical properties</b>                         | <b>Polar residues + GLY</b>           | <b>Nonpolar residues</b>         |
| <b>Hydrophobicity <math>\langle H \rangle</math></b>       | <b>Polar residues + GLY (n / %)</b>   | <b>Nonpolar residues (n / %)</b> |
| 0.295                                                      | 10 / 55.56                            | 8 / 44.44                        |
| <b>Hydrophobic moment <math>\langle\mu_H\rangle</math></b> | <b>Uncharged residues + GLY</b>       | <b>Aromatic residues</b>         |
| 0.172                                                      | SER 4, THR 1, GLY 2                   |                                  |
| <b>Net charge <math>z</math></b>                           | <b>Charged residues</b>               | <b>Special residues</b>          |
| -1                                                         | LYS 1, GLU 1, ASP 1,                  | CYS 0, PRO 0                     |
|                                                            | <b>Hydrophobic face : A I A G V V</b> |                                  |

[Click to enlarge](#)
[Go to screening](#)
[Manual mutation](#)
[GA mutation](#)
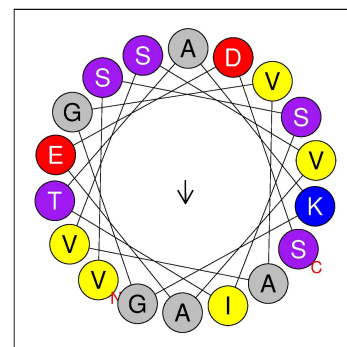

|                                                      |                                     |                                  |
|------------------------------------------------------|-------------------------------------|----------------------------------|
| 487 <b>SSITAKGGVAVSVAEDSV</b> 504                    |                                     |                                  |
| <b>Physico-chemical properties</b>                   | <b>Polar residues + GLY</b>         | <b>Nonpolar residues</b>         |
| <b>Hydrophobicity <math>\langle H \rangle</math></b> | <b>Polar residues + GLY (n / %)</b> | <b>Nonpolar residues (n / %)</b> |
| 0.295                                                | 10 / 55.56                          | 8 / 44.44                        |

[Click to enlarge](#)

|                                                            |                                       |                          |
|------------------------------------------------------------|---------------------------------------|--------------------------|
| <b>Hydrophobic moment <math>\langle\mu H\rangle</math></b> | <b>Uncharged residues + GLY</b>       | <b>Aromatic residues</b> |
| 0.172                                                      | SER 4, THR 1, GLY 2                   |                          |
| <b>Net charge <math>z</math></b>                           | <b>Charged residues</b>               | <b>Special residues</b>  |
| -1                                                         | LYS 1, GLU 1, ASP 1,                  | CYS 0, PRO 0             |
|                                                            | <b>Hydrophobic face : A I A G V V</b> |                          |

[Go to screening](#)
[Manual mutation](#)
[GA mutation](#)
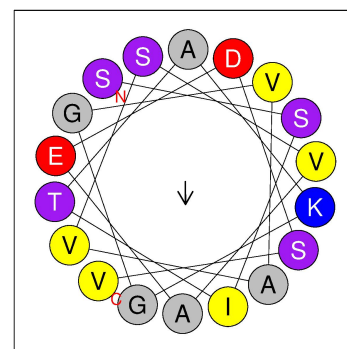

488 **SITAKGGVAVSVAEDSVL** 505

|                                                            |                                       |                                  |
|------------------------------------------------------------|---------------------------------------|----------------------------------|
| <b>Physico-chemical properties</b>                         | <b>Polar residues + GLY</b>           | <b>Nonpolar residues</b>         |
| <b>Hydrophobicity <math>\langle H \rangle</math></b>       | <b>Polar residues + GLY (n / %)</b>   | <b>Nonpolar residues (n / %)</b> |
| 0.392                                                      | 9 / 50.00                             | 9 / 50.00                        |
| <b>Hydrophobic moment <math>\langle\mu H\rangle</math></b> | <b>Uncharged residues + GLY</b>       | <b>Aromatic residues</b>         |
| 0.114                                                      | SER 3, THR 1, GLY 2                   |                                  |
| <b>Net charge <math>z</math></b>                           | <b>Charged residues</b>               | <b>Special residues</b>          |
| -1                                                         | LYS 1, GLU 1, ASP 1,                  | CYS 0, PRO 0                     |
|                                                            | <b>Hydrophobic face : A I A G V V</b> |                                  |

[Go to screening](#)
[Manual mutation](#)
[GA mutation](#)
[Click to enlarge](#)
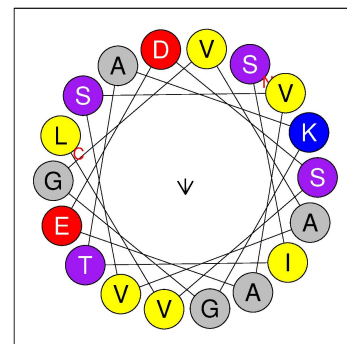

489 **ITAKGGVAVSVAEDSVLY** 506

|                                                            |                                       |                                  |
|------------------------------------------------------------|---------------------------------------|----------------------------------|
| <b>Physico-chemical properties</b>                         | <b>Polar residues + GLY</b>           | <b>Nonpolar residues</b>         |
| <b>Hydrophobicity <math>\langle H \rangle</math></b>       | <b>Polar residues + GLY (n / %)</b>   | <b>Nonpolar residues (n / %)</b> |
| 0.447                                                      | 8 / 44.44                             | 10 / 55.56                       |
| <b>Hydrophobic moment <math>\langle\mu H\rangle</math></b> | <b>Uncharged residues + GLY</b>       | <b>Aromatic residues</b>         |
| 0.071                                                      | SER 2, THR 1, GLY 2                   | TYR 1,                           |
| <b>Net charge <math>z</math></b>                           | <b>Charged residues</b>               | <b>Special residues</b>          |
| -1                                                         | LYS 1, GLU 1, ASP 1,                  | CYS 0, PRO 0                     |
|                                                            | <b>Hydrophobic face : A I A G V V</b> |                                  |

[Go to screening](#)
[Manual mutation](#)
[GA mutation](#)
[Click to enlarge](#)
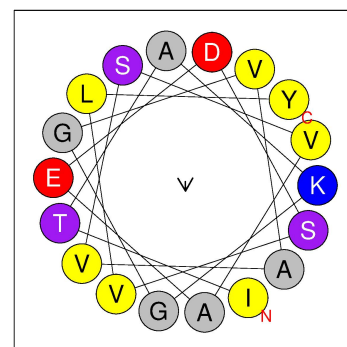

490 **TAKGGVAVSVAEDSVLYD** 507

|                                                            |                                     |                                  |
|------------------------------------------------------------|-------------------------------------|----------------------------------|
| <b>Physico-chemical properties</b>                         | <b>Polar residues + GLY</b>         | <b>Nonpolar residues</b>         |
| <b>Hydrophobicity <math>\langle H \rangle</math></b>       | <b>Polar residues + GLY (n / %)</b> | <b>Nonpolar residues (n / %)</b> |
| 0.304                                                      | 9 / 50.00                           | 9 / 50.00                        |
| <b>Hydrophobic moment <math>\langle\mu H\rangle</math></b> | <b>Uncharged residues + GLY</b>     | <b>Aromatic residues</b>         |
| 0.087                                                      | SER 2, THR 1, GLY 2                 | TYR 1,                           |
| <b>Net charge <math>z</math></b>                           | <b>Charged residues</b>             | <b>Special residues</b>          |
| -2                                                         | LYS 1, GLU 1, ASP 2,                | CYS 0, PRO 0                     |
|                                                            | <b>Hydrophobic face : none</b>      |                                  |

[Go to screening](#)
[Manual mutation](#)
[GA mutation](#)
[Click to enlarge](#)
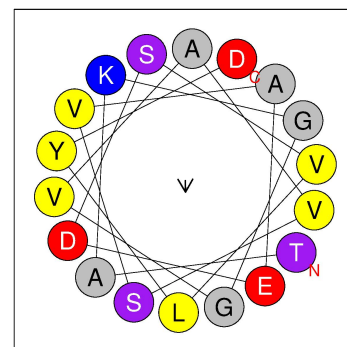

491 **AKGGVAVSVAEDSVLYDG** 508

|                                                      |                                     |                                  |
|------------------------------------------------------|-------------------------------------|----------------------------------|
| <b>Physico-chemical properties</b>                   | <b>Polar residues + GLY</b>         | <b>Nonpolar residues</b>         |
| <b>Hydrophobicity <math>\langle H \rangle</math></b> | <b>Polar residues + GLY (n / %)</b> | <b>Nonpolar residues (n / %)</b> |
| 0.290                                                | 9 / 50.00                           | 9 / 50.00                        |

[Click to enlarge](#)



**Hydrophobic moment <math>\langle \mu\_H \rangle</math>**

0.080

**Net charge  $z$** 

-2

**Uncharged residues + GLY**

SER 2, GLY 3

**Charged residues**

LYS 1, GLU 1, ASP 2,

**Hydrophobic face : none****Aromatic residues**

TYR 1,

**Special residues**

CYS 0, PRO 0

[Go to screening](#)[Manual mutation](#)[GA mutation](#)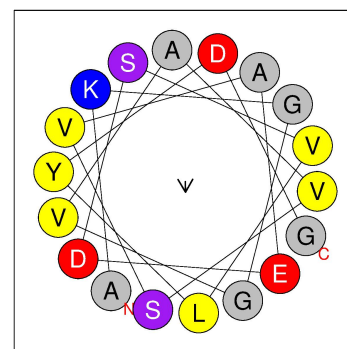492 **KGGVAVSVAEDSVLYDGQ** 509**Physico-chemical properties****Hydrophobicity <math>\langle H \rangle</math>**

0.261

**Hydrophobic moment <math>\langle \mu\_H \rangle</math>**

0.058

**Net charge  $z$** 

-2

**Polar residues + GLY****Polar residues + GLY (n / %)**

10 / 55.56

**Uncharged residues + GLY**

GLN 1, SER 2, GLY 3

**Charged residues**

LYS 1, GLU 1, ASP 2,

**Hydrophobic face : none****Nonpolar residues****Nonpolar residues (n / %)**

8 / 44.44

**Aromatic residues**

TYR 1,

**Special residues**

CYS 0, PRO 0

[Click to enlarge](#)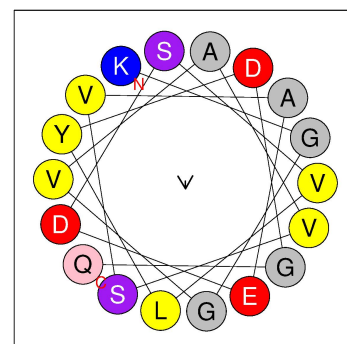[Go to screening](#)[Manual mutation](#)[GA mutation](#)493 **GGVAVSVAEDSVLYDGQV** 510**Physico-chemical properties****Hydrophobicity <math>\langle H \rangle</math>**

0.383

**Hydrophobic moment <math>\langle \mu\_H \rangle</math>**

0.077

**Net charge  $z$** 

-3

**Polar residues + GLY****Polar residues + GLY (n / %)**

9 / 50.00

**Uncharged residues + GLY**

GLN 1, SER 2, GLY 3

**Charged residues**

GLU 1, ASP 2,

**Hydrophobic face : none****Nonpolar residues****Nonpolar residues (n / %)**

9 / 50.00

**Aromatic residues**

TYR 1,

**Special residues**

CYS 0, PRO 0

[Click to enlarge](#)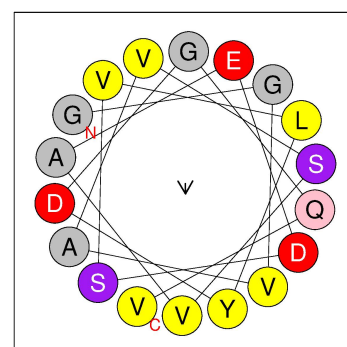[Go to screening](#)[Manual mutation](#)[GA mutation](#)494 **GVAVSVAEDSVLYDGQVE** 511**Physico-chemical properties****Hydrophobicity <math>\langle H \rangle</math>**

0.348

**Hydrophobic moment <math>\langle \mu\_H \rangle</math>**

0.101

**Net charge  $z$** 

-4

**Polar residues + GLY****Polar residues + GLY (n / %)**

9 / 50.00

**Uncharged residues + GLY**

GLN 1, SER 2, GLY 2

**Charged residues**

GLU 2, ASP 2,

**Hydrophobic face : none****Nonpolar residues****Nonpolar residues (n / %)**

9 / 50.00

**Aromatic residues**

TYR 1,

**Special residues**

CYS 0, PRO 0

[Click to enlarge](#)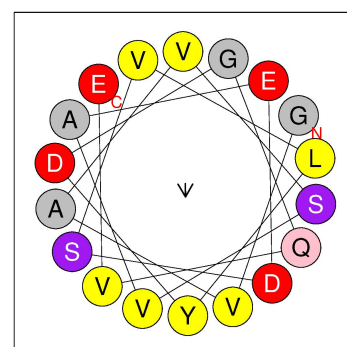[Go to screening](#)[Manual mutation](#)[GA mutation](#)495 **VAVSVAEDSVLYDGQVEP** 512**Physico-chemical properties****Hydrophobicity <math>\langle H \rangle</math>**

0.388

**Polar residues + GLY****Polar residues + GLY (n / %)**

8 / 44.44

**Nonpolar residues****Nonpolar residues (n / %)**

10 / 55.56

[Click to enlarge](#)

**Hydrophobic moment <math>\langle \mu\_H \rangle</math>**

0.087

**Net charge  $z$** 

-4

**Uncharged residues + GLY**

GLN 1, SER 2, GLY 1

**Charged residues**

GLU 2, ASP 2,

**Hydrophobic face : none****Aromatic residues**

TYR 1,

**Special residues**

CYS 0, PRO 1

[Go to screening](#)[Manual mutation](#)[GA mutation](#)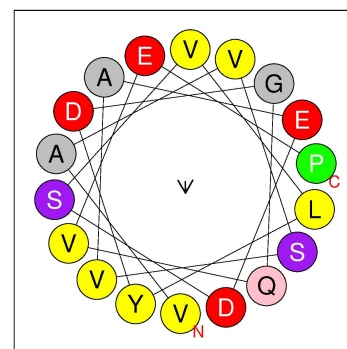

496AVSVAEDSVLYDGQVEPS513

**Physico-chemical properties****Hydrophobicity <math>\langle H \rangle</math>**

0.318

**Hydrophobic moment <math>\langle \mu\_H \rangle</math>**

0.017

**Net charge  $z$** 

-4

**Polar residues + GLY****Polar residues + GLY (n / %)**

9 / 50.00

**Uncharged residues + GLY**

GLN 1, SER 3, GLY 1

**Charged residues**

GLU 2, ASP 2,

**Hydrophobic face : none****Nonpolar residues****Nonpolar residues (n / %)**

9 / 50.00

**Aromatic residues**

TYR 1,

**Special residues**

CYS 0, PRO 1

[Click to enlarge](#)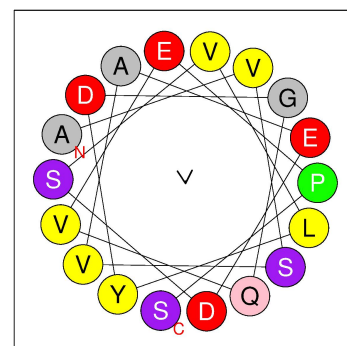[Go to screening](#)[Manual mutation](#)[GA mutation](#)

497VSVAEDSVLYDGQVEPSP514

**Physico-chemical properties****Hydrophobicity <math>\langle H \rangle</math>**

0.341

**Hydrophobic moment <math>\langle \mu\_H \rangle</math>**

0.023

**Net charge  $z$** 

-4

**Polar residues + GLY****Polar residues + GLY (n / %)**

9 / 50.00

**Uncharged residues + GLY**

GLN 1, SER 3, GLY 1

**Charged residues**

GLU 2, ASP 2,

**Hydrophobic face : none****Nonpolar residues****Nonpolar residues (n / %)**

9 / 50.00

**Aromatic residues**

TYR 1,

**Special residues**

CYS 0, PRO 2

[Click to enlarge](#)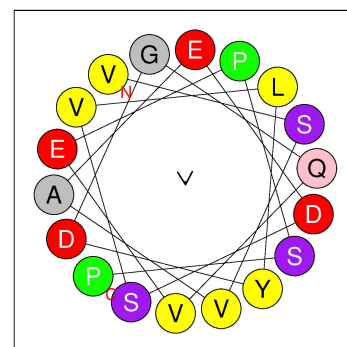[Go to screening](#)[Manual mutation](#)[GA mutation](#)

498SVAEDSVLYDGQVEPSPE515

**Physico-chemical properties****Hydrophobicity <math>\langle H \rangle</math>**

0.237

**Hydrophobic moment <math>\langle \mu\_H \rangle</math>**

0.123

**Net charge  $z$** 

-5

**Polar residues + GLY****Polar residues + GLY (n / %)**

10 / 55.56

**Uncharged residues + GLY**

GLN 1, SER 3, GLY 1

**Charged residues**

GLU 3, ASP 2,

**Hydrophobic face : none****Nonpolar residues****Nonpolar residues (n / %)**

8 / 44.44

**Aromatic residues**

TYR 1,

**Special residues**

CYS 0, PRO 2

[Click to enlarge](#)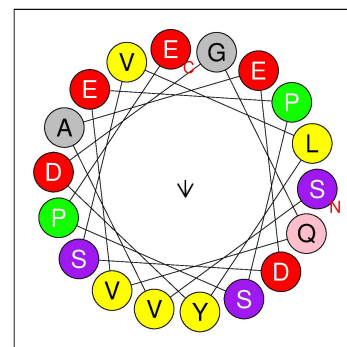[Go to screening](#)[Manual mutation](#)[GA mutation](#)

499VAEDSVLYDGQVEPSPES516

**Physico-chemical properties****Hydrophobicity <math>\langle H \rangle</math>**

0.237

**Polar residues + GLY****Polar residues + GLY (n / %)**

10 / 55.56

**Nonpolar residues****Nonpolar residues (n / %)**

8 / 44.44

[Click to enlarge](#)

**Hydrophobic moment  $\langle \mu_H \rangle$** 

0.123

**Net charge  $z$** 

-5

**Uncharged residues + GLY**

GLN 1, SER 3, GLY 1

**Charged residues**

GLU 3, ASP 2,

**Hydrophobic face : none****Aromatic residues**

TYR 1,

**Special residues**

CYS 0, PRO 2

[Go to screening](#)[Manual mutation](#)[GA mutation](#)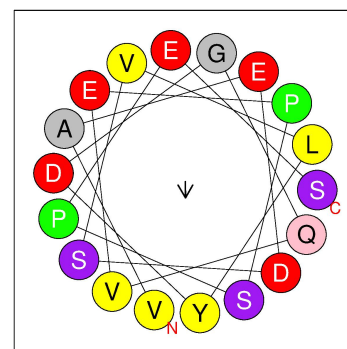

500AEDSVLYDGQVEPSPESP517

**Physico-chemical properties****Hydrophobicity  $\langle H \rangle$** 

0.209

**Hydrophobic moment  $\langle \mu_H \rangle$** 

0.096

**Net charge  $z$** 

-5

**Polar residues + GLY****Polar residues + GLY (n / %)**

10 / 55.56

**Uncharged residues + GLY**

GLN 1, SER 3, GLY 1

**Charged residues**

GLU 3, ASP 2,

**Hydrophobic face : none****Nonpolar residues****Nonpolar residues (n / %)**

8 / 44.44

**Aromatic residues**

TYR 1,

**Special residues**

CYS 0, PRO 3

[Go to screening](#)[Manual mutation](#)[GA mutation](#)[Click to enlarge](#)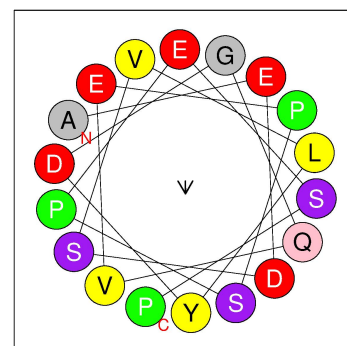

501EDSVLYDGQVEPSPESP518

**Physico-chemical properties****Hydrophobicity  $\langle H \rangle$** 

0.137

**Hydrophobic moment  $\langle \mu_H \rangle$** 

0.145

**Net charge  $z$** 

-4

**Polar residues + GLY****Polar residues + GLY (n / %)**

11 / 61.11

**Uncharged residues + GLY**

GLN 1, SER 3, GLY 1

**Charged residues**

LYS 1, GLU 3, ASP 2,

**Hydrophobic face : none****Nonpolar residues****Nonpolar residues (n / %)**

7 / 38.89

**Aromatic residues**

TYR 1,

**Special residues**

CYS 0, PRO 3

[Go to screening](#)[Manual mutation](#)[GA mutation](#)[Click to enlarge](#)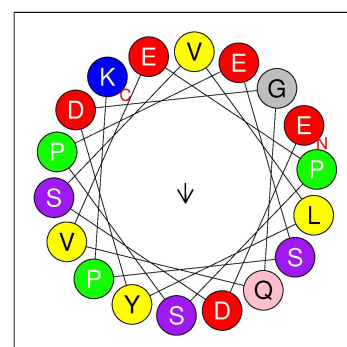

502DSVLYDGQVEPSPESP519

**Physico-chemical properties****Hydrophobicity  $\langle H \rangle$** 

0.213

**Hydrophobic moment  $\langle \mu_H \rangle$** 

0.130

**Net charge  $z$** 

-3

**Polar residues + GLY****Polar residues + GLY (n / %)**

10 / 55.56

**Uncharged residues + GLY**

GLN 1, SER 3, GLY 1

**Charged residues**

LYS 1, GLU 2, ASP 2,

**Hydrophobic face : none****Nonpolar residues****Nonpolar residues (n / %)**

8 / 44.44

**Aromatic residues**

TYR 1,

**Special residues**

CYS 0, PRO 4

[Go to screening](#)[Manual mutation](#)[GA mutation](#)[Click to enlarge](#)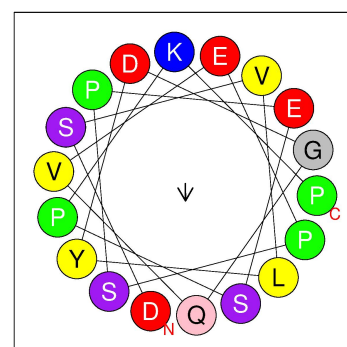

503SVLYDGQVEPSPESP520

**Physico-chemical properties****Hydrophobicity  $\langle H \rangle$** 

0.296

**Polar residues + GLY****Polar residues + GLY (n / %)**

9 / 50.00

**Nonpolar residues****Nonpolar residues (n / %)**

9 / 50.00

[Click to enlarge](#)

**Hydrophobic moment <math>\langle \mu\_H \rangle</math>**

0.211

**Net charge  $z$** 

-2

**Uncharged residues + GLY**

GLN 1, SER 3, GLY 1

**Charged residues**

LYS 1, GLU 2, ASP 1,

**Hydrophobic face :** none**Aromatic residues**

TYR 1,

**Special residues**

CYS 0, PRO 5

[Go to screening](#)[Manual mutation](#)[GA mutation](#)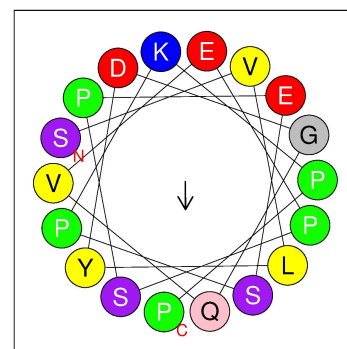

504 VLYDGQVEPSPESPKPPL521

**Physico-chemical properties****Hydrophobicity <math>\langle H \rangle</math>**

0.392

**Hydrophobic moment <math>\langle \mu\_H \rangle</math>**

0.201

**Net charge  $z$** 

-2

**Polar residues + GLY****Polar residues + GLY (n / %)**

8 / 44.44

**Uncharged residues + GLY**

GLN 1, SER 2, GLY 1

**Charged residues**

LYS 1, GLU 2, ASP 1,

**Hydrophobic face :** Y P V L P**Nonpolar residues****Nonpolar residues (n / %)**

10 / 55.56

**Aromatic residues**

TYR 1,

**Special residues**

CYS 0, PRO 5

[Click to enlarge](#)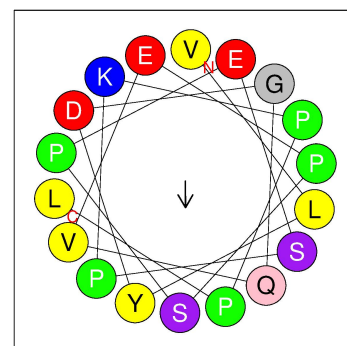[Go to screening](#)[Manual mutation](#)[GA mutation](#)

505 LYDGQVEPSPESPKPPL522

**Physico-chemical properties****Hydrophobicity <math>\langle H \rangle</math>**

0.289

**Hydrophobic moment <math>\langle \mu\_H \rangle</math>**

0.304

**Net charge  $z$** 

-3

**Polar residues + GLY****Polar residues + GLY (n / %)**

9 / 50.00

**Uncharged residues + GLY**

GLN 1, SER 2, GLY 1

**Charged residues**

LYS 1, GLU 3, ASP 1,

**Hydrophobic face :** Y P V L P**Nonpolar residues****Nonpolar residues (n / %)**

9 / 50.00

**Aromatic residues**

TYR 1,

**Special residues**

CYS 0, PRO 5

[Click to enlarge](#)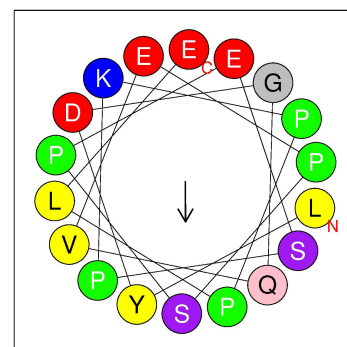[Go to screening](#)[Manual mutation](#)[GA mutation](#)

506 YDGQVEPSPESPKPPLEN523

**Physico-chemical properties****Hydrophobicity <math>\langle H \rangle</math>**

0.161

**Hydrophobic moment <math>\langle \mu\_H \rangle</math>**

0.306

**Net charge  $z$** 

-3

**Polar residues + GLY****Polar residues + GLY (n / %)**

10 / 55.56

**Uncharged residues + GLY**

GLN 1, SER 2, ASN 1, GLY 1

**Charged residues**

LYS 1, GLU 3, ASP 1,

**Hydrophobic face :** Y P V L P**Nonpolar residues****Nonpolar residues (n / %)**

8 / 44.44

**Aromatic residues**

TYR 1,

**Special residues**

CYS 0, PRO 5

[Click to enlarge](#)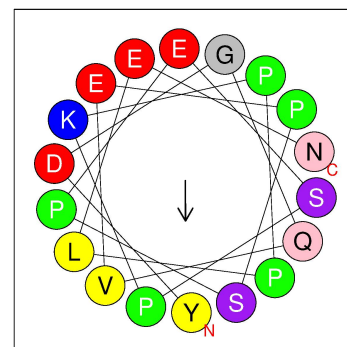[Go to screening](#)[Manual mutation](#)[GA mutation](#)

507 DGQVEPSPESPKPPLENG524

**Physico-chemical properties****Hydrophobicity <math>\langle H \rangle</math>**

0.108

**Polar residues + GLY****Polar residues + GLY (n / %)**

11 / 61.11

**Nonpolar residues****Nonpolar residues (n / %)**

7 / 38.89

[Click to enlarge](#)

Click to enlarge







**Hydrophobic moment  $\langle\mu_H\rangle$** 

0.138

**Net charge  $z$** 

-3

**Uncharged residues + GLY**

GLN 3, ASN 1, GLY 3

**Charged residues**

LYS 1, GLU 3, ASP 1,

**Hydrophobic face : none****Aromatic residues****Special residues**

CYS 0, PRO 3

[Go to screening](#)[Manual mutation](#)[GA mutation](#)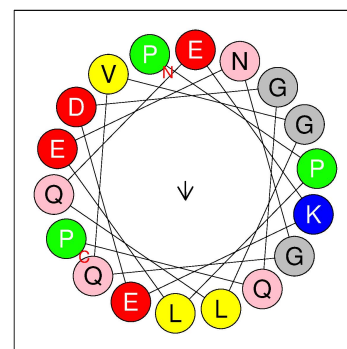520 **PLENGQVGLQEKEKGQPI** 537**Physico-chemical properties****Hydrophobicity  $\langle H \rangle$** 

0.162

**Hydrophobic moment  $\langle\mu_H\rangle$** 

0.082

**Net charge  $z$** 

-3

**Polar residues + GLY****Polar residues + GLY (n / %)**

12 / 66.67

**Uncharged residues + GLY**

GLN 3, ASN 1, GLY 3

**Charged residues**

LYS 1, GLU 3, ASP 1,

**Hydrophobic face : none****Nonpolar residues****Nonpolar residues (n / %)**

6 / 33.33

**Aromatic residues****Special residues**

CYS 0, PRO 2

[Click to enlarge](#)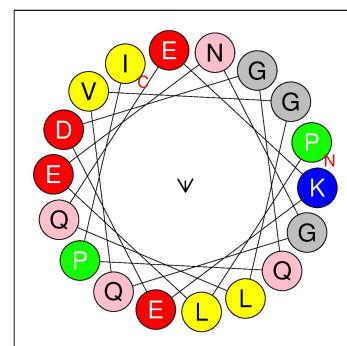[Go to screening](#)[Manual mutation](#)[GA mutation](#)521 **LENGQVGLQEKEKGQPID** 538**Physico-chemical properties****Hydrophobicity  $\langle H \rangle$** 

0.079

**Hydrophobic moment  $\langle\mu_H\rangle$** 

0.132

**Net charge  $z$** 

-4

**Polar residues + GLY****Polar residues + GLY (n / %)**

13 / 72.22

**Uncharged residues + GLY**

GLN 3, ASN 1, GLY 3

**Charged residues**

LYS 1, GLU 3, ASP 2,

**Hydrophobic face : none****Nonpolar residues****Nonpolar residues (n / %)**

5 / 27.78

**Aromatic residues****Special residues**

CYS 0, PRO 1

[Click to enlarge](#)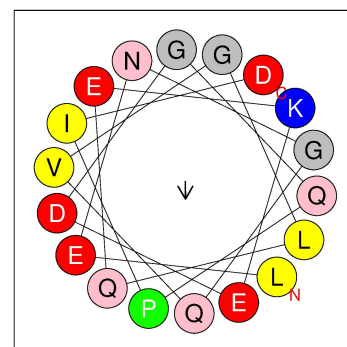[Go to screening](#)[Manual mutation](#)[GA mutation](#)522 **ENGQVGLQEKEKGQPIDQ** 539**Physico-chemical properties****Hydrophobicity  $\langle H \rangle$** 

-0.027

**Hydrophobic moment  $\langle\mu_H\rangle$** 

0.092

**Net charge  $z$** 

-4

**Polar residues + GLY****Polar residues + GLY (n / %)**

14 / 77.78

**Uncharged residues + GLY**

GLN 4, ASN 1, GLY 3

**Charged residues**

LYS 1, GLU 3, ASP 2,

**Hydrophobic face : none****Nonpolar residues****Nonpolar residues (n / %)**

4 / 22.22

**Aromatic residues****Special residues**

CYS 0, PRO 1

[Click to enlarge](#)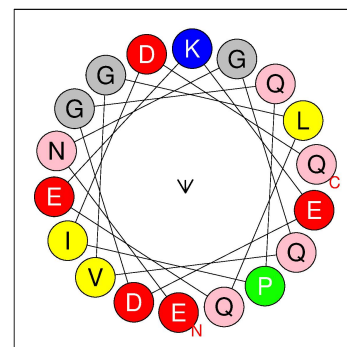[Go to screening](#)[Manual mutation](#)[GA mutation](#)523 **NGQVGLQEKEKGQPIDQQ** 540**Physico-chemical properties****Hydrophobicity  $\langle H \rangle$** 

-0.004

**Polar residues + GLY****Polar residues + GLY (n / %)**

14 / 77.78

**Nonpolar residues****Nonpolar residues (n / %)**

4 / 22.22

[Click to enlarge](#)



Hydrophobic moment  $\langle \mu_H \rangle$   
0.116  
Net charge  $z$   
-3

Uncharged residues + GLY  
GLN 5, ASN 1, GLY 3  
Charged residues  
LYS 1, GLU 2, ASP 2,  
Hydrophobic face : none

Aromatic residues  
Special residues  
CYS 0, PRO 1

[Go to screening](#)

[Manual mutation](#)

[GA mutation](#)

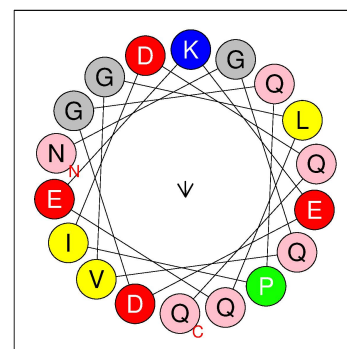

524 GQVGLQEKEDGQPIDQQP 541

Physico-chemical properties  
Hydrophobicity  $\langle H \rangle$   
0.069  
Hydrophobic moment  $\langle \mu_H \rangle$   
0.123  
Net charge  $z$   
-3

Polar residues + GLY  
Polar residues + GLY (n / %)  
13 / 72.22  
Uncharged residues + GLY  
GLN 5, GLY 3  
Charged residues  
LYS 1, GLU 2, ASP 2,  
Hydrophobic face : none

Nonpolar residues  
Nonpolar residues (n / %)  
5 / 27.78  
Aromatic residues  
Special residues  
CYS 0, PRO 2

[Go to screening](#)

[Manual mutation](#)

[GA mutation](#)

[Click to enlarge](#)

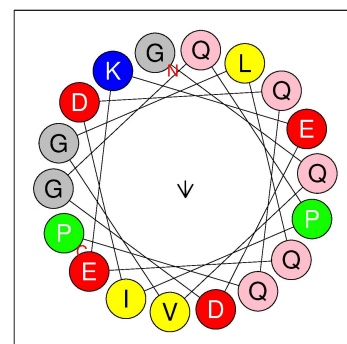

525 QVGLQEKEDGQPIDQQPI 542

Physico-chemical properties  
Hydrophobicity  $\langle H \rangle$   
0.169  
Hydrophobic moment  $\langle \mu_H \rangle$   
0.034  
Net charge  $z$   
-3

Polar residues + GLY  
Polar residues + GLY (n / %)  
12 / 66.67  
Uncharged residues + GLY  
GLN 5, GLY 2  
Charged residues  
LYS 1, GLU 2, ASP 2,  
Hydrophobic face : none

Nonpolar residues  
Nonpolar residues (n / %)  
6 / 33.33  
Aromatic residues  
Special residues  
CYS 0, PRO 2

[Go to screening](#)

[Manual mutation](#)

[GA mutation](#)

[Click to enlarge](#)

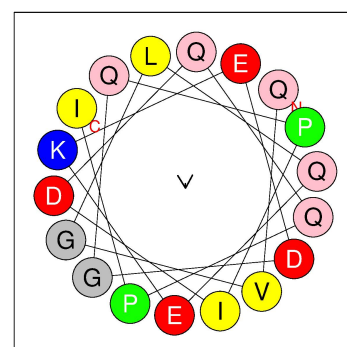

526 VGLQEKEDGQPIDQQPID 543

Physico-chemical properties  
Hydrophobicity  $\langle H \rangle$   
0.139  
Hydrophobic moment  $\langle \mu_H \rangle$   
0.060  
Net charge  $z$   
-4

Polar residues + GLY  
Polar residues + GLY (n / %)  
12 / 66.67  
Uncharged residues + GLY  
GLN 4, GLY 2  
Charged residues  
LYS 1, GLU 2, ASP 3,  
Hydrophobic face : none

Nonpolar residues  
Nonpolar residues (n / %)  
6 / 33.33  
Aromatic residues  
Special residues  
CYS 0, PRO 2

[Go to screening](#)

[Manual mutation](#)

[GA mutation](#)

[Click to enlarge](#)

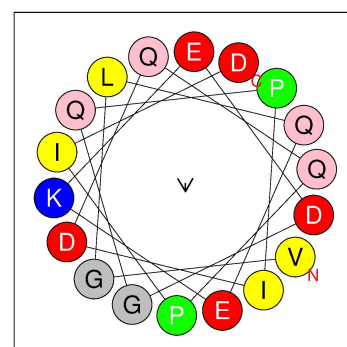

527 GLQEKEDGQPIDQQPIDK 544

Physico-chemical properties  
Hydrophobicity  $\langle H \rangle$   
0.016

Polar residues + GLY  
Polar residues + GLY (n / %)  
13 / 72.22

Nonpolar residues  
Nonpolar residues (n / %)  
5 / 27.78

[Click to enlarge](#)

**Hydrophobic moment <math>\langle \mu\_H \rangle</math>**

0.102

**Net charge  $z$** 

-3

**Uncharged residues + GLY**

GLN 4, GLY 2

**Charged residues**

LYS 2, GLU 2, ASP 3,

**Hydrophobic face : none****Aromatic residues****Special residues**

CYS 0, PRO 2

[Go to screening](#)[Manual mutation](#)[GA mutation](#)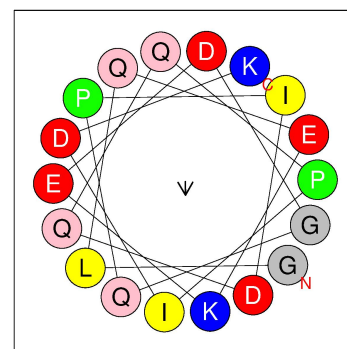

528LQEKEDGQPIDQQPIDKE545

**Physico-chemical properties****Hydrophobicity <math>\langle H \rangle</math>**

-0.019

**Hydrophobic moment <math>\langle \mu\_H \rangle</math>**

0.085

**Net charge  $z$** 

-4

**Polar residues + GLY****Polar residues + GLY (n / %)**

13 / 72.22

**Uncharged residues + GLY**

GLN 4, GLY 1

**Charged residues**

LYS 2, GLU 3, ASP 3,

**Hydrophobic face : none****Nonpolar residues****Nonpolar residues (n / %)**

5 / 27.78

**Aromatic residues****Special residues**

CYS 0, PRO 2

[Click to enlarge](#)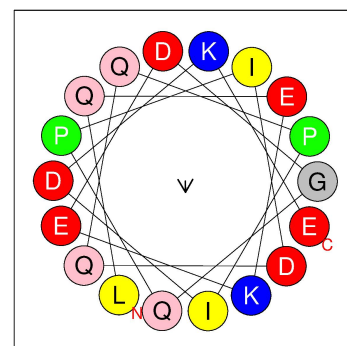[Go to screening](#)[Manual mutation](#)[GA mutation](#)

529QEKEGDPIDQQPIDKEI546

**Physico-chemical properties****Hydrophobicity <math>\langle H \rangle</math>**

-0.014

**Hydrophobic moment <math>\langle \mu\_H \rangle</math>**

0.089

**Net charge  $z$** 

-4

**Polar residues + GLY****Polar residues + GLY (n / %)**

13 / 72.22

**Uncharged residues + GLY**

GLN 4, GLY 1

**Charged residues**

LYS 2, GLU 3, ASP 3,

**Hydrophobic face : none****Nonpolar residues****Nonpolar residues (n / %)**

5 / 27.78

**Aromatic residues****Special residues**

CYS 0, PRO 2

[Click to enlarge](#)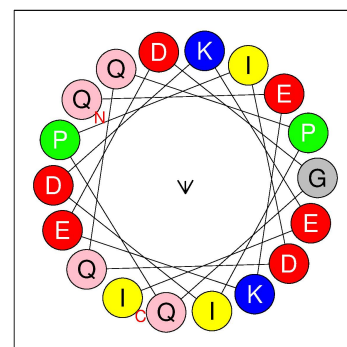[Go to screening](#)[Manual mutation](#)[GA mutation](#)

530EKEDGQPIDQQPIDKEIE547

**Physico-chemical properties****Hydrophobicity <math>\langle H \rangle</math>**

-0.037

**Hydrophobic moment <math>\langle \mu\_H \rangle</math>**

0.105

**Net charge  $z$** 

-5

**Polar residues + GLY****Polar residues + GLY (n / %)**

13 / 72.22

**Uncharged residues + GLY**

GLN 3, GLY 1

**Charged residues**

LYS 2, GLU 4, ASP 3,

**Hydrophobic face : none****Nonpolar residues****Nonpolar residues (n / %)**

5 / 27.78

**Aromatic residues****Special residues**

CYS 0, PRO 2

[Click to enlarge](#)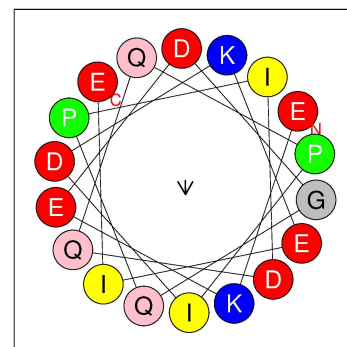[Go to screening](#)[Manual mutation](#)[GA mutation](#)

531KEDGQPIDQQPIDKEIEP548

**Physico-chemical properties****Hydrophobicity <math>\langle H \rangle</math>**

0.038

**Polar residues + GLY****Polar residues + GLY (n / %)**

12 / 66.67

**Nonpolar residues****Nonpolar residues (n / %)**

6 / 33.33

[Click to enlarge](#)

**Hydrophobic moment <math>\langle \mu\_H \rangle</math>**

0.092

**Net charge  $z$** 

-4

**Uncharged residues + GLY**

GLN 3, GLY 1

**Charged residues**

LYS 2, GLU 3, ASP 3,

**Hydrophobic face : none****Aromatic residues****Special residues**

CYS 0, PRO 3

[Go to screening](#)[Manual mutation](#)[GA mutation](#)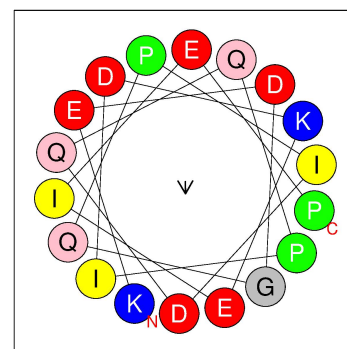532**EDGQPIDQQPIDKEIEPD**549**Physico-chemical properties****Hydrophobicity <math>\langle H \rangle</math>**

0.051

**Hydrophobic moment <math>\langle \mu\_H \rangle</math>**

0.103

**Net charge  $z$** 

-6

**Polar residues + GLY****Polar residues + GLY (n / %)**

12 / 66.67

**Uncharged residues + GLY**

GLN 3, GLY 1

**Charged residues**

LYS 1, GLU 3, ASP 4,

**Hydrophobic face : none****Nonpolar residues****Nonpolar residues (n / %)**

6 / 33.33

**Aromatic residues****Special residues**

CYS 0, PRO 3

[Click to enlarge](#)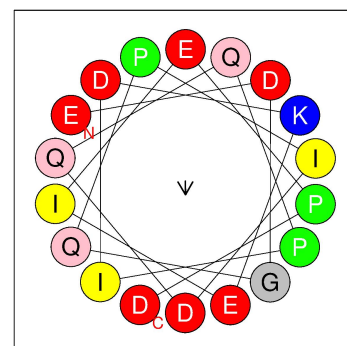[Go to screening](#)[Manual mutation](#)[GA mutation](#)533**DGQPIDQQPIDKEIEPDG**550**Physico-chemical properties****Hydrophobicity <math>\langle H \rangle</math>**

0.086

**Hydrophobic moment <math>\langle \mu\_H \rangle</math>**

0.091

**Net charge  $z$** 

-5

**Polar residues + GLY****Polar residues + GLY (n / %)**

12 / 66.67

**Uncharged residues + GLY**

GLN 3, GLY 2

**Charged residues**

LYS 1, GLU 2, ASP 4,

**Hydrophobic face : none****Nonpolar residues****Nonpolar residues (n / %)**

6 / 33.33

**Aromatic residues****Special residues**

CYS 0, PRO 3

[Click to enlarge](#)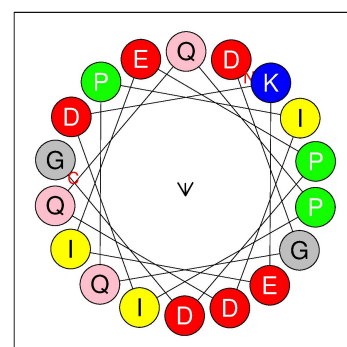[Go to screening](#)[Manual mutation](#)[GA mutation](#)534**GQPIDQQPIDKEIEPDGA**551**Physico-chemical properties****Hydrophobicity <math>\langle H \rangle</math>**

0.146

**Hydrophobic moment <math>\langle \mu\_H \rangle</math>**

0.040

**Net charge  $z$** 

-4

**Polar residues + GLY****Polar residues + GLY (n / %)**

11 / 61.11

**Uncharged residues + GLY**

GLN 3, GLY 2

**Charged residues**

LYS 1, GLU 2, ASP 3,

**Hydrophobic face : none****Nonpolar residues****Nonpolar residues (n / %)**

7 / 38.89

**Aromatic residues****Special residues**

CYS 0, PRO 3

[Click to enlarge](#)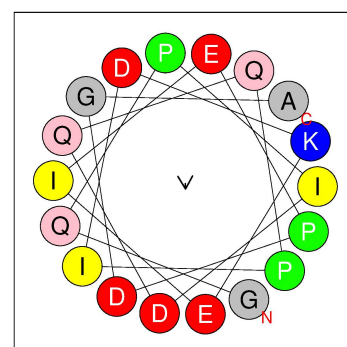[Go to screening](#)[Manual mutation](#)[GA mutation](#)535**QPIDQQPIDKEIEPDGAE**552**Physico-chemical properties****Hydrophobicity <math>\langle H \rangle</math>**

0.111

**Polar residues + GLY****Polar residues + GLY (n / %)**

11 / 61.11

**Nonpolar residues****Nonpolar residues (n / %)**

7 / 38.89

[Click to enlarge](#)

**Hydrophobic moment <math>\langle \mu\_H \rangle</math>**

0.019

**Net charge  $z$** 

-5

**Uncharged residues + GLY**

GLN 3, GLY 1

**Charged residues**

LYS 1, GLU 3, ASP 3,

**Hydrophobic face : none****Aromatic residues****Special residues**

CYS 0, PRO 3

[Go to screening](#)[Manual mutation](#)[GA mutation](#)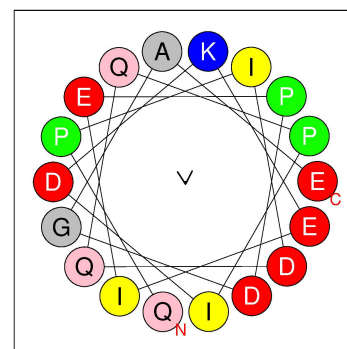536**PIDQQPIDKEIEPDGAEL**553**Physico-chemical properties****Hydrophobicity <math>\langle H \rangle</math>**

0.217

**Hydrophobic moment <math>\langle \mu\_H \rangle</math>**

0.126

**Net charge  $z$** 

-5

**Polar residues + GLY****Polar residues + GLY (n / %)**

10 / 55.56

**Uncharged residues + GLY**

GLN 2, GLY 1

**Charged residues**

LYS 1, GLU 3, ASP 3,

**Hydrophobic face : none****Nonpolar residues****Nonpolar residues (n / %)**

8 / 44.44

**Aromatic residues****Special residues**

CYS 0, PRO 3

[Click to enlarge](#)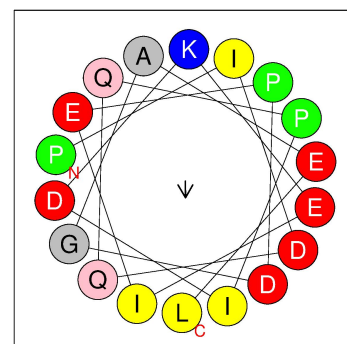[Go to screening](#)[Manual mutation](#)[GA mutation](#)537**IDQQPIDKEIEPDGAEL**554**Physico-chemical properties****Hydrophobicity <math>\langle H \rangle</math>**

0.142

**Hydrophobic moment <math>\langle \mu\_H \rangle</math>**

0.159

**Net charge  $z$** 

-6

**Polar residues + GLY****Polar residues + GLY (n / %)**

11 / 61.11

**Uncharged residues + GLY**

GLN 2, GLY 1

**Charged residues**

LYS 1, GLU 4, ASP 3,

**Hydrophobic face : none****Nonpolar residues****Nonpolar residues (n / %)**

7 / 38.89

**Aromatic residues****Special residues**

CYS 0, PRO 2

[Click to enlarge](#)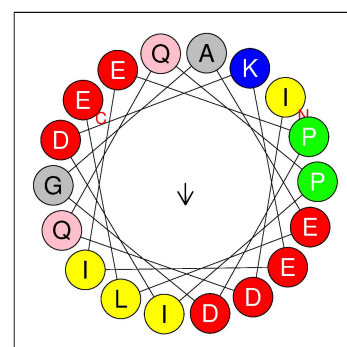[Go to screening](#)[Manual mutation](#)[GA mutation](#)538**DQQPIDKEIEPDGAEL**555**Physico-chemical properties****Hydrophobicity <math>\langle H \rangle</math>**

0.042

**Hydrophobic moment <math>\langle \mu\_H \rangle</math>**

0.237

**Net charge  $z$** 

-6

**Polar residues + GLY****Polar residues + GLY (n / %)**

12 / 66.67

**Uncharged residues + GLY**

GLN 2, GLY 2

**Charged residues**

LYS 1, GLU 4, ASP 3,

**Hydrophobic face : none****Nonpolar residues****Nonpolar residues (n / %)**

6 / 33.33

**Aromatic residues****Special residues**

CYS 0, PRO 2

[Click to enlarge](#)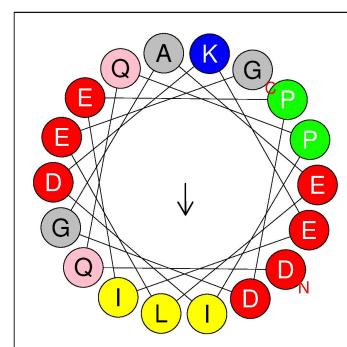[Go to screening](#)[Manual mutation](#)[GA mutation](#)539**QQPIDKEIEPDGAEL**556**Physico-chemical properties****Hydrophobicity <math>\langle H \rangle</math>**

0.124

**Polar residues + GLY****Polar residues + GLY (n / %)**

11 / 61.11

**Nonpolar residues****Nonpolar residues (n / %)**

7 / 38.89

[Click to enlarge](#)

**Hydrophobic moment <math>\langle \mu\_H \rangle</math>**

0.298

**Net charge  $z$** 

-5

**Uncharged residues + GLY**

GLN 2, GLY 2

**Charged residues**

LYS 1, GLU 4, ASP 2,

**Hydrophobic face : none****Aromatic residues****Special residues**

CYS 0, PRO 3

[Go to screening](#)[Manual mutation](#)[GA mutation](#)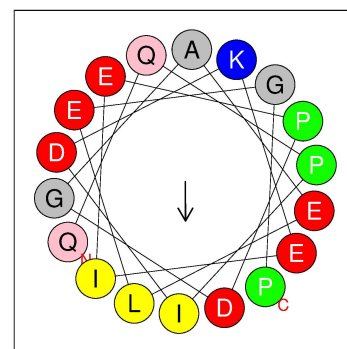

540 QPIDKEIEPDGAELEGPE 557

**Physico-chemical properties****Hydrophobicity <math>\langle H \rangle</math>**

0.101

**Hydrophobic moment <math>\langle \mu\_H \rangle</math>**

0.288

**Net charge  $z$** 

-6

**Polar residues + GLY****Polar residues + GLY (n / %)**

11 / 61.11

**Uncharged residues + GLY**

GLN 1, GLY 2

**Charged residues**

LYS 1, GLU 5, ASP 2,

**Hydrophobic face : none****Nonpolar residues****Nonpolar residues (n / %)**

7 / 38.89

**Aromatic residues****Special residues**

CYS 0, PRO 3

[Go to screening](#)[Manual mutation](#)[GA mutation](#)[Click to enlarge](#)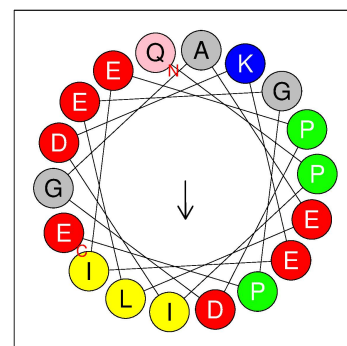

541 PIDKEIEPDGAELEGPEE 558

**Physico-chemical properties****Hydrophobicity <math>\langle H \rangle</math>**

0.078

**Hydrophobic moment <math>\langle \mu\_H \rangle</math>**

0.310

**Net charge  $z$** 

-7

**Polar residues + GLY****Polar residues + GLY (n / %)**

11 / 61.11

**Uncharged residues + GLY**

GLY 2

**Charged residues**

LYS 1, GLU 6, ASP 2,

**Hydrophobic face : none****Nonpolar residues****Nonpolar residues (n / %)**

7 / 38.89

**Aromatic residues****Special residues**

CYS 0, PRO 3

[Go to screening](#)[Manual mutation](#)[GA mutation](#)[Click to enlarge](#)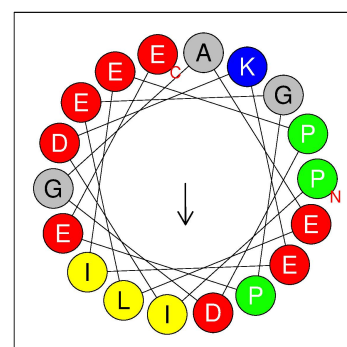

542 IDKEIEPDGAELEGPEEK 559

**Physico-chemical properties****Hydrophobicity <math>\langle H \rangle</math>**

-0.017

**Hydrophobic moment <math>\langle \mu\_H \rangle</math>**

0.328

**Net charge  $z$** 

-6

**Polar residues + GLY****Polar residues + GLY (n / %)**

12 / 66.67

**Uncharged residues + GLY**

GLY 2

**Charged residues**

LYS 2, GLU 6, ASP 2,

**Hydrophobic face : none****Nonpolar residues****Nonpolar residues (n / %)**

6 / 33.33

**Aromatic residues****Special residues**

CYS 0, PRO 2

[Go to screening](#)[Manual mutation](#)[GA mutation](#)[Click to enlarge](#)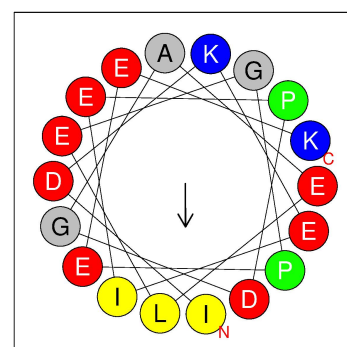

543 DKEIEPDGAELEGPEEKR 560

**Physico-chemical properties****Hydrophobicity <math>\langle H \rangle</math>**

-0.173

**Polar residues + GLY****Polar residues + GLY (n / %)**

13 / 72.22

**Nonpolar residues****Nonpolar residues (n / %)**

5 / 27.78

[Click to enlarge](#)



**Hydrophobic moment <math>\langle \mu\_H \rangle</math>**

0.175

**Net charge  $z$** 

-5

**Uncharged residues + GLY**

GLY 2

**Charged residues**

LYS 2, ARG 1, GLU 6, ASP 2,

**Hydrophobic face : none****Aromatic residues****Special residues**

CYS 0, PRO 2

[Go to screening](#)[Manual mutation](#)[GA mutation](#)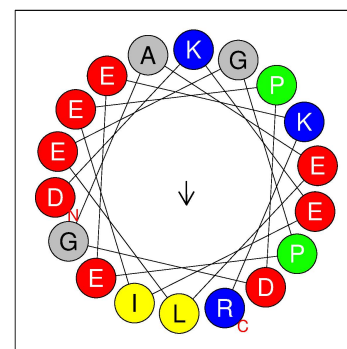544**KEIEPDGAELEGPEEKRE**561**Physico-chemical properties****Hydrophobicity <math>\langle H \rangle</math>**

-0.166

**Hydrophobic moment <math>\langle \mu\_H \rangle</math>**

0.176

**Net charge  $z$** 

-5

**Polar residues + GLY****Polar residues + GLY (n / %)**

13 / 72.22

**Uncharged residues + GLY**

GLY 2

**Charged residues**

LYS 2, ARG 1, GLU 7, ASP 1,

**Hydrophobic face : none****Nonpolar residues****Nonpolar residues (n / %)**

5 / 27.78

**Aromatic residues****Special residues**

CYS 0, PRO 2

[Click to enlarge](#)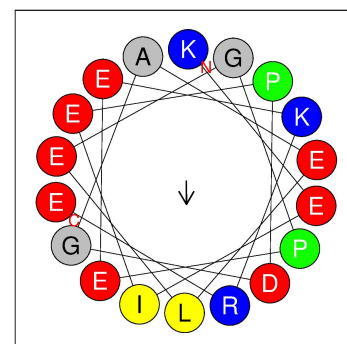[Go to screening](#)[Manual mutation](#)[GA mutation](#)545**EIEPDGAELEGPEEKREG**562**Physico-chemical properties****Hydrophobicity <math>\langle H \rangle</math>**

-0.111

**Hydrophobic moment <math>\langle \mu\_H \rangle</math>**

0.121

**Net charge  $z$** 

-6

**Polar residues + GLY****Polar residues + GLY (n / %)**

13 / 72.22

**Uncharged residues + GLY**

GLY 3

**Charged residues**

LYS 1, ARG 1, GLU 7, ASP 1,

**Hydrophobic face : none****Nonpolar residues****Nonpolar residues (n / %)**

5 / 27.78

**Aromatic residues****Special residues**

CYS 0, PRO 2

[Click to enlarge](#)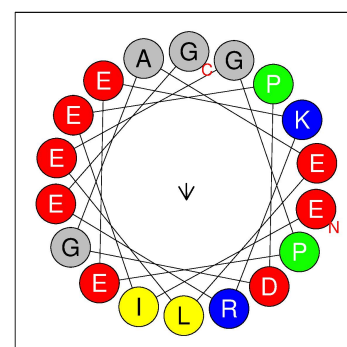[Go to screening](#)[Manual mutation](#)[GA mutation](#)546**IEPDGAELEGPEEKREGE**563**Physico-chemical properties****Hydrophobicity <math>\langle H \rangle</math>**

-0.111

**Hydrophobic moment <math>\langle \mu\_H \rangle</math>**

0.121

**Net charge  $z$** 

-6

**Polar residues + GLY****Polar residues + GLY (n / %)**

13 / 72.22

**Uncharged residues + GLY**

GLY 3

**Charged residues**

LYS 1, ARG 1, GLU 7, ASP 1,

**Hydrophobic face : none****Nonpolar residues****Nonpolar residues (n / %)**

5 / 27.78

**Aromatic residues****Special residues**

CYS 0, PRO 2

[Click to enlarge](#)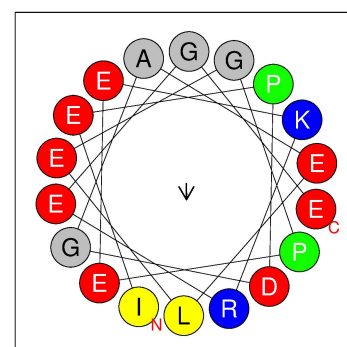[Go to screening](#)[Manual mutation](#)[GA mutation](#)547**EPDGAELEGPEEKREGE**564**Physico-chemical properties****Hydrophobicity <math>\langle H \rangle</math>**

-0.247

**Polar residues + GLY****Polar residues + GLY (n / %)**

14 / 77.78

**Nonpolar residues****Nonpolar residues (n / %)**

4 / 22.22

[Click to enlarge](#)

**Hydrophobic moment <math>\langle \mu\_H \rangle</math>**

0.049

**Net charge  $z$** 

-7

**Uncharged residues + GLY**

GLY 3

**Charged residues**

LYS 1, ARG 1, GLU 8, ASP 1,

**Hydrophobic face : none****Aromatic residues****Special residues**

CYS 0, PRO 2

[Go to screening](#)[Manual mutation](#)[GA mutation](#)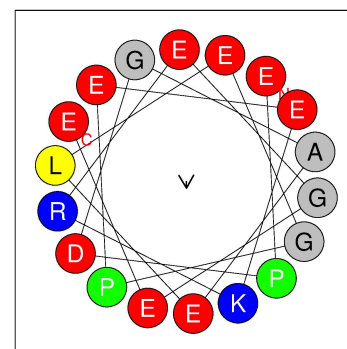

548PDGAELEGPEEKREGEER565

**Physico-chemical properties****Hydrophobicity <math>\langle H \rangle</math>**

-0.267

**Hydrophobic moment <math>\langle \mu\_H \rangle</math>**

0.067

**Net charge  $z$** 

-5

**Polar residues + GLY****Polar residues + GLY (n / %)**

14 / 77.78

**Uncharged residues + GLY**

GLY 3

**Charged residues**

LYS 1, ARG 2, GLU 7, ASP 1,

**Hydrophobic face : none****Nonpolar residues****Nonpolar residues (n / %)**

4 / 22.22

**Aromatic residues****Special residues**

CYS 0, PRO 2

[Go to screening](#)[Manual mutation](#)[GA mutation](#)[Click to enlarge](#)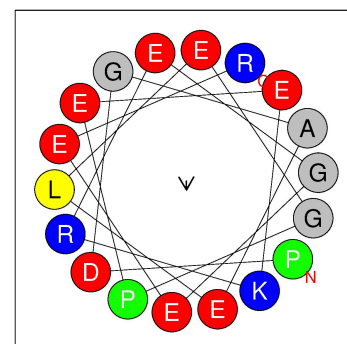

549DGAELEGPEEKREGEERD566

**Physico-chemical properties****Hydrophobicity <math>\langle H \rangle</math>**

-0.350

**Hydrophobic moment <math>\langle \mu\_H \rangle</math>**

0.069

**Net charge  $z$** 

-6

**Polar residues + GLY****Polar residues + GLY (n / %)**

15 / 83.33

**Uncharged residues + GLY**

GLY 3

**Charged residues**

LYS 1, ARG 2, GLU 7, ASP 2,

**Hydrophobic face : none****Nonpolar residues****Nonpolar residues (n / %)**

3 / 16.67

**Aromatic residues****Special residues**

CYS 0, PRO 1

[Go to screening](#)[Manual mutation](#)[GA mutation](#)[Click to enlarge](#)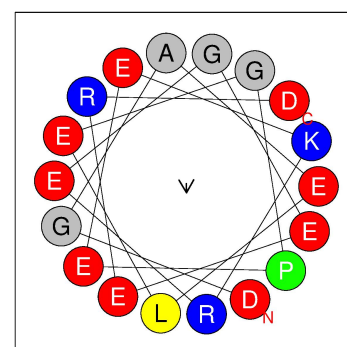

550GAELEGPEEKREGEERDE567

**Physico-chemical properties****Hydrophobicity <math>\langle H \rangle</math>**

-0.343

**Hydrophobic moment <math>\langle \mu\_H \rangle</math>**

0.075

**Net charge  $z$** 

-6

**Polar residues + GLY****Polar residues + GLY (n / %)**

15 / 83.33

**Uncharged residues + GLY**

GLY 3

**Charged residues**

LYS 1, ARG 2, GLU 8, ASP 1,

**Hydrophobic face : none****Nonpolar residues****Nonpolar residues (n / %)**

3 / 16.67

**Aromatic residues****Special residues**

CYS 0, PRO 1

[Go to screening](#)[Manual mutation](#)[GA mutation](#)[Click to enlarge](#)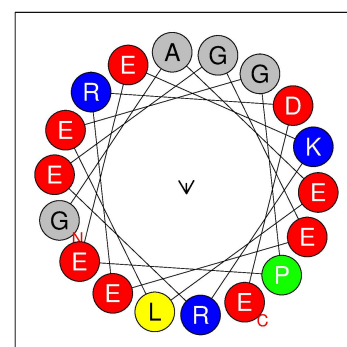

551AELEGPEEKREGEERDEE568

**Physico-chemical properties****Hydrophobicity <math>\langle H \rangle</math>**

-0.378

**Polar residues + GLY****Polar residues + GLY (n / %)**

15 / 83.33

**Nonpolar residues****Nonpolar residues (n / %)**

3 / 16.67

[Click to enlarge](#)





**Hydrophobic moment <math>\langle \mu\_H \rangle</math>**

0.095

**Net charge  $z$** 

-3

**Uncharged residues + GLY**

SER 1, GLY 2

**Charged residues**

LYS 1, ARG 4, GLU 7, ASP 1,

**Hydrophobic face : none****Aromatic residues****Special residues**

CYS 0, PRO 2

[Go to screening](#)[Manual mutation](#)[GA mutation](#)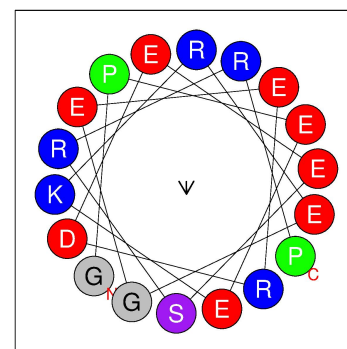556**PEEKREGEERDEESRRPC**573**Physico-chemical properties****Hydrophobicity <math>\langle H \rangle</math>**

-0.408

**Hydrophobic moment <math>\langle \mu\_H \rangle</math>**

0.167

**Net charge  $z$** 

-3

**Polar residues + GLY****Polar residues + GLY (n / %)**

15 / 83.33

**Uncharged residues + GLY**

SER 1, GLY 1

**Charged residues**

LYS 1, ARG 4, GLU 7, ASP 1,

**Hydrophobic face : none****Nonpolar residues****Nonpolar residues (n / %)**

3 / 16.67

**Aromatic residues****Special residues**

CYS 1, PRO 2

[Click to enlarge](#)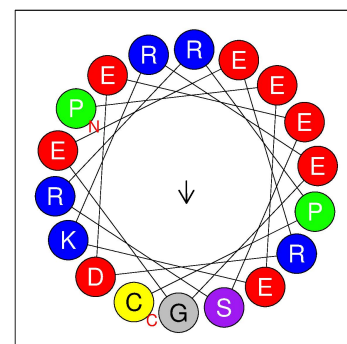[Go to screening](#)[Manual mutation](#)[GA mutation](#)557**EEKREGEERDEESRRPCA**574**Physico-chemical properties****Hydrophobicity <math>\langle H \rangle</math>**

-0.431

**Hydrophobic moment <math>\langle \mu\_H \rangle</math>**

0.181

**Net charge  $z$** 

-3

**Polar residues + GLY****Polar residues + GLY (n / %)**

15 / 83.33

**Uncharged residues + GLY**

SER 1, GLY 1

**Charged residues**

LYS 1, ARG 4, GLU 7, ASP 1,

**Hydrophobic face : none****Nonpolar residues****Nonpolar residues (n / %)**

3 / 16.67

**Aromatic residues****Special residues**

CYS 1, PRO 1

[Click to enlarge](#)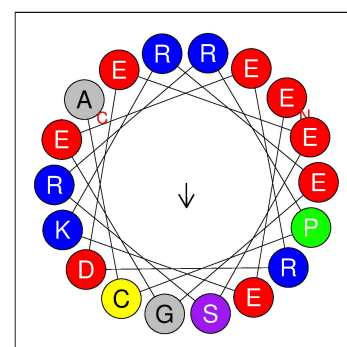[Go to screening](#)[Manual mutation](#)[GA mutation](#)558**EKREGEERDEESRRPCAM**575**Physico-chemical properties****Hydrophobicity <math>\langle H \rangle</math>**

-0.327

**Hydrophobic moment <math>\langle \mu\_H \rangle</math>**

0.138

**Net charge  $z$** 

-2

**Polar residues + GLY****Polar residues + GLY (n / %)**

14 / 77.78

**Uncharged residues + GLY**

SER 1, GLY 1

**Charged residues**

LYS 1, ARG 4, GLU 6, ASP 1,

**Hydrophobic face : none****Nonpolar residues****Nonpolar residues (n / %)**

4 / 22.22

**Aromatic residues****Special residues**

CYS 1, PRO 1

[Click to enlarge](#)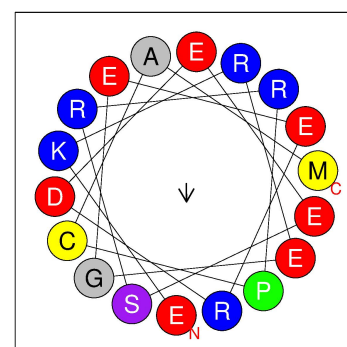[Go to screening](#)[Manual mutation](#)[GA mutation](#)559**KREGEERDEESRRPCAMV**576**Physico-chemical properties****Hydrophobicity <math>\langle H \rangle</math>**

-0.223

**Polar residues + GLY****Polar residues + GLY (n / %)**

13 / 72.22

**Nonpolar residues****Nonpolar residues (n / %)**

5 / 27.78

[Click to enlarge](#)

**Hydrophobic moment  $\langle \mu_H \rangle$** 

0.241

**Net charge  $z$** 

-1

**Uncharged residues + GLY**

SER 1, GLY 1

**Charged residues**

LYS 1, ARG 4, GLU 5, ASP 1,

**Hydrophobic face : none****Aromatic residues****Special residues**

CYS 1, PRO 1

[Go to screening](#)[Manual mutation](#)[GA mutation](#)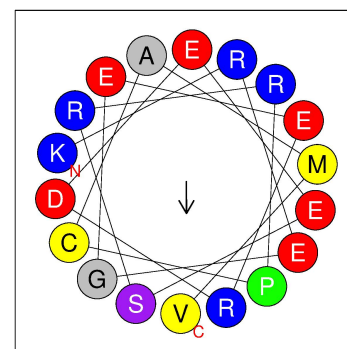560**REG**EERDEESRRPCAMVT**577****Physico-chemical properties****Hydrophobicity  $\langle H \rangle$** 

-0.154

**Hydrophobic moment  $\langle \mu_H \rangle$** 

0.236

**Net charge  $z$** 

-2

**Polar residues + GLY****Polar residues + GLY (n / %)**

13 / 72.22

**Uncharged residues + GLY**

SER 1, THR 1, GLY 1

**Charged residues**

ARG 4, GLU 5, ASP 1,

**Hydrophobic face : none****Nonpolar residues****Nonpolar residues (n / %)**

5 / 27.78

**Aromatic residues****Special residues**

CYS 1, PRO 1

[Go to screening](#)[Manual mutation](#)[GA mutation](#)[Click to enlarge](#)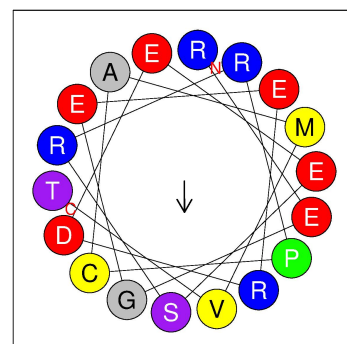561**E**GEERDEESRRPCAMVTP**578****Physico-chemical properties****Hydrophobicity  $\langle H \rangle$** 

-0.058

**Hydrophobic moment  $\langle \mu_H \rangle$** 

0.141

**Net charge  $z$** 

-3

**Polar residues + GLY****Polar residues + GLY (n / %)**

12 / 66.67

**Uncharged residues + GLY**

SER 1, THR 1, GLY 1

**Charged residues**

ARG 3, GLU 5, ASP 1,

**Hydrophobic face : none****Nonpolar residues****Nonpolar residues (n / %)**

6 / 33.33

**Aromatic residues****Special residues**

CYS 1, PRO 2

[Go to screening](#)[Manual mutation](#)[GA mutation](#)[Click to enlarge](#)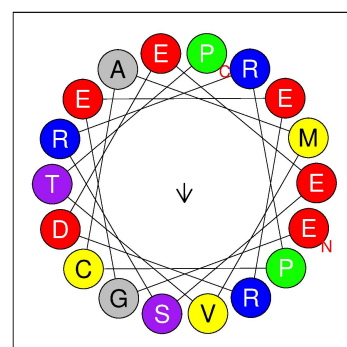562**G**EERDEESRRPCAMVTPG**579****Physico-chemical properties****Hydrophobicity  $\langle H \rangle$** 

-0.022

**Hydrophobic moment  $\langle \mu_H \rangle$** 

0.156

**Net charge  $z$** 

-2

**Polar residues + GLY****Polar residues + GLY (n / %)**

12 / 66.67

**Uncharged residues + GLY**

SER 1, THR 1, GLY 2

**Charged residues**

ARG 3, GLU 4, ASP 1,

**Hydrophobic face : none****Nonpolar residues****Nonpolar residues (n / %)**

6 / 33.33

**Aromatic residues****Special residues**

CYS 1, PRO 2

[Go to screening](#)[Manual mutation](#)[GA mutation](#)[Click to enlarge](#)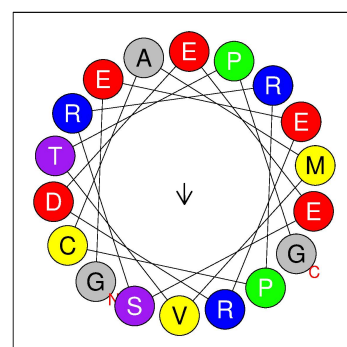563**E**ERDEESRRPCAMVTPGA**580****Physico-chemical properties****Hydrophobicity  $\langle H \rangle$** 

-0.005

**Polar residues + GLY****Polar residues + GLY (n / %)**

11 / 61.11

**Nonpolar residues****Nonpolar residues (n / %)**

7 / 38.89

[Click to enlarge](#)

**Hydrophobic moment  $\langle\mu_H\rangle$** 

0.170

**Net charge  $z$** 

-2

**Uncharged residues + GLY**

SER 1, THR 1, GLY 1

**Charged residues**

ARG 3, GLU 4, ASP 1,

**Hydrophobic face : none****Aromatic residues****Special residues**

CYS 1, PRO 2

[Go to screening](#)[Manual mutation](#)[GA mutation](#)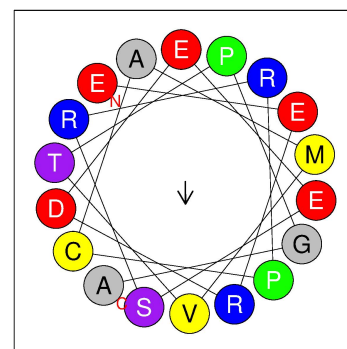[Click to enlarge](#)**Physico-chemical properties****Hydrophobicity  $\langle H \rangle$** 

-0.005

**Hydrophobic moment  $\langle\mu_H\rangle$** 

0.170

**Net charge  $z$** 

-2

**Polar residues + GLY****Polar residues + GLY (n / %)**

11 / 61.11

**Uncharged residues + GLY**

SER 1, THR 1, GLY 1

**Charged residues**

ARG 3, GLU 4, ASP 1,

**Hydrophobic face : none****Nonpolar residues****Nonpolar residues (n / %)**

7 / 38.89

**Aromatic residues****Special residues**

CYS 1, PRO 2

[Go to screening](#)[Manual mutation](#)[GA mutation](#)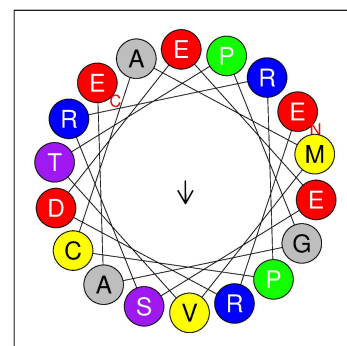[Click to enlarge](#)565 **RDEESRRPCAMVTPGAEE** 582**Physico-chemical properties****Hydrophobicity  $\langle H \rangle$** 

-0.005

**Hydrophobic moment  $\langle\mu_H\rangle$** 

0.170

**Net charge  $z$** 

-2

**Polar residues + GLY****Polar residues + GLY (n / %)**

11 / 61.11

**Uncharged residues + GLY**

SER 1, THR 1, GLY 1

**Charged residues**

ARG 3, GLU 4, ASP 1,

**Hydrophobic face : none****Nonpolar residues****Nonpolar residues (n / %)**

7 / 38.89

**Aromatic residues****Special residues**

CYS 1, PRO 2

[Go to screening](#)[Manual mutation](#)[GA mutation](#)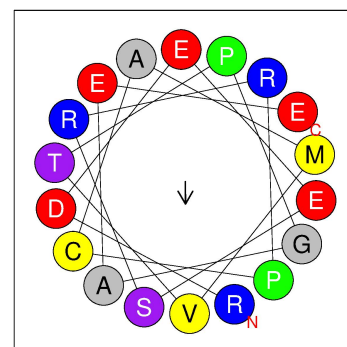[Click to enlarge](#)566 **DEESRRPCAMVTPGAEEP** 583**Physico-chemical properties****Hydrophobicity  $\langle H \rangle$** 

0.091

**Hydrophobic moment  $\langle\mu_H\rangle$** 

0.261

**Net charge  $z$** 

-3

**Polar residues + GLY****Polar residues + GLY (n / %)**

10 / 55.56

**Uncharged residues + GLY**

SER 1, THR 1, GLY 1

**Charged residues**

ARG 2, GLU 4, ASP 1,

**Hydrophobic face : none****Nonpolar residues****Nonpolar residues (n / %)**

8 / 44.44

**Aromatic residues****Special residues**

CYS 1, PRO 3

[Go to screening](#)[Manual mutation](#)[GA mutation](#)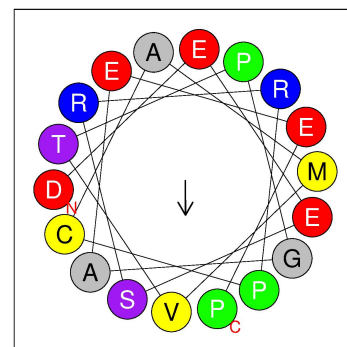[Click to enlarge](#)567 **EESRRPCAMVTPGAEEPS** 584**Physico-chemical properties****Hydrophobicity  $\langle H \rangle$** 

0.132

**Polar residues + GLY****Polar residues + GLY (n / %)**

10 / 55.56

**Nonpolar residues****Nonpolar residues (n / %)**

8 / 44.44

11 / 61.11

|                                                            |                                       |                          |
|------------------------------------------------------------|---------------------------------------|--------------------------|
| <b>Hydrophobic moment <math>\langle\mu H\rangle</math></b> | <b>Uncharged residues + GLY</b>       | <b>Aromatic residues</b> |
| 0.066                                                      | SER 1, THR 1, GLY 1                   |                          |
| <b>Net charge <math>z</math></b>                           | <b>Charged residues</b>               | <b>Special residues</b>  |
| -2                                                         | ARG 1, GLU 3,                         | CYS 1, PRO 5             |
|                                                            | <b>Hydrophobic face : M P G P P V</b> |                          |

[Go to screening](#)
[Manual mutation](#)
[GA mutation](#)
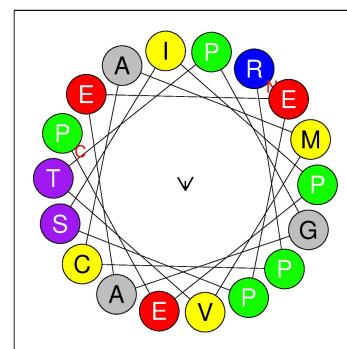
[Click to enlarge](#)

|                                                            |                                       |                                  |
|------------------------------------------------------------|---------------------------------------|----------------------------------|
| 572PCAMVTPGAEEPSIPEPP589                                   |                                       |                                  |
| <b>Physico-chemical properties</b>                         | <b>Polar residues + GLY</b>           | <b>Nonpolar residues</b>         |
| <b>Hydrophobicity <math>\langle H \rangle</math></b>       | <b>Polar residues + GLY (n / %)</b>   | <b>Nonpolar residues (n / %)</b> |
| 0.502                                                      | 6 / 33.33                             | 12 / 66.67                       |
| <b>Hydrophobic moment <math>\langle\mu H\rangle</math></b> | <b>Uncharged residues + GLY</b>       | <b>Aromatic residues</b>         |
| 0.053                                                      | SER 1, THR 1, GLY 1                   |                                  |
| <b>Net charge <math>z</math></b>                           | <b>Charged residues</b>               | <b>Special residues</b>          |
| -3                                                         | GLU 3,                                | CYS 1, PRO 6                     |
|                                                            | <b>Hydrophobic face : M P G P P V</b> |                                  |

[Go to screening](#)
[Manual mutation](#)
[GA mutation](#)
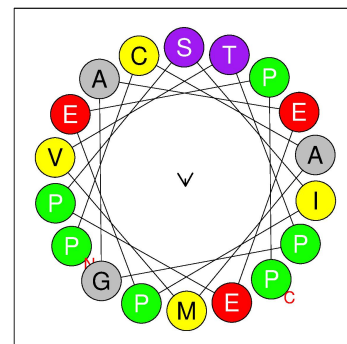
[Click to enlarge](#)

|                                                            |                                     |                                  |
|------------------------------------------------------------|-------------------------------------|----------------------------------|
| 573CAMVTPGAEEPSIPEPPK590                                   |                                     |                                  |
| <b>Physico-chemical properties</b>                         | <b>Polar residues + GLY</b>         | <b>Nonpolar residues</b>         |
| <b>Hydrophobicity <math>\langle H \rangle</math></b>       | <b>Polar residues + GLY (n / %)</b> | <b>Nonpolar residues (n / %)</b> |
| 0.407                                                      | 7 / 38.89                           | 11 / 61.11                       |
| <b>Hydrophobic moment <math>\langle\mu H\rangle</math></b> | <b>Uncharged residues + GLY</b>     | <b>Aromatic residues</b>         |
| 0.082                                                      | SER 1, THR 1, GLY 1                 |                                  |
| <b>Net charge <math>z</math></b>                           | <b>Charged residues</b>             | <b>Special residues</b>          |
| -2                                                         | LYS 1, GLU 3,                       | CYS 1, PRO 5                     |
|                                                            | <b>Hydrophobic face : none</b>      |                                  |

[Go to screening](#)
[Manual mutation](#)
[GA mutation](#)
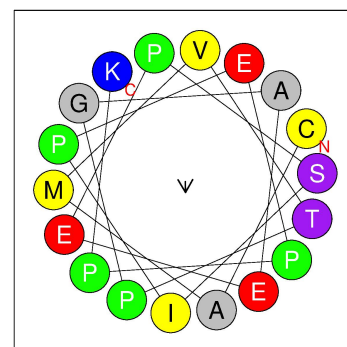
[Click to enlarge](#)

|                                                            |                                     |                                  |
|------------------------------------------------------------|-------------------------------------|----------------------------------|
| 574AMVTPGAEEPSIPEPPK591                                    |                                     |                                  |
| <b>Physico-chemical properties</b>                         | <b>Polar residues + GLY</b>         | <b>Nonpolar residues</b>         |
| <b>Hydrophobicity <math>\langle H \rangle</math></b>       | <b>Polar residues + GLY (n / %)</b> | <b>Nonpolar residues (n / %)</b> |
| 0.361                                                      | 7 / 38.89                           | 11 / 61.11                       |
| <b>Hydrophobic moment <math>\langle\mu H\rangle</math></b> | <b>Uncharged residues + GLY</b>     | <b>Aromatic residues</b>         |
| 0.109                                                      | SER 1, THR 1, GLY 1                 |                                  |
| <b>Net charge <math>z</math></b>                           | <b>Charged residues</b>             | <b>Special residues</b>          |
| -2                                                         | LYS 1, GLU 3,                       | CYS 0, PRO 6                     |
|                                                            | <b>Hydrophobic face : none</b>      |                                  |

[Go to screening](#)
[Manual mutation](#)
[GA mutation](#)
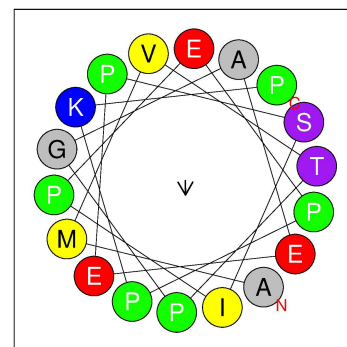
[Click to enlarge](#)

|                                                      |                                     |                                  |
|------------------------------------------------------|-------------------------------------|----------------------------------|
| 575MVTPGAEEPSIPEPPKPA592                             |                                     |                                  |
| <b>Physico-chemical properties</b>                   | <b>Polar residues + GLY</b>         | <b>Nonpolar residues</b>         |
| <b>Hydrophobicity <math>\langle H \rangle</math></b> | <b>Polar residues + GLY (n / %)</b> | <b>Nonpolar residues (n / %)</b> |
| 0.361                                                | 7 / 38.89                           | 11 / 61.11                       |



**Hydrophobic moment <math>\langle \mu\_H \rangle</math>**

0.109

**Net charge  $z$** 

-2

**Uncharged residues + GLY**

SER 1, THR 1, GLY 1

**Charged residues**

LYS 1, GLU 3,

**Hydrophobic face : none****Aromatic residues****Special residues**

CYS 0, PRO 6

[Go to screening](#)[Manual mutation](#)[GA mutation](#)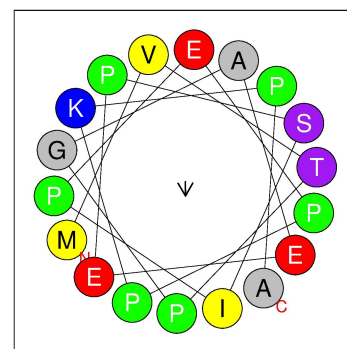

576 VTPGAEEPSIPEPPKPA A593

**Physico-chemical properties****Hydrophobicity <math>\langle H \rangle</math>**

0.310

**Hydrophobic moment <math>\langle \mu\_H \rangle</math>**

0.097

**Net charge  $z$** 

-2

**Polar residues + GLY****Polar residues + GLY (n / %)**

7 / 38.89

**Uncharged residues + GLY**

SER 1, THR 1, GLY 1

**Charged residues**

LYS 1, GLU 3,

**Hydrophobic face : none****Nonpolar residues****Nonpolar residues (n / %)**

11 / 61.11

**Aromatic residues****Special residues**

CYS 0, PRO 6

[Click to enlarge](#)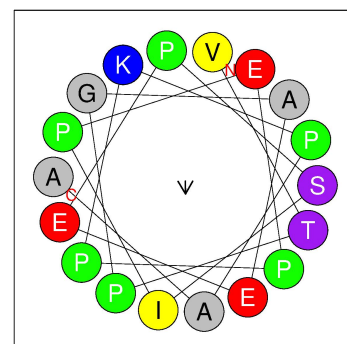[Go to screening](#)[Manual mutation](#)[GA mutation](#)

577 TPGAEEPSIPEPPKPA AD594

**Physico-chemical properties****Hydrophobicity <math>\langle H \rangle</math>**

0.199

**Hydrophobic moment <math>\langle \mu\_H \rangle</math>**

0.207

**Net charge  $z$** 

-3

**Polar residues + GLY****Polar residues + GLY (n / %)**

8 / 44.44

**Uncharged residues + GLY**

SER 1, THR 1, GLY 1

**Charged residues**

LYS 1, GLU 3, ASP 1,

**Hydrophobic face : none****Nonpolar residues****Nonpolar residues (n / %)**

10 / 55.56

**Aromatic residues****Special residues**

CYS 0, PRO 6

[Click to enlarge](#)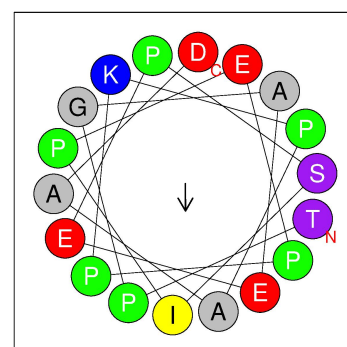[Go to screening](#)[Manual mutation](#)[GA mutation](#)

578 PGAEEPSIPEPPKPA ADQ595

**Physico-chemical properties****Hydrophobicity <math>\langle H \rangle</math>**

0.173

**Hydrophobic moment <math>\langle \mu\_H \rangle</math>**

0.201

**Net charge  $z$** 

-3

**Polar residues + GLY****Polar residues + GLY (n / %)**

8 / 44.44

**Uncharged residues + GLY**

GLN 1, SER 1, GLY 1

**Charged residues**

LYS 1, GLU 3, ASP 1,

**Hydrophobic face : none****Nonpolar residues****Nonpolar residues (n / %)**

10 / 55.56

**Aromatic residues****Special residues**

CYS 0, PRO 6

[Click to enlarge](#)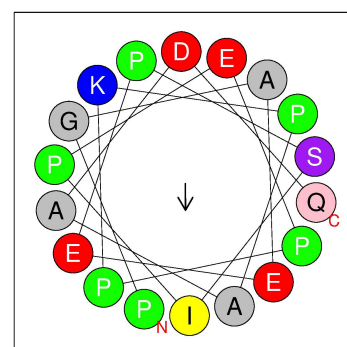[Go to screening](#)[Manual mutation](#)[GA mutation](#)

579 GAEEPSIPEPPKPA ADQD596

**Physico-chemical properties****Hydrophobicity <math>\langle H \rangle</math>**

0.090

**Polar residues + GLY****Polar residues + GLY (n / %)**

9 / 50.00

**Nonpolar residues****Nonpolar residues (n / %)**

9 / 50.00

[Click to enlarge](#)



**Hydrophobic moment  $\langle \mu_H \rangle$** 

0.125

**Net charge  $z$** 

-4

**Uncharged residues + GLY**

GLN 1, SER 1, GLY 1

**Charged residues**

LYS 1, GLU 3, ASP 2,

**Hydrophobic face : none****Aromatic residues****Special residues**

CYS 0, PRO 5

[Go to screening](#)[Manual mutation](#)[GA mutation](#)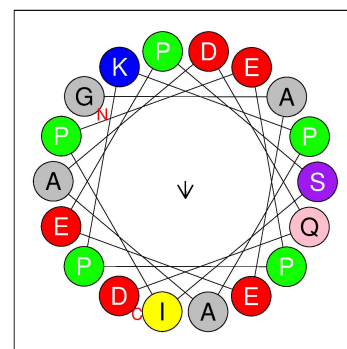

580AEEPSIPEPPKPAADQDG597

**Physico-chemical properties****Hydrophobicity  $\langle H \rangle$** 

0.090

**Hydrophobic moment  $\langle \mu_H \rangle$** 

0.125

**Net charge  $z$** 

-4

**Polar residues + GLY****Polar residues + GLY (n / %)**

9 / 50.00

**Uncharged residues + GLY**

GLN 1, SER 1, GLY 1

**Charged residues**

LYS 1, GLU 3, ASP 2,

**Hydrophobic face : none****Nonpolar residues****Nonpolar residues (n / %)**

9 / 50.00

**Aromatic residues****Special residues**

CYS 0, PRO 5

[Click to enlarge](#)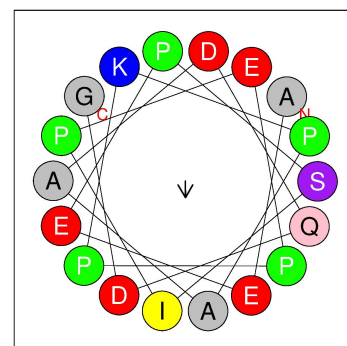[Go to screening](#)[Manual mutation](#)[GA mutation](#)

581EEPSIPEPPKPAADQDGA598

**Physico-chemical properties****Hydrophobicity  $\langle H \rangle$** 

0.090

**Hydrophobic moment  $\langle \mu_H \rangle$** 

0.125

**Net charge  $z$** 

-4

**Polar residues + GLY****Polar residues + GLY (n / %)**

9 / 50.00

**Uncharged residues + GLY**

GLN 1, SER 1, GLY 1

**Charged residues**

LYS 1, GLU 3, ASP 2,

**Hydrophobic face : none****Nonpolar residues****Nonpolar residues (n / %)**

9 / 50.00

**Aromatic residues****Special residues**

CYS 0, PRO 5

[Click to enlarge](#)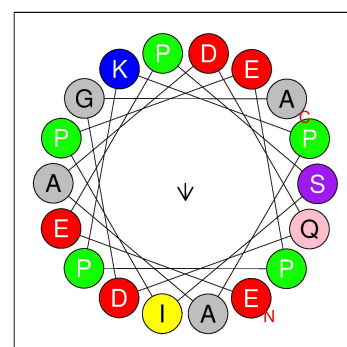[Go to screening](#)[Manual mutation](#)[GA mutation](#)

582EPSIPEPPKPAADQDGAEE599

**Physico-chemical properties****Hydrophobicity  $\langle H \rangle$** 

0.090

**Hydrophobic moment  $\langle \mu_H \rangle$** 

0.125

**Net charge  $z$** 

-4

**Polar residues + GLY****Polar residues + GLY (n / %)**

9 / 50.00

**Uncharged residues + GLY**

GLN 1, SER 1, GLY 1

**Charged residues**

LYS 1, GLU 3, ASP 2,

**Hydrophobic face : none****Nonpolar residues****Nonpolar residues (n / %)**

9 / 50.00

**Aromatic residues****Special residues**

CYS 0, PRO 5

[Click to enlarge](#)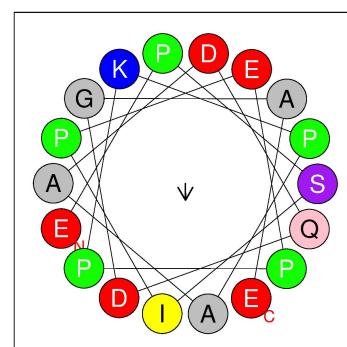[Go to screening](#)[Manual mutation](#)[GA mutation](#)

583PSIPEPPKPAADQDGAEEV600

**Physico-chemical properties****Hydrophobicity  $\langle H \rangle$** 

0.193

**Polar residues + GLY****Polar residues + GLY (n / %)**

8 / 44.44

**Nonpolar residues****Nonpolar residues (n / %)**

10 / 55.56

[Click to enlarge](#)

**Hydrophobic moment  $\langle \mu_H \rangle$** 

0.188

**Net charge  $z$** 

-3

**Uncharged residues + GLY**

GLN 1, SER 1, GLY 1

**Charged residues**

LYS 1, GLU 2, ASP 2,

**Hydrophobic face : none****Aromatic residues****Special residues**

CYS 0, PRO 5

[Go to screening](#)[Manual mutation](#)[GA mutation](#)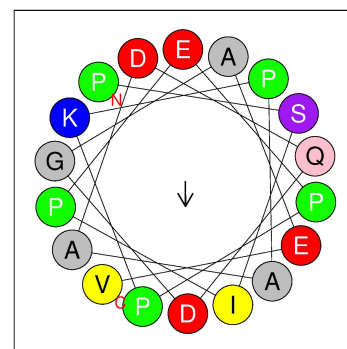

584SIPEPPKPAADQDGAEVL601

**Physico-chemical properties****Hydrophobicity  $\langle H \rangle$** 

0.248

**Hydrophobic moment  $\langle \mu_H \rangle$** 

0.151

**Net charge  $z$** 

-3

**Polar residues + GLY****Polar residues + GLY (n / %)**

8 / 44.44

**Uncharged residues + GLY**

GLN 1, SER 1, GLY 1

**Charged residues**

LYS 1, GLU 2, ASP 2,

**Hydrophobic face : none****Nonpolar residues****Nonpolar residues (n / %)**

10 / 55.56

**Aromatic residues****Special residues**

CYS 0, PRO 4

[Click to enlarge](#)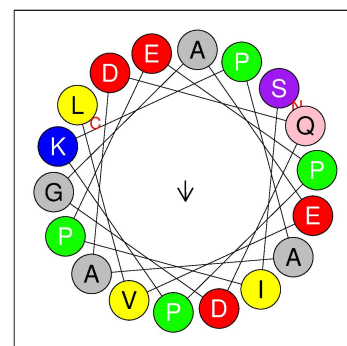[Go to screening](#)[Manual mutation](#)[GA mutation](#)

585IPEPPKPAADQDGAEVLG602

**Physico-chemical properties****Hydrophobicity  $\langle H \rangle$** 

0.250

**Hydrophobic moment  $\langle \mu_H \rangle$** 

0.149

**Net charge  $z$** 

-3

**Polar residues + GLY****Polar residues + GLY (n / %)**

8 / 44.44

**Uncharged residues + GLY**

GLN 1, GLY 2

**Charged residues**

LYS 1, GLU 2, ASP 2,

**Hydrophobic face : none****Nonpolar residues****Nonpolar residues (n / %)**

10 / 55.56

**Aromatic residues****Special residues**

CYS 0, PRO 4

[Click to enlarge](#)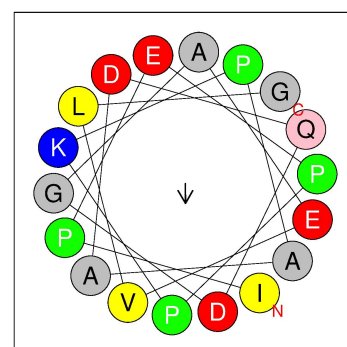[Go to screening](#)[Manual mutation](#)[GA mutation](#)

586PEPPKPAADQDGAEVLGT603

**Physico-chemical properties****Hydrophobicity  $\langle H \rangle$** 

0.164

**Hydrophobic moment  $\langle \mu_H \rangle$** 

0.092

**Net charge  $z$** 

-3

**Polar residues + GLY****Polar residues + GLY (n / %)**

9 / 50.00

**Uncharged residues + GLY**

GLN 1, THR 1, GLY 2

**Charged residues**

LYS 1, GLU 2, ASP 2,

**Hydrophobic face : none****Nonpolar residues****Nonpolar residues (n / %)**

9 / 50.00

**Aromatic residues****Special residues**

CYS 0, PRO 4

[Click to enlarge](#)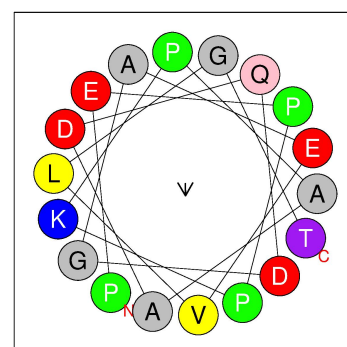[Go to screening](#)[Manual mutation](#)[GA mutation](#)

587EPPKPAADQDGAEVLGTR604

**Physico-chemical properties****Hydrophobicity  $\langle H \rangle$** 

0.068

**Polar residues + GLY****Polar residues + GLY (n / %)**

10 / 55.56

**Nonpolar residues****Nonpolar residues (n / %)**

8 / 44.44

[Click to enlarge](#)

**Hydrophobic moment <math>\langle \mu\_H \rangle</math>**

0.056

**Net charge  $z$** 

-2

**Uncharged residues + GLY**

GLN 1, THR 1, GLY 2

**Charged residues**

LYS 1, ARG 1, GLU 2, ASP 2,

**Hydrophobic face : none****Aromatic residues****Special residues**

CYS 0, PRO 3

[Go to screening](#)[Manual mutation](#)[GA mutation](#)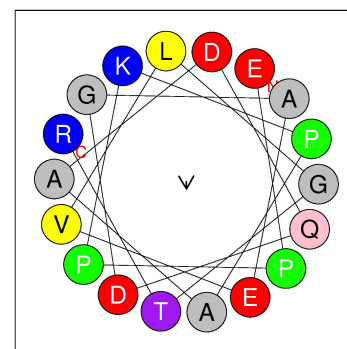

588PPKPAADQDGAEVLGTRSR605

**Physico-chemical properties****Hydrophobicity <math>\langle H \rangle</math>**

0.102

**Hydrophobic moment <math>\langle \mu\_H \rangle</math>**

0.032

**Net charge  $z$** 

-1

**Polar residues + GLY****Polar residues + GLY (n / %)**

10 / 55.56

**Uncharged residues + GLY**

GLN 1, SER 1, THR 1, GLY 2

**Charged residues**

LYS 1, ARG 1, GLU 1, ASP 2,

**Hydrophobic face : none****Nonpolar residues****Nonpolar residues (n / %)**

8 / 44.44

**Aromatic residues****Special residues**

CYS 0, PRO 3

[Click to enlarge](#)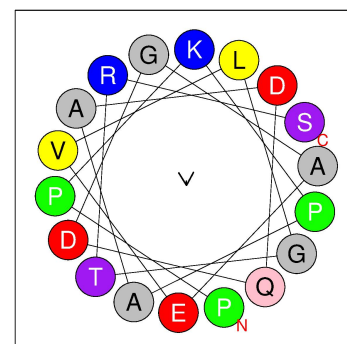[Go to screening](#)[Manual mutation](#)[GA mutation](#)

589PKPAADQDGAEVLGTRSR606

**Physico-chemical properties****Hydrophobicity <math>\langle H \rangle</math>**

0.006

**Hydrophobic moment <math>\langle \mu\_H \rangle</math>**

0.066

**Net charge  $z$** 

0

**Polar residues + GLY****Polar residues + GLY (n / %)**

11 / 61.11

**Uncharged residues + GLY**

GLN 1, SER 1, THR 1, GLY 2

**Charged residues**

LYS 1, ARG 2, GLU 1, ASP 2,

**Hydrophobic face : none****Nonpolar residues****Nonpolar residues (n / %)**

7 / 38.89

**Aromatic residues****Special residues**

CYS 0, PRO 2

[Click to enlarge](#)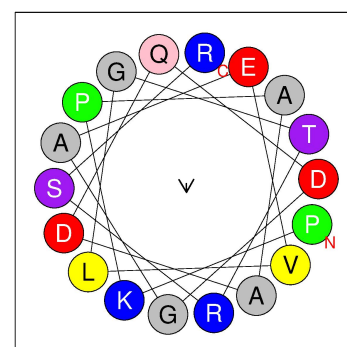[Go to screening](#)[Manual mutation](#)[GA mutation](#)

590KPAADQDGAEVLGTRSRSL607

**Physico-chemical properties****Hydrophobicity <math>\langle H \rangle</math>**

-0.037

**Hydrophobic moment <math>\langle \mu\_H \rangle</math>**

0.066

**Net charge  $z$** 

0

**Polar residues + GLY****Polar residues + GLY (n / %)**

12 / 66.67

**Uncharged residues + GLY**

GLN 1, SER 2, THR 1, GLY 2

**Charged residues**

LYS 1, ARG 2, GLU 1, ASP 2,

**Hydrophobic face : none****Nonpolar residues****Nonpolar residues (n / %)**

6 / 33.33

**Aromatic residues****Special residues**

CYS 0, PRO 1

[Click to enlarge](#)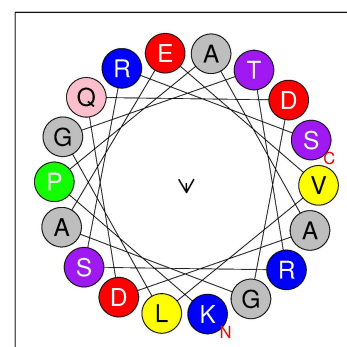[Go to screening](#)[Manual mutation](#)[GA mutation](#)

591PAADQDGAEVLGTRSRSL608

**Physico-chemical properties****Hydrophobicity <math>\langle H \rangle</math>**

0.113

**Polar residues + GLY****Polar residues + GLY (n / %)**

11 / 61.11

**Nonpolar residues****Nonpolar residues (n / %)**

7 / 38.89

[Click to enlarge](#)

**Hydrophobic moment <math>\langle \mu\_H \rangle</math>**

0.215

**Net charge  $z$** 

-1

**Uncharged residues + GLY**

GLN 1, SER 2, THR 1, GLY 2

**Charged residues**

ARG 2, GLU 1, ASP 2,

**Hydrophobic face : none****Aromatic residues****Special residues**

CYS 0, PRO 1

[Go to screening](#)[Manual mutation](#)[GA mutation](#)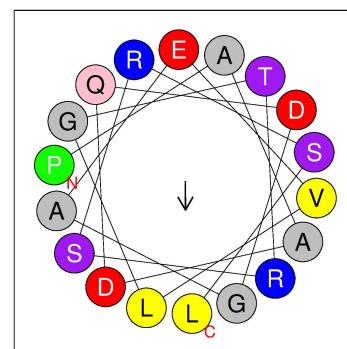592AADQDGAEVLGTRSRSLP<sub>609</sub>**Physico-chemical properties****Hydrophobicity <math>\langle H \rangle</math>**

0.113

**Hydrophobic moment <math>\langle \mu\_H \rangle</math>**

0.215

**Net charge  $z$** 

-1

**Polar residues + GLY****Polar residues + GLY (n / %)**

11 / 61.11

**Uncharged residues + GLY**

GLN 1, SER 2, THR 1, GLY 2

**Charged residues**

ARG 2, GLU 1, ASP 2,

**Hydrophobic face : none****Nonpolar residues****Nonpolar residues (n / %)**

7 / 38.89

**Aromatic residues****Special residues**

CYS 0, PRO 1

[Go to screening](#)[Manual mutation](#)[GA mutation](#)[Click to enlarge](#)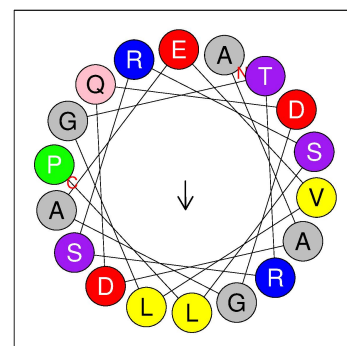593ADQDGAEVLGTRSRSLPE<sub>610</sub>**Physico-chemical properties****Hydrophobicity <math>\langle H \rangle</math>**

0.060

**Hydrophobic moment <math>\langle \mu\_H \rangle</math>**

0.266

**Net charge  $z$** 

-2

**Polar residues + GLY****Polar residues + GLY (n / %)**

12 / 66.67

**Uncharged residues + GLY**

GLN 1, SER 2, THR 1, GLY 2

**Charged residues**

ARG 2, GLU 2, ASP 2,

**Hydrophobic face : none****Nonpolar residues****Nonpolar residues (n / %)**

6 / 33.33

**Aromatic residues****Special residues**

CYS 0, PRO 1

[Go to screening](#)[Manual mutation](#)[GA mutation](#)[Click to enlarge](#)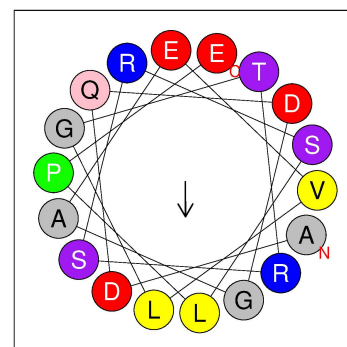594DQDGAEVLGTRSRSLPEK<sub>611</sub>**Physico-chemical properties****Hydrophobicity <math>\langle H \rangle</math>**

-0.012

**Hydrophobic moment <math>\langle \mu\_H \rangle</math>**

0.246

**Net charge  $z$** 

-1

**Polar residues + GLY****Polar residues + GLY (n / %)**

13 / 72.22

**Uncharged residues + GLY**

GLN 1, SER 2, THR 1, GLY 2

**Charged residues**

LYS 1, ARG 2, GLU 2, ASP 2,

**Hydrophobic face : none****Nonpolar residues****Nonpolar residues (n / %)**

5 / 27.78

**Aromatic residues****Special residues**

CYS 0, PRO 1

[Go to screening](#)[Manual mutation](#)[GA mutation](#)[Click to enlarge](#)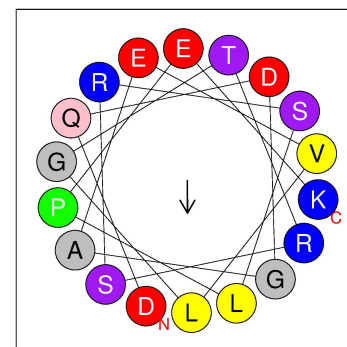595QDGAEVLGTRSRSLPEKG<sub>612</sub>**Physico-chemical properties****Hydrophobicity <math>\langle H \rangle</math>**

0.031

**Polar residues + GLY****Polar residues + GLY (n / %)**

13 / 72.22

**Nonpolar residues****Nonpolar residues (n / %)**

5 / 27.78

**Hydrophobic moment <math>\langle \mu\_H \rangle</math>**

0.287

**Net charge  $z$** 

0

**Uncharged residues + GLY**

GLN 1, SER 2, THR 1, GLY 3

**Charged residues**

LYS 1, ARG 2, GLU 2, ASP 1,

**Hydrophobic face : none****Aromatic residues****Special residues**

CYS 0, PRO 1

[Go to screening](#)[Manual mutation](#)[GA mutation](#)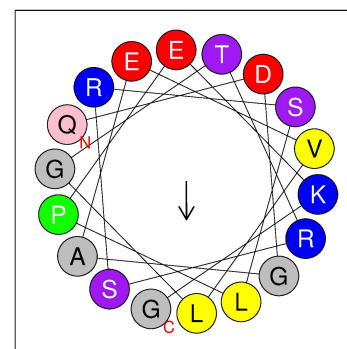596 **DGAEVLGTRSRSLPEKGP** 613**Physico-chemical properties****Hydrophobicity <math>\langle H \rangle</math>**

0.083

**Hydrophobic moment <math>\langle \mu\_H \rangle</math>**

0.269

**Net charge  $z$** 

0

**Polar residues + GLY****Polar residues + GLY (n / %)**

12 / 66.67

**Uncharged residues + GLY**

SER 2, THR 1, GLY 3

**Charged residues**

LYS 1, ARG 2, GLU 2, ASP 1,

**Hydrophobic face : none****Nonpolar residues****Nonpolar residues (n / %)**

6 / 33.33

**Aromatic residues****Special residues**

CYS 0, PRO 2

[Click to enlarge](#)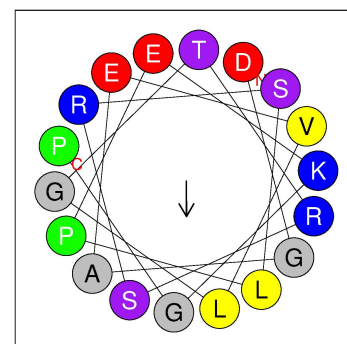[Go to screening](#)[Manual mutation](#)[GA mutation](#)597 **GAEVLGTRSRSLPEKGPP** 614**Physico-chemical properties****Hydrophobicity <math>\langle H \rangle</math>**

0.166

**Hydrophobic moment <math>\langle \mu\_H \rangle</math>**

0.197

**Net charge  $z$** 

1

**Polar residues + GLY****Polar residues + GLY (n / %)**

11 / 61.11

**Uncharged residues + GLY**

SER 2, THR 1, GLY 3

**Charged residues**

LYS 1, ARG 2, GLU 2,

**Hydrophobic face : none****Nonpolar residues****Nonpolar residues (n / %)**

7 / 38.89

**Aromatic residues****Special residues**

CYS 0, PRO 3

[Click to enlarge](#)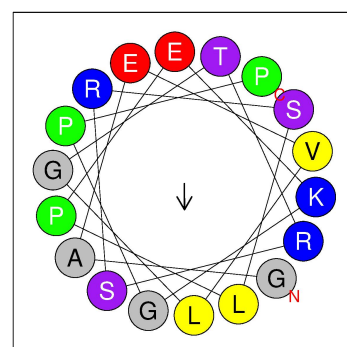[Go to screening](#)[Manual mutation](#)[GA mutation](#)598 **AEVLGTRSRSLPEKGPPK** 615**Physico-chemical properties****Hydrophobicity <math>\langle H \rangle</math>**

0.111

**Hydrophobic moment <math>\langle \mu\_H \rangle</math>**

0.162

**Net charge  $z$** 

2

**Polar residues + GLY****Polar residues + GLY (n / %)**

11 / 61.11

**Uncharged residues + GLY**

SER 2, THR 1, GLY 2

**Charged residues**

LYS 2, ARG 2, GLU 2,

**Hydrophobic face : none****Nonpolar residues****Nonpolar residues (n / %)**

7 / 38.89

**Aromatic residues****Special residues**

CYS 0, PRO 3

[Click to enlarge](#)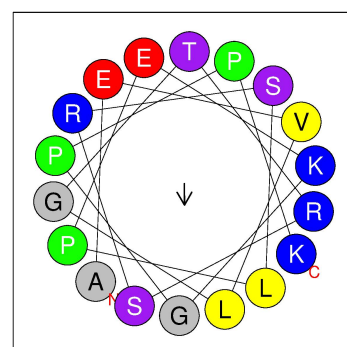[Go to screening](#)[Manual mutation](#)[GA mutation](#)599 **EVLGTRSRSLPEKGPPKA** 616**Physico-chemical properties****Hydrophobicity <math>\langle H \rangle</math>**

0.111

**Polar residues + GLY****Polar residues + GLY (n / %)**

11 / 61.11

**Nonpolar residues****Nonpolar residues (n / %)**

7 / 38.89

[Click to enlarge](#)



**Hydrophobic moment  $\langle \mu_H \rangle$** 

0.162

**Net charge  $z$** 

2

**Uncharged residues + GLY**

SER 2, THR 1, GLY 2

**Charged residues**

LYS 2, ARG 2, GLU 2,

**Hydrophobic face : none****Aromatic residues****Special residues**

CYS 0, PRO 3

[Go to screening](#)[Manual mutation](#)[GA mutation](#)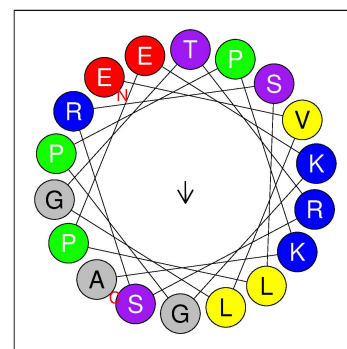

600VLGTRSRSLPEKGPPKAL617

**Physico-chemical properties****Hydrophobicity  $\langle H \rangle$** 

0.241

**Hydrophobic moment  $\langle \mu_H \rangle$** 

0.099

**Net charge  $z$** 

3

**Polar residues + GLY****Polar residues + GLY (n / %)**

10 / 55.56

**Uncharged residues + GLY**

SER 2, THR 1, GLY 2

**Charged residues**

LYS 2, ARG 2, GLU 1,

**Hydrophobic face : none****Nonpolar residues****Nonpolar residues (n / %)**

8 / 44.44

**Aromatic residues****Special residues**

CYS 0, PRO 3

[Click to enlarge](#)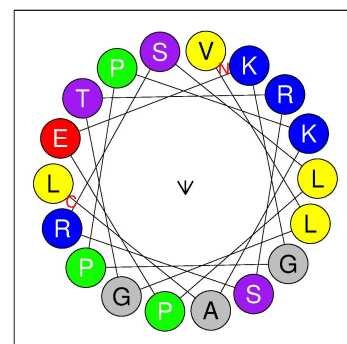[Go to screening](#)[Manual mutation](#)[GA mutation](#)

601LGTRSRSLPEKGPPKALA618

**Physico-chemical properties****Hydrophobicity  $\langle H \rangle$** 

0.190

**Hydrophobic moment  $\langle \mu_H \rangle$** 

0.150

**Net charge  $z$** 

3

**Polar residues + GLY****Polar residues + GLY (n / %)**

10 / 55.56

**Uncharged residues + GLY**

SER 2, THR 1, GLY 2

**Charged residues**

LYS 2, ARG 2, GLU 1,

**Hydrophobic face : none****Nonpolar residues****Nonpolar residues (n / %)**

8 / 44.44

**Aromatic residues****Special residues**

CYS 0, PRO 3

[Click to enlarge](#)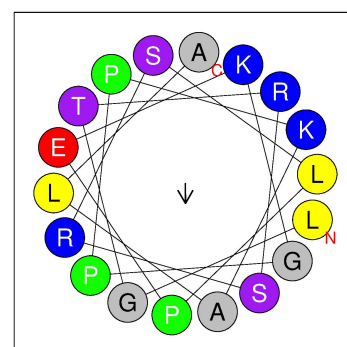[Go to screening](#)[Manual mutation](#)[GA mutation](#)

602GTRSRSLPEKGPPKALAY619

**Physico-chemical properties****Hydrophobicity  $\langle H \rangle$** 

0.149

**Hydrophobic moment  $\langle \mu_H \rangle$** 

0.144

**Net charge  $z$** 

3

**Polar residues + GLY****Polar residues + GLY (n / %)**

10 / 55.56

**Uncharged residues + GLY**

SER 2, THR 1, GLY 2

**Charged residues**

LYS 2, ARG 2, GLU 1,

**Hydrophobic face : none****Nonpolar residues****Nonpolar residues (n / %)**

8 / 44.44

**Aromatic residues**

TYR 1,

**Special residues**

CYS 0, PRO 3

[Click to enlarge](#)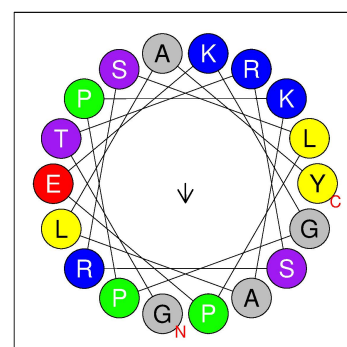[Go to screening](#)[Manual mutation](#)[GA mutation](#)

603TRSRSLPEKGPPKALAYK620

**Physico-chemical properties****Hydrophobicity  $\langle H \rangle$** 

0.094

**Polar residues + GLY****Polar residues + GLY (n / %)**

10 / 55.56

**Nonpolar residues****Nonpolar residues (n / %)**

8 / 44.44

[Click to enlarge](#)



**Hydrophobic moment <math>\langle \mu\_H \rangle</math>**

0.090

**Net charge  $z$** 

4

**Uncharged residues + GLY**

SER 2, THR 1, GLY 1

**Charged residues**

LYS 3, ARG 2, GLU 1,

**Hydrophobic face : none****Aromatic residues**

TYR 1,

**Special residues**

CYS 0, PRO 3

[Go to screening](#)[Manual mutation](#)[GA mutation](#)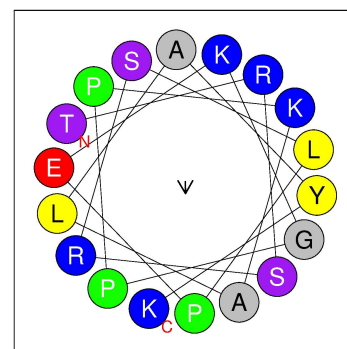

604RSRSLPEKGPPKALAYKT621

**Physico-chemical properties****Hydrophobicity <math>\langle H \rangle</math>**

0.094

**Hydrophobic moment <math>\langle \mu\_H \rangle</math>**

0.090

**Net charge  $z$** 

4

**Polar residues + GLY****Polar residues + GLY (n / %)**

10 / 55.56

**Uncharged residues + GLY**

SER 2, THR 1, GLY 1

**Charged residues**

LYS 3, ARG 2, GLU 1,

**Hydrophobic face : none****Nonpolar residues****Nonpolar residues (n / %)**

8 / 44.44

**Aromatic residues**

TYR 1,

**Special residues**

CYS 0, PRO 3

[Go to screening](#)[Manual mutation](#)[GA mutation](#)[Click to enlarge](#)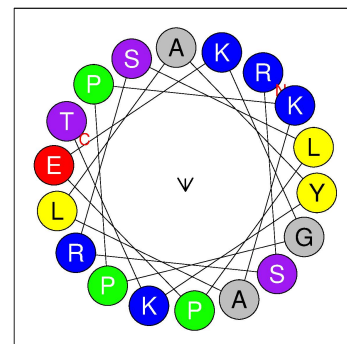

605SRSLPEKGPPKALAYKTV622

**Physico-chemical properties****Hydrophobicity <math>\langle H \rangle</math>**

0.218

**Hydrophobic moment <math>\langle \mu\_H \rangle</math>**

0.074

**Net charge  $z$** 

3

**Polar residues + GLY****Polar residues + GLY (n / %)**

9 / 50.00

**Uncharged residues + GLY**

SER 2, THR 1, GLY 1

**Charged residues**

LYS 3, ARG 1, GLU 1,

**Hydrophobic face : none****Nonpolar residues****Nonpolar residues (n / %)**

9 / 50.00

**Aromatic residues**

TYR 1,

**Special residues**

CYS 0, PRO 3

[Go to screening](#)[Manual mutation](#)[GA mutation](#)[Click to enlarge](#)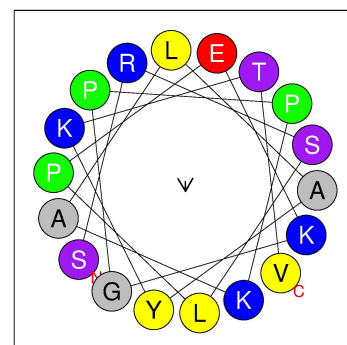

606RSLPEKGPPKALAYKTVE623

**Physico-chemical properties****Hydrophobicity <math>\langle H \rangle</math>**

0.184

**Hydrophobic moment <math>\langle \mu\_H \rangle</math>**

0.060

**Net charge  $z$** 

2

**Polar residues + GLY****Polar residues + GLY (n / %)**

9 / 50.00

**Uncharged residues + GLY**

SER 1, THR 1, GLY 1

**Charged residues**

LYS 3, ARG 1, GLU 2,

**Hydrophobic face : none****Nonpolar residues****Nonpolar residues (n / %)**

9 / 50.00

**Aromatic residues**

TYR 1,

**Special residues**

CYS 0, PRO 3

[Go to screening](#)[Manual mutation](#)[GA mutation](#)[Click to enlarge](#)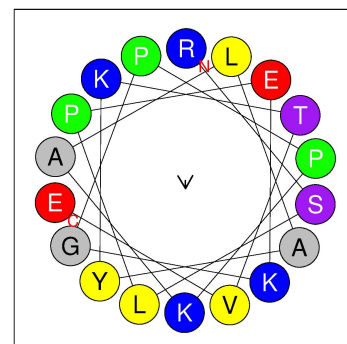

607SLPEKGPPKALAYKTVEV624

**Physico-chemical properties****Hydrophobicity <math>\langle H \rangle</math>**

0.308

**Polar residues + GLY****Polar residues + GLY (n / %)**

8 / 44.44

**Nonpolar residues****Nonpolar residues (n / %)**

10 / 55.56

1

**Hydrophobic face :** none

CYS 0, PRO 3

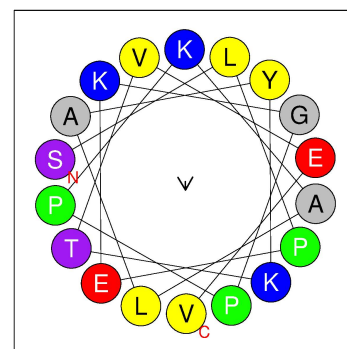

## GA mutation

1

**Hydrophobic face :** none

CYS 0, PRO 3

## GA mutation

O

**Hydrophobic face :** none

CYS 0, PRO 3

O

**Hydrophobic face :** none

CYS 0, PRO 2

## GA mutation

Click to enlarge

**Hydrophobic moment  $\langle \mu_H \rangle$** 

0.350

**Net charge  $z$** 

1

**Uncharged residues + GLY**

SER 1, THR 1, GLY 1

**Charged residues**

LYS 3, GLU 2,

**Hydrophobic face : none****Aromatic residues**

TYR 1,

**Special residues**

CYS 0, PRO 2

[Go to screening](#)[Manual mutation](#)[GA mutation](#)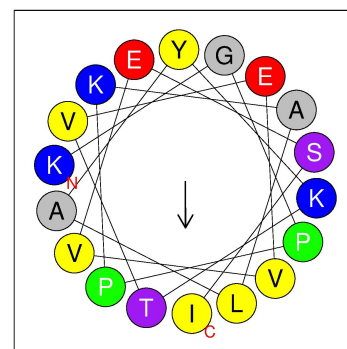

612GPPKALAYKTVEEVVESIE629

**Physico-chemical properties****Hydrophobicity  $\langle H \rangle$** 

0.361

**Hydrophobic moment  $\langle \mu_H \rangle$** 

0.348

**Net charge  $z$** 

-1

**Polar residues + GLY****Polar residues + GLY (n / %)**

8 / 44.44

**Uncharged residues + GLY**

SER 1, THR 1, GLY 1

**Charged residues**

LYS 2, GLU 3,

**Hydrophobic face : none****Nonpolar residues****Nonpolar residues (n / %)**

10 / 55.56

**Aromatic residues**

TYR 1,

**Special residues**

CYS 0, PRO 2

[Click to enlarge](#)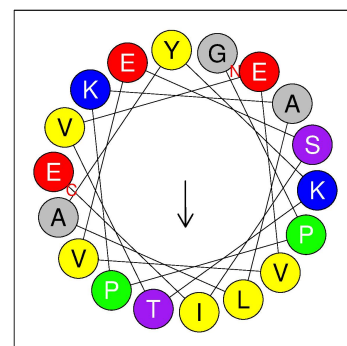[Go to screening](#)[Manual mutation](#)[GA mutation](#)

613PPKALAYKTVEEVVESIEK630

**Physico-chemical properties****Hydrophobicity  $\langle H \rangle$** 

0.306

**Hydrophobic moment  $\langle \mu_H \rangle$** 

0.401

**Net charge  $z$** 

0

**Polar residues + GLY****Polar residues + GLY (n / %)**

8 / 44.44

**Uncharged residues + GLY**

SER 1, THR 1, GLY 0

**Charged residues**

LYS 3, GLU 3,

**Hydrophobic face : none****Nonpolar residues****Nonpolar residues (n / %)**

10 / 55.56

**Aromatic residues**

TYR 1,

**Special residues**

CYS 0, PRO 2

[Click to enlarge](#)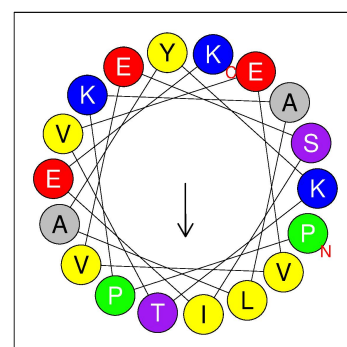[Go to screening](#)[Manual mutation](#)[GA mutation](#)

614PKALAYKTVEEVVESIEKI631

**Physico-chemical properties****Hydrophobicity  $\langle H \rangle$** 

0.366

**Hydrophobic moment  $\langle \mu_H \rangle$** 

0.427

**Net charge  $z$** 

0

**Polar residues + GLY****Polar residues + GLY (n / %)**

8 / 44.44

**Uncharged residues + GLY**

SER 1, THR 1, GLY 0

**Charged residues**

LYS 3, GLU 3,

**Hydrophobic face : none****Nonpolar residues****Nonpolar residues (n / %)**

10 / 55.56

**Aromatic residues**

TYR 1,

**Special residues**

CYS 0, PRO 1

[Click to enlarge](#)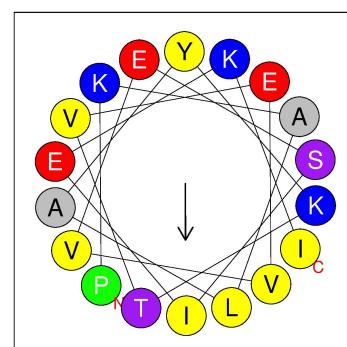[Go to screening](#)[Manual mutation](#)[GA mutation](#)

615KALAYKTVEEVVESIEKIS632

**Physico-chemical properties****Hydrophobicity  $\langle H \rangle$** 

0.324

**Polar residues + GLY****Polar residues + GLY (n / %)**

9 / 50.00

**Nonpolar residues****Nonpolar residues (n / %)**

9 / 50.00

[Click to enlarge](#)

**Hydrophobic moment  $\langle\mu_H\rangle$** 

0.396

**Net charge  $z$** 

0

**Uncharged residues + GLY**

SER 2, THR 1, GLY 0

**Charged residues**

LYS 3, GLU 3,

**Hydrophobic face : none****Aromatic residues**

TYR 1,

**Special residues**

CYS 0, PRO 0

[Go to screening](#)[Manual mutation](#)[GA mutation](#)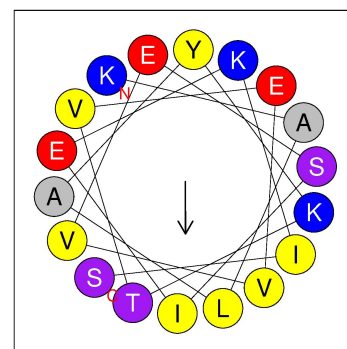<sup>616</sup>ALAYKTVEEVVESIEKIST<sub>633</sub>**Physico-chemical properties****Hydrophobicity  $\langle H \rangle$** 

0.393

**Hydrophobic moment  $\langle\mu_H\rangle$** 

0.342

**Net charge  $z$** 

-1

**Polar residues + GLY****Polar residues + GLY (n / %)**

9 / 50.00

**Uncharged residues + GLY**

SER 2, THR 2, GLY 0

**Charged residues**

LYS 2, GLU 3,

**Hydrophobic face : none****Nonpolar residues****Nonpolar residues (n / %)**

9 / 50.00

**Aromatic residues**

TYR 1,

**Special residues**

CYS 0, PRO 0

[Go to screening](#)[Manual mutation](#)[GA mutation](#)[Click to enlarge](#)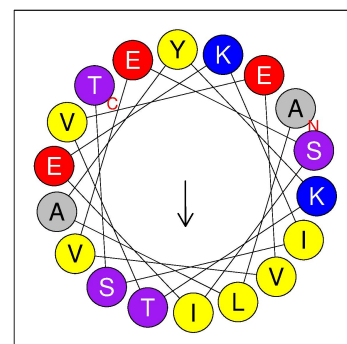<sup>617</sup>LAYKTVEEVVESIEKISTE<sub>634</sub>**Physico-chemical properties****Hydrophobicity  $\langle H \rangle$** 

0.341

**Hydrophobic moment  $\langle\mu_H\rangle$** 

0.374

**Net charge  $z$** 

-2

**Polar residues + GLY****Polar residues + GLY (n / %)**

10 / 55.56

**Uncharged residues + GLY**

SER 2, THR 2, GLY 0

**Charged residues**

LYS 2, GLU 4,

**Hydrophobic face : none****Nonpolar residues****Nonpolar residues (n / %)**

8 / 44.44

**Aromatic residues**

TYR 1,

**Special residues**

CYS 0, PRO 0

[Go to screening](#)[Manual mutation](#)[GA mutation](#)[Click to enlarge](#)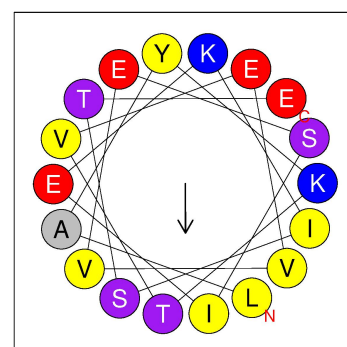<sup>618</sup>AYKTVEEVVESIEKISTES<sub>635</sub>**Physico-chemical properties****Hydrophobicity  $\langle H \rangle$** 

0.244

**Hydrophobic moment  $\langle\mu_H\rangle$** 

0.295

**Net charge  $z$** 

-2

**Polar residues + GLY****Polar residues + GLY (n / %)**

11 / 61.11

**Uncharged residues + GLY**

SER 3, THR 2, GLY 0

**Charged residues**

LYS 2, GLU 4,

**Hydrophobic face : none****Nonpolar residues****Nonpolar residues (n / %)**

7 / 38.89

**Aromatic residues**

TYR 1,

**Special residues**

CYS 0, PRO 0

[Go to screening](#)[Manual mutation](#)[GA mutation](#)[Click to enlarge](#)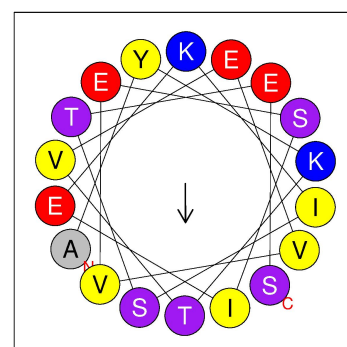<sup>619</sup>YKTVEEVVESIEKISTESI<sub>636</sub>**Physico-chemical properties****Hydrophobicity  $\langle H \rangle$** 

0.327

**Polar residues + GLY****Polar residues + GLY (n / %)**

11 / 61.11

**Nonpolar residues****Nonpolar residues (n / %)**

7 / 38.89

[Click to enlarge](#)

**Hydrophobic moment**  $\langle \mu_H \rangle$   
0.343  
**Net charge**  $z$   
-2

**Uncharged residues + GLY**  
SER 3, THR 2, GLY 0  
**Charged residues**  
LYS 2, GLU 4,  
**Hydrophobic face** : none

**Aromatic residues**  
TYR 1,  
**Special residues**  
CYS 0, PRO 0

[Go to screening](#)

[Manual mutation](#)

[GA mutation](#)

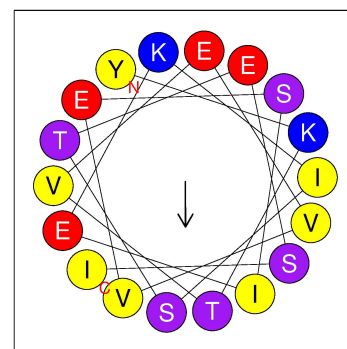

**Physico-chemical properties**  
**Hydrophobicity**  $\langle H \rangle$   
0.261  
**Hydrophobic moment**  $\langle \mu_H \rangle$   
0.401  
**Net charge**  $z$   
-2

620KTVEVVESIEKISTESIQ637

**Polar residues + GLY**  
**Polar residues + GLY (n / %)**  
12 / 66.67  
**Uncharged residues + GLY**  
GLN 1, SER 3, THR 2, GLY 0  
**Charged residues**  
LYS 2, GLU 4,  
**Hydrophobic face** : none

**Nonpolar residues**  
**Nonpolar residues (n / %)**  
6 / 33.33  
**Aromatic residues**  
**Special residues**  
CYS 0, PRO 0

[Go to screening](#)

[Manual mutation](#)

[GA mutation](#)

[Click to enlarge](#)

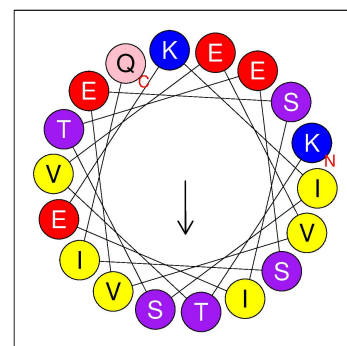

**Physico-chemical properties**  
**Hydrophobicity**  $\langle H \rangle$   
0.331  
**Hydrophobic moment**  $\langle \mu_H \rangle$   
0.386  
**Net charge**  $z$   
-3

621TVEVVESIEKISTESIQT638

**Polar residues + GLY**  
**Polar residues + GLY (n / %)**  
12 / 66.67  
**Uncharged residues + GLY**  
GLN 1, SER 3, THR 3, GLY 0  
**Charged residues**  
LYS 1, GLU 4,  
**Hydrophobic face** : none

**Nonpolar residues**  
**Nonpolar residues (n / %)**  
6 / 33.33  
**Aromatic residues**  
**Special residues**  
CYS 0, PRO 0

[Go to screening](#)

[Manual mutation](#)

[GA mutation](#)

[Click to enlarge](#)

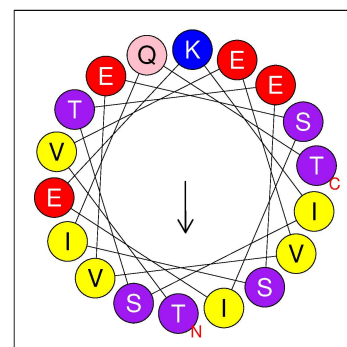

**Physico-chemical properties**  
**Hydrophobicity**  $\langle H \rangle$   
0.369  
**Hydrophobic moment**  $\langle \mu_H \rangle$   
0.425  
**Net charge**  $z$   
-3

622VEVVESIEKISTESIQTY639

**Polar residues + GLY**  
**Polar residues + GLY (n / %)**  
11 / 61.11  
**Uncharged residues + GLY**  
GLN 1, SER 3, THR 2, GLY 0  
**Charged residues**  
LYS 1, GLU 4,  
**Hydrophobic face** : none

**Nonpolar residues**  
**Nonpolar residues (n / %)**  
7 / 38.89  
**Aromatic residues**  
TYR 1,  
**Special residues**  
CYS 0, PRO 0

[Go to screening](#)

[Manual mutation](#)

[GA mutation](#)

[Click to enlarge](#)

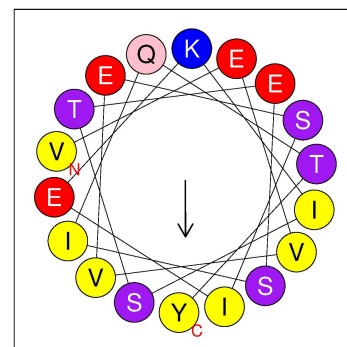

**Physico-chemical properties**  
**Hydrophobicity**  $\langle H \rangle$   
0.266

623EVVESIEKISTESIQTYE640

**Polar residues + GLY**  
**Polar residues + GLY (n / %)**  
12 / 66.67

**Nonpolar residues**  
**Nonpolar residues (n / %)**  
6 / 33.33

[Click to enlarge](#)



**Hydrophobic moment <math>\langle \mu\_H \rangle</math>**

0.459

**Net charge  $z$** 

-4

**Uncharged residues + GLY**

GLN 1, SER 3, THR 2, GLY 0

**Charged residues**

LYS 1, GLU 5,

**Hydrophobic face : none****Aromatic residues**

TYR 1,

**Special residues**

CYS 0, PRO 0

[Go to screening](#)[Manual mutation](#)[GA mutation](#)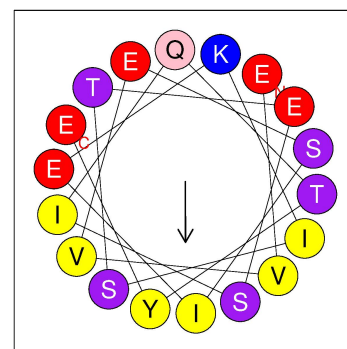

624 VVESIEKISTESIQTYEE 641

**Physico-chemical properties****Hydrophobicity <math>\langle H \rangle</math>**

0.266

**Hydrophobic moment <math>\langle \mu\_H \rangle</math>**

0.459

**Net charge  $z$** 

-4

**Polar residues + GLY****Polar residues + GLY (n / %)**

12 / 66.67

**Uncharged residues + GLY**

GLN 1, SER 3, THR 2, GLY 0

**Charged residues**

LYS 1, GLU 5,

**Hydrophobic face : none****Nonpolar residues****Nonpolar residues (n / %)**

6 / 33.33

**Aromatic residues**

TYR 1,

**Special residues**

CYS 0, PRO 0

[Go to screening](#)[Manual mutation](#)[GA mutation](#)[Click to enlarge](#)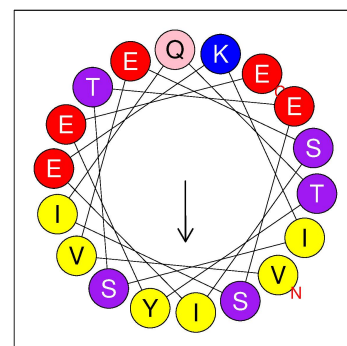

625 VESIEKISTESIQTYEET 642

**Physico-chemical properties****Hydrophobicity <math>\langle H \rangle</math>**

0.213

**Hydrophobic moment <math>\langle \mu\_H \rangle</math>**

0.423

**Net charge  $z$** 

-4

**Polar residues + GLY****Polar residues + GLY (n / %)**

13 / 72.22

**Uncharged residues + GLY**

GLN 1, SER 3, THR 3, GLY 0

**Charged residues**

LYS 1, GLU 5,

**Hydrophobic face : none****Nonpolar residues****Nonpolar residues (n / %)**

5 / 27.78

**Aromatic residues**

TYR 1,

**Special residues**

CYS 0, PRO 0

[Go to screening](#)[Manual mutation](#)[GA mutation](#)[Click to enlarge](#)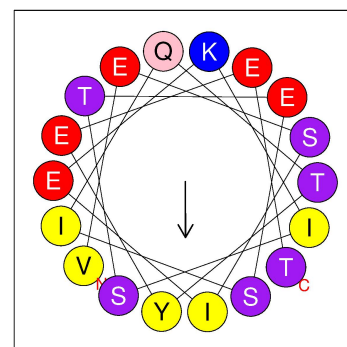

626 ESIEKISTESIQTYEETA 643

**Physico-chemical properties****Hydrophobicity <math>\langle H \rangle</math>**

0.162

**Hydrophobic moment <math>\langle \mu\_H \rangle</math>**

0.392

**Net charge  $z$** 

-4

**Polar residues + GLY****Polar residues + GLY (n / %)**

13 / 72.22

**Uncharged residues + GLY**

GLN 1, SER 3, THR 3, GLY 0

**Charged residues**

LYS 1, GLU 5,

**Hydrophobic face : none****Nonpolar residues****Nonpolar residues (n / %)**

5 / 27.78

**Aromatic residues**

TYR 1,

**Special residues**

CYS 0, PRO 0

[Go to screening](#)[Manual mutation](#)[GA mutation](#)[Click to enlarge](#)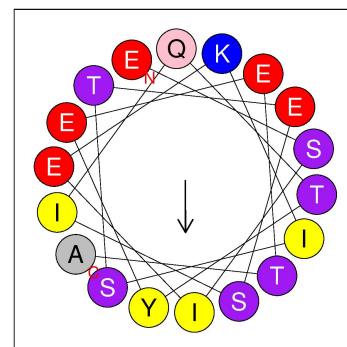

627 SIEKISTESIQTYEETAV 644

**Physico-chemical properties****Hydrophobicity <math>\langle H \rangle</math>**

0.266

**Polar residues + GLY****Polar residues + GLY (n / %)**

12 / 66.67

**Nonpolar residues****Nonpolar residues (n / %)**

6 / 33.33



**Hydrophobic moment  $\langle\mu_H\rangle$** 

0.301

**Net charge  $z$** 

-3

**Uncharged residues + GLY**

GLN 1, SER 3, THR 3, GLY 0

**Charged residues**

LYS 1, GLU 4,

**Hydrophobic face : none****Aromatic residues**

TYR 1,

**Special residues**

CYS 0, PRO 0

[Go to screening](#)[Manual mutation](#)[GA mutation](#)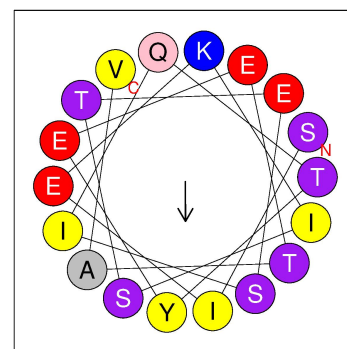

628 IEKISTESIQTYEETAVI 645

**Physico-chemical properties****Hydrophobicity  $\langle H \rangle$** 

0.368

**Hydrophobic moment  $\langle\mu_H\rangle$** 

0.279

**Net charge  $z$** 

-3

**Polar residues + GLY****Polar residues + GLY (n / %)**

11 / 61.11

**Uncharged residues + GLY**

GLN 1, SER 2, THR 3, GLY 0

**Charged residues**

LYS 1, GLU 4,

**Hydrophobic face : none****Nonpolar residues****Nonpolar residues (n / %)**

7 / 38.89

**Aromatic residues**

TYR 1,

**Special residues**

CYS 0, PRO 0

[Go to screening](#)[Manual mutation](#)[GA mutation](#)[Click to enlarge](#)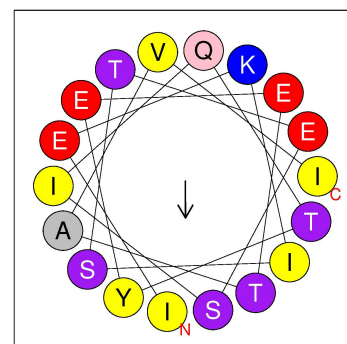

629 EKISTESIQTYEETAVIV 646

**Physico-chemical properties****Hydrophobicity  $\langle H \rangle$** 

0.336

**Hydrophobic moment  $\langle\mu_H\rangle$** 

0.247

**Net charge  $z$** 

-3

**Polar residues + GLY****Polar residues + GLY (n / %)**

11 / 61.11

**Uncharged residues + GLY**

GLN 1, SER 2, THR 3, GLY 0

**Charged residues**

LYS 1, GLU 4,

**Hydrophobic face : none****Nonpolar residues****Nonpolar residues (n / %)**

7 / 38.89

**Aromatic residues**

TYR 1,

**Special residues**

CYS 0, PRO 0

[Go to screening](#)[Manual mutation](#)[GA mutation](#)[Click to enlarge](#)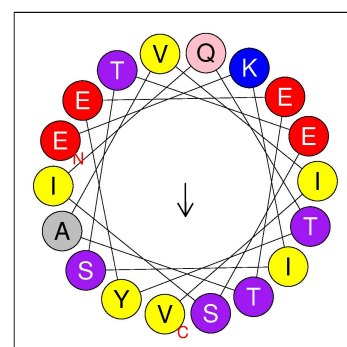

630 KISTESIQTYEETAVIVE 647

**Physico-chemical properties****Hydrophobicity  $\langle H \rangle$** 

0.336

**Hydrophobic moment  $\langle\mu_H\rangle$** 

0.247

**Net charge  $z$** 

-3

**Polar residues + GLY****Polar residues + GLY (n / %)**

11 / 61.11

**Uncharged residues + GLY**

GLN 1, SER 2, THR 3, GLY 0

**Charged residues**

LYS 1, GLU 4,

**Hydrophobic face : none****Nonpolar residues****Nonpolar residues (n / %)**

7 / 38.89

**Aromatic residues**

TYR 1,

**Special residues**

CYS 0, PRO 0

[Go to screening](#)[Manual mutation](#)[GA mutation](#)[Click to enlarge](#)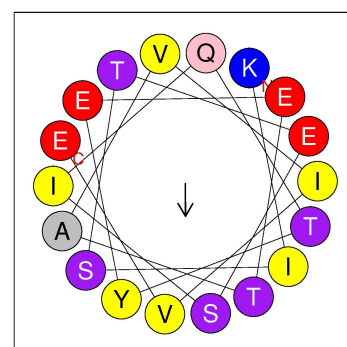

631 ISTESIQTYEETAVIVET 648

**Physico-chemical properties****Hydrophobicity  $\langle H \rangle$** 

0.405

**Polar residues + GLY****Polar residues + GLY (n / %)**

11 / 61.11

**Nonpolar residues****Nonpolar residues (n / %)**

7 / 38.89

[Click to enlarge](#)

**Hydrophobic moment  $\langle\mu_H\rangle$** 

0.190

**Net charge  $z$** 

-4

**Uncharged residues + GLY**

GLN 1, SER 2, THR 4, GLY 0

**Charged residues**

GLU 4,

**Hydrophobic face : none****Aromatic residues**

TYR 1,

**Special residues**

CYS 0, PRO 0

[Go to screening](#)[Manual mutation](#)[GA mutation](#)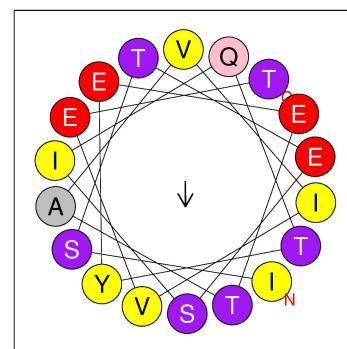<sup>632</sup>STESIQTYYEETAVIVETM<sub>649</sub>**Physico-chemical properties****Hydrophobicity  $\langle H \rangle$** 

0.373

**Hydrophobic moment  $\langle\mu_H\rangle$** 

0.167

**Net charge  $z$** 

-4

**Polar residues + GLY****Polar residues + GLY (n / %)**

11 / 61.11

**Uncharged residues + GLY**

GLN 1, SER 2, THR 4, GLY 0

**Charged residues**

GLU 4,

**Hydrophobic face : none****Nonpolar residues****Nonpolar residues (n / %)**

7 / 38.89

**Aromatic residues**

TYR 1,

**Special residues**

CYS 0, PRO 0

[Go to screening](#)[Manual mutation](#)[GA mutation](#)[Click to enlarge](#)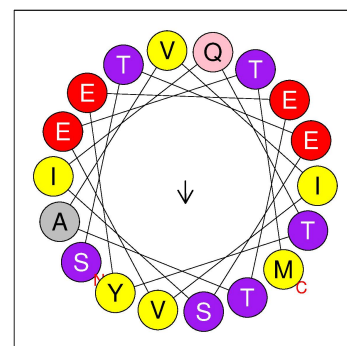<sup>633</sup>TESIQTYYEETAVIVETMI<sub>650</sub>**Physico-chemical properties****Hydrophobicity  $\langle H \rangle$** 

0.476

**Hydrophobic moment  $\langle\mu_H\rangle$** 

0.244

**Net charge  $z$** 

-4

**Polar residues + GLY****Polar residues + GLY (n / %)**

10 / 55.56

**Uncharged residues + GLY**

GLN 1, SER 1, THR 4, GLY 0

**Charged residues**

GLU 4,

**Hydrophobic face : V Y I A I****Nonpolar residues****Nonpolar residues (n / %)**

8 / 44.44

**Aromatic residues**

TYR 1,

**Special residues**

CYS 0, PRO 0

[Go to screening](#)[Manual mutation](#)[GA mutation](#)[Click to enlarge](#)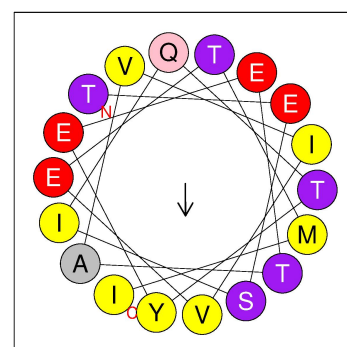<sup>634</sup>ESIQTYYEETAVIVETMIG<sub>651</sub>**Physico-chemical properties****Hydrophobicity  $\langle H \rangle$** 

0.461

**Hydrophobic moment  $\langle\mu_H\rangle$** 

0.254

**Net charge  $z$** 

-4

**Polar residues + GLY****Polar residues + GLY (n / %)**

10 / 55.56

**Uncharged residues + GLY**

GLN 1, SER 1, THR 3, GLY 1

**Charged residues**

GLU 4,

**Hydrophobic face : V Y I A I****Nonpolar residues****Nonpolar residues (n / %)**

8 / 44.44

**Aromatic residues**

TYR 1,

**Special residues**

CYS 0, PRO 0

[Go to screening](#)[Manual mutation](#)[GA mutation](#)[Click to enlarge](#)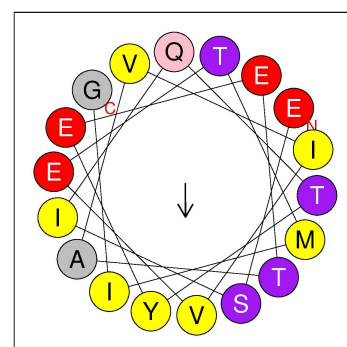<sup>635</sup>SIQTYYEETAVIVETMIGK<sub>652</sub>**Physico-chemical properties****Hydrophobicity  $\langle H \rangle$** 

0.442

**Polar residues + GLY****Polar residues + GLY (n / %)**

10 / 55.56

**Nonpolar residues****Nonpolar residues (n / %)**

8 / 44.44

[Click to enlarge](#)

**Hydrophobic moment  $\langle \mu_H \rangle$**   
0.265  
**Net charge  $z$**   
-2

**Uncharged residues + GLY**  
GLN 1, SER 1, THR 3, GLY 1

**Charged residues**  
LYS 1, GLU 3,

**Hydrophobic face : V Y I A I**

[Go to screening](#)

[Manual mutation](#)

**Aromatic residues**  
TYR 1,

**Special residues**  
CYS 0, PRO 0

[GA mutation](#)

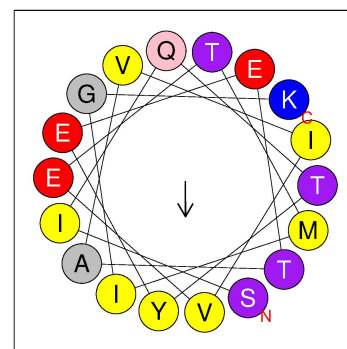

636 IQTYEETAVIVETMIGKT653

**Physico-chemical properties**

**Hydrophobicity  $\langle H \rangle$**

0.458

**Hydrophobic moment  $\langle \mu_H \rangle$**

0.280

**Net charge  $z$**

-2

**Polar residues + GLY**

**Polar residues + GLY (n / %)**

10 / 55.56

**Uncharged residues + GLY**

GLN 1, THR 4, GLY 1

**Charged residues**

LYS 1, GLU 3,

**Hydrophobic face : V Y I A I**

**Nonpolar residues**

**Nonpolar residues (n / %)**

8 / 44.44

**Aromatic residues**

TYR 1,

**Special residues**

CYS 0, PRO 0

[Go to screening](#)

[Manual mutation](#)

[GA mutation](#)

[Click to enlarge](#)

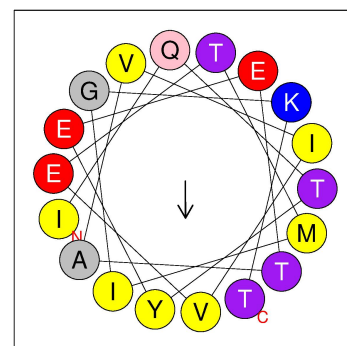

637 QTYEETAVIVETMIGKTK654

**Physico-chemical properties**

**Hydrophobicity  $\langle H \rangle$**

0.303

**Hydrophobic moment  $\langle \mu_H \rangle$**

0.278

**Net charge  $z$**

-1

**Polar residues + GLY**

**Polar residues + GLY (n / %)**

11 / 61.11

**Uncharged residues + GLY**

GLN 1, THR 4, GLY 1

**Charged residues**

LYS 2, GLU 3,

**Hydrophobic face : none**

**Nonpolar residues**

**Nonpolar residues (n / %)**

7 / 38.89

**Aromatic residues**

TYR 1,

**Special residues**

CYS 0, PRO 0

[Go to screening](#)

[Manual mutation](#)

[GA mutation](#)

[Click to enlarge](#)

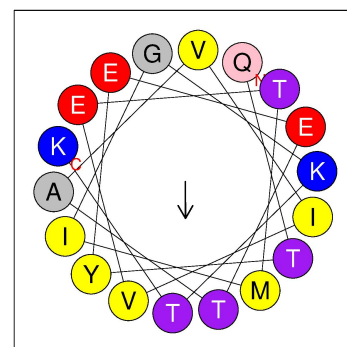

638 TYEETAVIVETMIGKTKS655

**Physico-chemical properties**

**Hydrophobicity  $\langle H \rangle$**

0.313

**Hydrophobic moment  $\langle \mu_H \rangle$**

0.269

**Net charge  $z$**

-1

**Polar residues + GLY**

**Polar residues + GLY (n / %)**

11 / 61.11

**Uncharged residues + GLY**

SER 1, THR 4, GLY 1

**Charged residues**

LYS 2, GLU 3,

**Hydrophobic face : none**

**Nonpolar residues**

**Nonpolar residues (n / %)**

7 / 38.89

**Aromatic residues**

TYR 1,

**Special residues**

CYS 0, PRO 0

[Go to screening](#)

[Manual mutation](#)

[GA mutation](#)

[Click to enlarge](#)

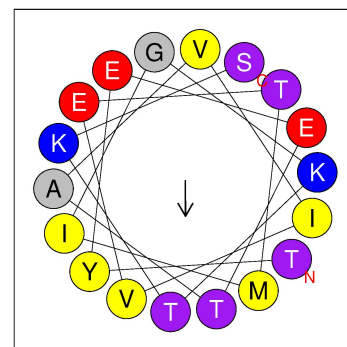

639 YEETAVIVETMIGKTKSD656

**Physico-chemical properties**

**Hydrophobicity  $\langle H \rangle$**

0.256

**Polar residues + GLY**

**Polar residues + GLY (n / %)**

11 / 61.11

**Nonpolar residues**

**Nonpolar residues (n / %)**

7 / 38.89

[Click to enlarge](#)

**Hydrophobic moment <math>\langle \mu\_H \rangle</math>**

0.240

**Net charge  $z$** 

-2

**Uncharged residues + GLY**

SER 1, THR 3, GLY 1

**Charged residues**

LYS 2, GLU 3, ASP 1,

**Hydrophobic face : none****Aromatic residues**

TYR 1,

**Special residues**

CYS 0, PRO 0

[Go to screening](#)[Manual mutation](#)[GA mutation](#)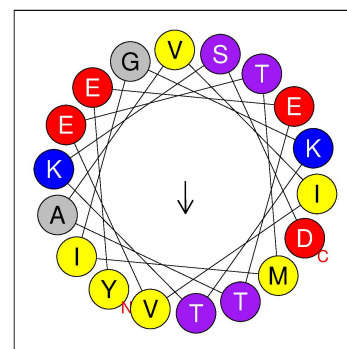

640EETAVIVETMIGKTKSDK657

**Physico-chemical properties****Hydrophobicity <math>\langle H \rangle</math>**

0.148

**Hydrophobic moment <math>\langle \mu\_H \rangle</math>**

0.164

**Net charge  $z$** 

-1

**Polar residues + GLY****Polar residues + GLY (n / %)**

12 / 66.67

**Uncharged residues + GLY**

SER 1, THR 3, GLY 1

**Charged residues**

LYS 3, GLU 3, ASP 1,

**Hydrophobic face : none****Nonpolar residues****Nonpolar residues (n / %)**

6 / 33.33

**Aromatic residues****Special residues**

CYS 0, PRO 0

[Go to screening](#)[Manual mutation](#)[GA mutation](#)[Click to enlarge](#)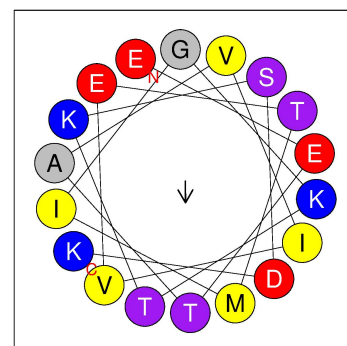

641ETAVIVETMIGKTKSDKK658

**Physico-chemical properties****Hydrophobicity <math>\langle H \rangle</math>**

0.128

**Hydrophobic moment <math>\langle \mu\_H \rangle</math>**

0.182

**Net charge  $z$** 

1

**Polar residues + GLY****Polar residues + GLY (n / %)**

12 / 66.67

**Uncharged residues + GLY**

SER 1, THR 3, GLY 1

**Charged residues**

LYS 4, GLU 2, ASP 1,

**Hydrophobic face : none****Nonpolar residues****Nonpolar residues (n / %)**

6 / 33.33

**Aromatic residues****Special residues**

CYS 0, PRO 0

[Go to screening](#)[Manual mutation](#)[GA mutation](#)[Click to enlarge](#)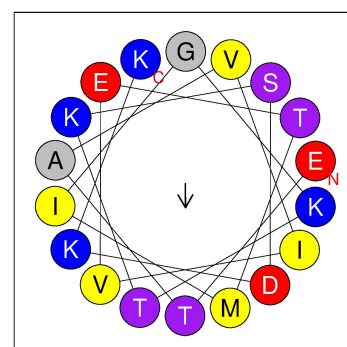

642TAVIVETMIGKTKSDKKK659

**Physico-chemical properties****Hydrophobicity <math>\langle H \rangle</math>**

0.109

**Hydrophobic moment <math>\langle \mu\_H \rangle</math>**

0.186

**Net charge  $z$** 

3

**Polar residues + GLY****Polar residues + GLY (n / %)**

12 / 66.67

**Uncharged residues + GLY**

SER 1, THR 3, GLY 1

**Charged residues**

LYS 5, GLU 1, ASP 1,

**Hydrophobic face : none****Nonpolar residues****Nonpolar residues (n / %)**

6 / 33.33

**Aromatic residues****Special residues**

CYS 0, PRO 0

[Go to screening](#)[Manual mutation](#)[GA mutation](#)[Click to enlarge](#)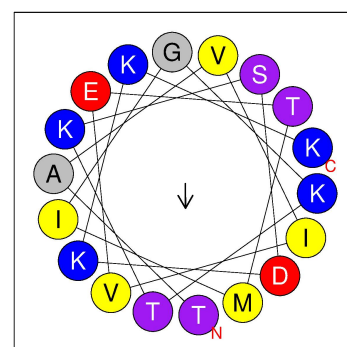

643AVIVETMIGKTKSDKKKK660

**Physico-chemical properties****Hydrophobicity <math>\langle H \rangle</math>**

0.092

**Polar residues + GLY****Polar residues + GLY (n / %)**

12 / 66.67

**Nonpolar residues****Nonpolar residues (n / %)**

6 / 33.33

[Click to enlarge](#)

**Hydrophobic moment  $\langle \mu_H \rangle$** 

0.170

**Net charge  $z$** 

3

**Uncharged residues + GLY**

SER 2, THR 2, GLY 1

**Charged residues**

LYS 5, GLU 1, ASP 1,

**Hydrophobic face : none****Aromatic residues****Special residues**

CYS 0, PRO 0

[Go to screening](#)[Manual mutation](#)[GA mutation](#)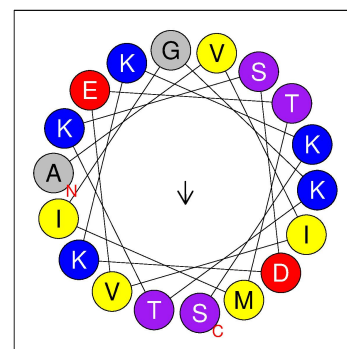

644VIVETMIGKTKSDKKKSG661

**Physico-chemical properties****Hydrophobicity  $\langle H \rangle$** 

0.075

**Hydrophobic moment  $\langle \mu_H \rangle$** 

0.172

**Net charge  $z$** 

3

**Polar residues + GLY****Polar residues + GLY (n / %)**

13 / 72.22

**Uncharged residues + GLY**

SER 2, THR 2, GLY 2

**Charged residues**

LYS 5, GLU 1, ASP 1,

**Hydrophobic face : none****Nonpolar residues****Nonpolar residues (n / %)**

5 / 27.78

**Aromatic residues****Special residues**

CYS 0, PRO 0

[Go to screening](#)[Manual mutation](#)[GA mutation](#)[Click to enlarge](#)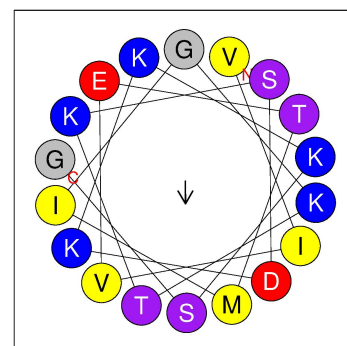

645IVETMIGKTKSDKKKSGE662

**Physico-chemical properties****Hydrophobicity  $\langle H \rangle$** 

-0.028

**Hydrophobic moment  $\langle \mu_H \rangle$** 

0.271

**Net charge  $z$** 

2

**Polar residues + GLY****Polar residues + GLY (n / %)**

14 / 77.78

**Uncharged residues + GLY**

SER 2, THR 2, GLY 2

**Charged residues**

LYS 5, GLU 2, ASP 1,

**Hydrophobic face : none****Nonpolar residues****Nonpolar residues (n / %)**

4 / 22.22

**Aromatic residues****Special residues**

CYS 0, PRO 0

[Go to screening](#)[Manual mutation](#)[GA mutation](#)[Click to enlarge](#)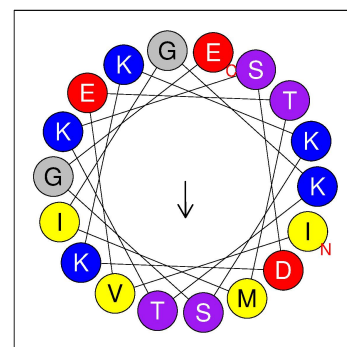

646VETMIGKTKSDKKKSGEK663

**Physico-chemical properties****Hydrophobicity  $\langle H \rangle$** 

-0.183

**Hydrophobic moment  $\langle \mu_H \rangle$** 

0.257

**Net charge  $z$** 

3

**Polar residues + GLY****Polar residues + GLY (n / %)**

15 / 83.33

**Uncharged residues + GLY**

SER 2, THR 2, GLY 2

**Charged residues**

LYS 6, GLU 2, ASP 1,

**Hydrophobic face : none****Nonpolar residues****Nonpolar residues (n / %)**

3 / 16.67

**Aromatic residues****Special residues**

CYS 0, PRO 0

[Go to screening](#)[Manual mutation](#)[GA mutation](#)[Click to enlarge](#)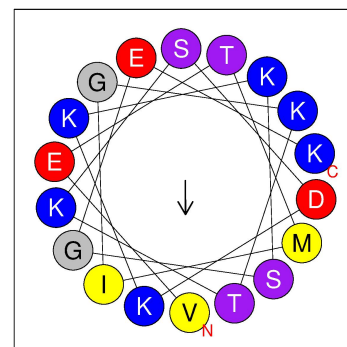

647ETMIGKTKSDKKKSGEKS664

**Physico-chemical properties****Hydrophobicity  $\langle H \rangle$** 

-0.253

**Polar residues + GLY****Polar residues + GLY (n / %)**

16 / 88.89

**Nonpolar residues****Nonpolar residues (n / %)**

2 / 11.11

[Click to enlarge](#)

Hydrophobic moment  $\langle \mu_H \rangle$

0.187

Net charge  $z$

3

Uncharged residues + GLY

SER 3, THR 2, GLY 2

Charged residues

LYS 6, GLU 2, ASP 1,

Hydrophobic face : none

Aromatic residues

Special residues

CYS 0, PRO 0

[Go to screening](#)

[Manual mutation](#)

[GA mutation](#)

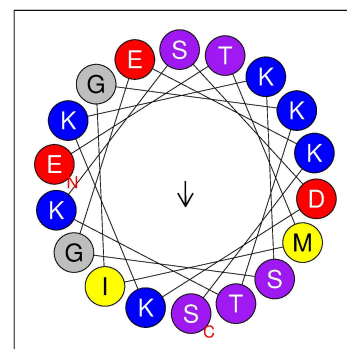

648 **TMIGKTKSDKKKSGEKSS** 665

Physico-chemical properties

Hydrophobicity  $\langle H \rangle$

-0.220

Hydrophobic moment  $\langle \mu_H \rangle$

0.185

Net charge  $z$

4

Polar residues + GLY

Polar residues + GLY (n / %)

16 / 88.89

Uncharged residues + GLY

SER 4, THR 2, GLY 2

Charged residues

LYS 6, GLU 1, ASP 1,

Hydrophobic face : none

Nonpolar residues

Nonpolar residues (n / %)

2 / 11.11

Aromatic residues

Special residues

CYS 0, PRO 0

[Go to screening](#)

[Manual mutation](#)

[GA mutation](#)

Click to enlarge

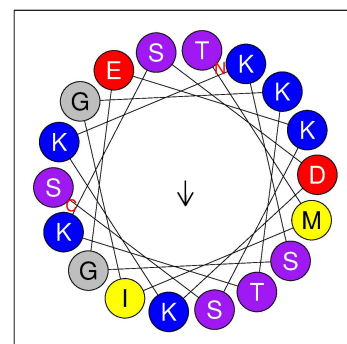

Hydrophobicity and Hydrophobic moment

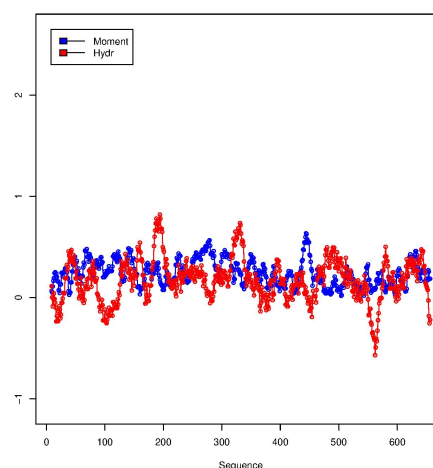

Data file (in txt format):

[Data.txt](#)

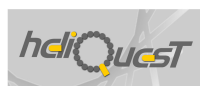



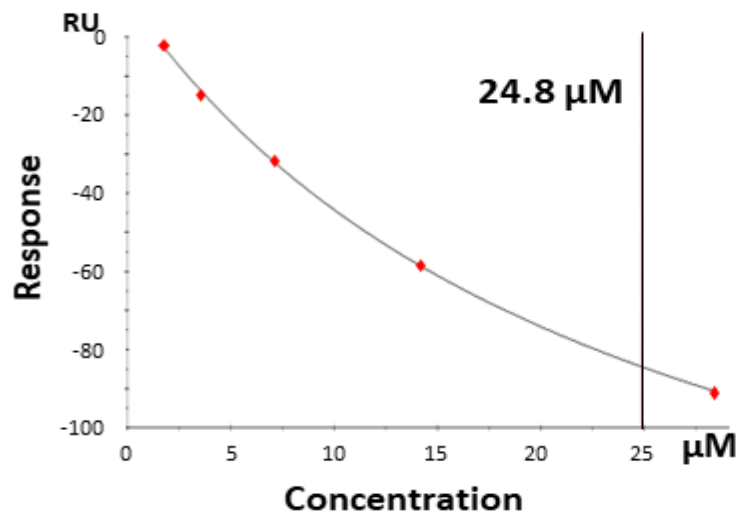

*Supplementary Figure S4: Affinity of recombinant human CRYAB for bovine lens lipids as measured by SPR.*

Recombinant human CRYAB was assessed for its affinity to the same L1 chip coated with lipids prepared from bovine lens membranes. An affinity of 22.83 $\mu\text{M}$  was measured.
